# Supplementary material for: Copper-catalyzed oxyamination of electron-deficient alkenes with N-acyloxyamines
Source: Royal Society of Chemistry journal article supplement (doi:10.1039/c6cc04638j), 2016-01-01
Supplement: c6cc04638j1.pdf [file c6cc04638j1.pdf]

# Copper-Catalyzed Oxyamination of Electron Deficient Alkenes with *N*-Acyloxyamines

Shichao Ren, Shengjin Song, Lu Ye, Chao Feng,\* and Teck-Peng Loh\*

*Department of Chemistry, University of Science and Technology of China*

*Institute of Advanced Synthesis, College of Chemistry and Molecular Engineering, Jiangsu National Synergetic Innovation Center for Advanced Materials, Nanjing Tech University, Nanjing, Jiangsu, P. R. China 210009*

*Division of Chemistry and Biological Chemistry, School of Physical and Mathematical Sciences, Nanyang Technological University*

[iamcfeng@njtech.edu.cn](mailto:iamcfeng@njtech.edu.cn)

[teckpeng@ntu.edu.sg](mailto:teckpeng@ntu.edu.sg)

## Supporting Information

| <b>Table of Contents</b>                                    | <b>Page No</b> |
|-------------------------------------------------------------|----------------|
| General information                                         | S-2            |
| Experimental section                                        | S-3            |
| Substrate synthesis                                         | S-3            |
| Reaction condition optimization                             | S-4            |
| Copper-catalyzed oxyamination of electron deficient alkenes | S-5            |
| Control experiments                                         | S-5            |
| Characterization of structurally novel products             | S-6            |
| <sup>1</sup> H and <sup>13</sup> C NMR spectra              | S-14           |
| X-ray Data                                                  | S-39           |

## General information

CuI, 2,2'-Dipyridine, Dioxane were purchased from commercial suppliers and used as received unless otherwise noted. All reactions were carried out under nitrogen atmosphere. Reactions were monitored through thin layer chromatography [Merck 60 F254 precoated silica gel plate (0.2 mm thickness)]. Subsequent to elution, spots were visualized using UV radiation (254 nm) on Spectroline Model ENF-24061/F 254 nm. Further visualization was possible using basic solution of potassium permanganate or acidic solution of ceric molybdate as stain, followed by heating on a hot plate. Flash chromatography was performed using Merck silica gel 60 with distilled solvents. HRMS spectra were recorded on a Waters Q-ToF Premier Spectrometer.  $^1\text{H}$  NMR and  $^{13}\text{C}$  NMR spectra were recorded using Bruker Avance 400 MHz spectrometers. Chemical shifts for  $^1\text{H}$  NMR spectra are reported as  $\delta$  in units of parts per million (ppm) downfield from  $\text{SiMe}_4$  ( $\delta$  0.0) and relative to the signal of  $\text{SiMe}_4$  ( $\delta$  0.00, singlet). Multiplicities were given as: s (singlet); brs (broad singlet); d (doublet); t (triplet); q (quartet); dd (doublets of doublet); ddd (doublets of doublets of doublet); td (triplet of doublet); m (multiplets); ddt (doublet of doublet of triplet) and etc. Coupling constants are reported as a  $J$  value in Hz. Carbon nuclear magnetic resonance spectra ( $^{13}\text{C}$  NMR) are reported as  $\delta$  in units of parts per million (ppm) downfield from  $\text{SiMe}_4$  ( $\delta$  0.0) and relative to the signal of chloroform-*d* ( $\delta$  77.00, triplet).

## Experimental section

### Substrate synthesis

All the vinyl ketone derivatives were known compounds. Substrates **2d-2g** were prepared according to the general procedure A.

#### General procedure A:

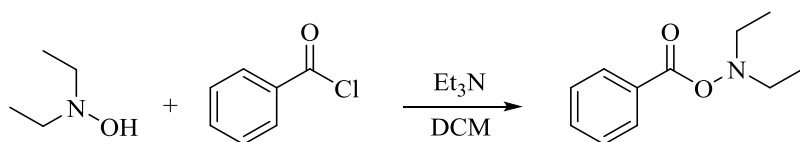

**General Procedure for the preparation of *N,N*-dialkyl *O*-hydroxylamine derivatives:** An oven-dried round bottom flask equipped with magnetic stir bar and addition funnel was charged with *N,N*-diethylhydroxylamine (0.89 g, 1.0 mL, 10 mmol), freshly distilled triethylamine (1.0 g, 1.4 mL, 10 mmol), and anhydrous dichloromethane (10 mL). The addition funnel was charged with benzoyl chloride (1.4 g, 1.2 mL, 10 mmol) and anhydrous dichloromethane (5 mL). The benzoyl chloride solution was added drop wise over 10 minutes and reaction mixture stirred at room temperature an additional 30 minutes. The reaction mixture was diluted with water (25 mL) and the organic layer was separated, washed with water (1 x 25mL), dried over sodium sulfate, and the solvent was removed under reduced pressure. The crude product was purified by flash chromatography, eluting with 15% ethyl acetate:hexanes, to afford *N,N*-diethyl-*O*-benzoylhydroxylamine (1.89 g, 9.8 mmol, 98 % yield) as a pale yellow oil.

## Reaction condition optimization.<sup>a</sup>

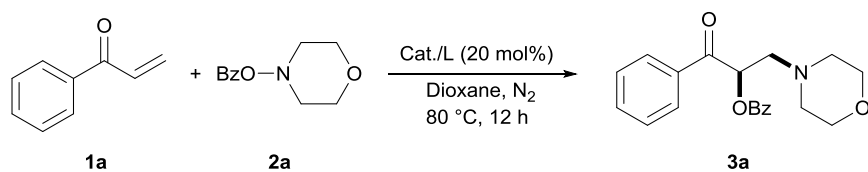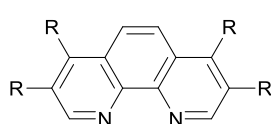

L1, R = H

L2, R = Me

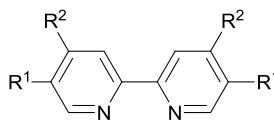

L3, R<sup>1</sup> = H, R<sup>2</sup> = *t*-Bu

L4, R<sup>1</sup> = Me, R<sup>2</sup> = H

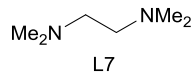

L7

| Entry    | Catalyst                              | Ligand    | Additive           | Yield <sup>b</sup> (%) |
|----------|---------------------------------------|-----------|--------------------|------------------------|
| 1        | CuI                                   | L1        | -                  | 50                     |
| 2        | CuI                                   | L3        | -                  | 58                     |
| 3        | CuI                                   | L7        | -                  | 0                      |
| 4        | CuI                                   | L4        | -                  | 70                     |
| 5        | CuI                                   | L5        | -                  | 42                     |
| <b>6</b> | <b>CuI</b>                            | <b>L6</b> | -                  | <b>76</b>              |
| 7        | CuI                                   | L2        | -                  | 40                     |
| 8        | CuCl                                  | L6        | -                  | 18                     |
| 9        | CuBr                                  | L6        | -                  | 30                     |
| 10       | Cu(MeCN) <sub>4</sub> PF <sub>6</sub> | L6        | -                  | 0                      |
| 11       | Cu(MeCN) <sub>4</sub> BF <sub>4</sub> | L6        | -                  | 0                      |
| 12       | CuOAc                                 | L6        | -                  | 0                      |
| 13       | CuBr SMe <sub>2</sub>                 | L6        | -                  | 52                     |
| 14       | CuI                                   | -         | -                  | 0 <sup>c</sup>         |
| 15       | -                                     | L6        | -                  | 0 <sup>a</sup>         |
| 16       | Cu(MeCN) <sub>4</sub> PF <sub>6</sub> | L6        | Bu <sub>4</sub> NI | 76 <sup>e</sup>        |

<sup>a</sup> Unless otherwise noted, the reactions were carried out at 80 °C using **1a** (0.1 mmol), **2a** (0.11 mmol), catalyst (0.02 mmol) and ligand (0.02 mmol) in solvent (1.0 mL) for 12 h. <sup>b</sup> Yield was determined by <sup>1</sup>H NMR using 1,1,2,2-tetrachloroethane as internal standard. <sup>c</sup> No ligand was added. <sup>d</sup> No catalyst was added. <sup>e</sup> 0.05 mmol Bu<sub>4</sub>NI was added.

## Copper-catalyzed oxyamination of electron deficient alkenes with *N*-acyloxyamines

### General procedure B:

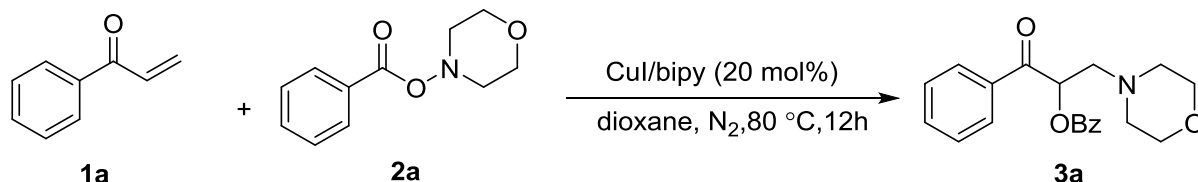

Under nitrogen atmosphere, oven-dried 10mL schlenk tube was charged with 1-phenylprop-2-en-1-one **1a** (13.2 mg, 0.1 mmol), morpholino benzoate **2a** (22.8 mg, 0.11 mmol), CuI (3.8 mg, 0.02 mmol), 2,2'-dipyridine (3.1 mg, 0.02mmol) in sequence followed by adding dioxane (1 mL) through syringe. After stirring at 80 °C for 12h, the reaction was diluted with ethyl acetate, and the resulting mixture was filtered and concentrated in vacuo, the residue was purified via silica gel chromatography to afforded the desired product **3a** (26.7 mg, Yield: 76%).

### Control experiments

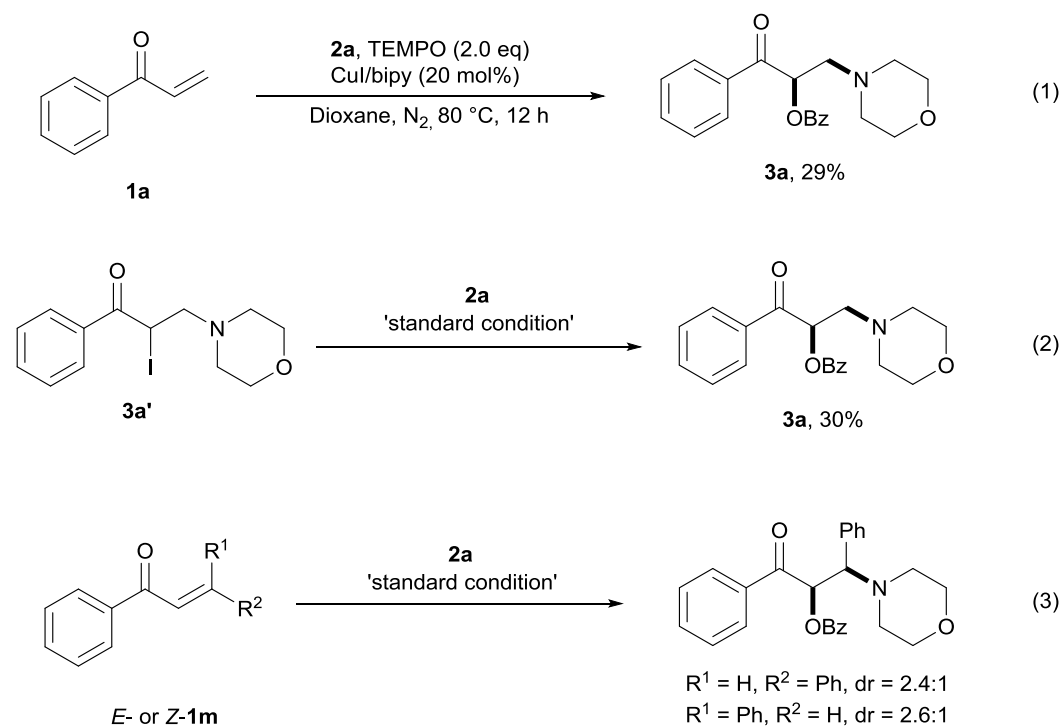

## Characterization of structurally novel compounds

### 3-morpholino-1-oxo-1-phenylpropan-2-yl benzoate:

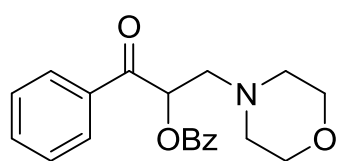

3a

$^1\text{H NMR}$  (400 MHz,  $\text{CDCl}_3$ ):  $\delta$  8.11 – 8.05 (m, 2H), 8.05 – 7.97 (m, 2H), 7.62 – 7.54 (m, 2H), 7.53 – 7.42 (m, 4H), 6.32 (dd,  $J = 6.7, 4.2$  Hz, 1H), 3.66 – 3.53 (m, 4H), 3.07 – 2.95 (m, 2H), 2.70 – 2.59 (m, 2H), 2.58 – 2.45 (m, 2H).ppm  $^{13}\text{C NMR}$  (100 MHz,  $\text{CDCl}_3$ ):  $\delta$  195.51 (s), 165.85 (s), 135.33 (s), 133.43 (s), 133.36 (s), 129.84 (s), 129.37 (s), 128.73 (s), 128.45 (s), 128.36 (s), 74.14 (s), 66.86 (s), 58.95 (s), 53.79 (s).ppm; **HRMS (ESI, m/z)**: calcd for  $\text{C}_{20}\text{H}_{22}\text{NO}_4$   $[\text{M}+\text{H}]^+$  340.1549, found: 340.1551.

### 3-morpholino-1-oxo-1-(p-tolyl)propan-2-yl benzoate:

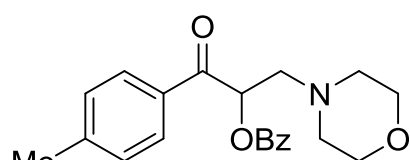

3b

$^1\text{H NMR}$  (400 MHz,  $\text{CDCl}_3$ ):  $\delta$  8.11 – 8.05 (m, 2H), 7.92 (d,  $J = 8.2$  Hz, 2H), 7.61 – 7.55 (m, 1H), 7.48 – 7.40 (m, 2H), 7.28 (d,  $J = 8.0$  Hz, 2H), 6.32 (dd,  $J = 6.9, 4.0$  Hz, 1H), 3.67 – 3.57 (m, 4H), 3.07 – 2.95 (m, 2H), 2.66 (m, 2H), 2.60 – 2.51 (m, 2H), 2.42 (s, 3H).ppm;  $^{13}\text{C NMR}$  (100 MHz,  $\text{CDCl}_3$ ):  $\delta$  194.87 (s), 165.84 (s), 144.46 (s), 133.32 (s), 132.55 (s), 129.84 (s), 129.45 (s), 128.53 (s), 128.42 (s), 128.23(s), 73.93 (s), 66.82 (s), 58.97 (s), 53.75 (s), 21.71 (s). ppm; **HRMS (ESI, m/z)**: calcd for  $\text{C}_{20}\text{H}_{24}\text{NO}_4$   $[\text{M}+\text{H}]^+$  354.1705, found: 354.1708.

### 1-(4-methoxyphenyl)-3-morpholino-1-oxopropan-2-yl benzoate:

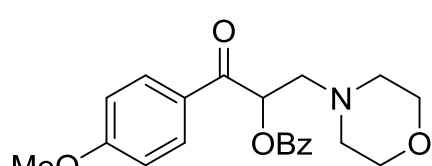

3c

$^1\text{H NMR}$  (400 MHz,  $\text{CDCl}_3$ ):  $\delta$  8.08 (d,  $J = 7.3$  Hz, 2H), 8.02 (d,  $J = 8.9$  Hz, 2H), 7.58 (t,  $J = 7.4$  Hz, 1H), 7.45 (t,  $J = 7.7$  Hz, 2H), 6.97 (d,  $J = 8.9$  Hz, 2H), 6.29 (dd,  $J = 6.6, 4.4$  Hz, 1H), 3.88 (s, 3H), 3.62 (t,  $J = 4.6$  Hz, 4H), 3.08 – 2.93 (m, 2H), 2.60 (m, 4H). ppm;  $^{13}\text{C NMR}$  (100 MHz,  $\text{CDCl}_3$ ):  $\delta$  193.70 (s), 165.88 (s), 163.86 (s), 133.31 (s), 130.81 (s), 129.85 (s), 129.49 (s), 128.43 (s), 127.99 (s), 113.98 (s), 73.71 (s), 66.92 (s), 59.18 (s), 55.50 (s), 53.83 (s). ppm; **HRMS (ESI, m/z)**: calcd for  $\text{C}_{21}\text{H}_{24}\text{NO}_5$   $[\text{M}+\text{H}]^+$  370.1654, found: 370.1655.

### 1-(4-chlorophenyl)-3-morpholino-1-oxopropan-2-yl benzoate:

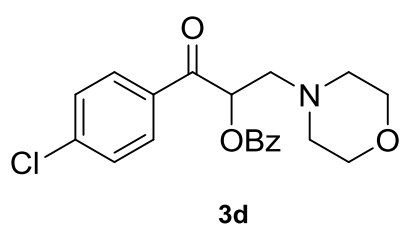

**<sup>1</sup>H NMR (400 MHz, CDCl<sub>3</sub>):** δ 8.10 – 8.03 (m, 2H), 7.99 – 7.92 (m, 2H), 7.60 (t, J = 7.5 Hz, 1H), 7.50 – 7.43 (m, 4H), 6.23 (dd, J = 6.5, 4.4 Hz, 1H), 3.64 – 3.53 (m, 4H), 3.07 – 2.93 (m, 2H), 2.62 (dt, J = 9.2, 4.5 Hz, 2H), 2.57 – 2.47 (m, 2H). ppm; **<sup>13</sup>C NMR (100 MHz, CDCl<sub>3</sub>):** δ 194.58 (s), 165.86 (s), 139.92 (s), 133.74 (s), 133.50 (s), 129.85 (s), 129.79 (s), 129.20 (s), 129.10 (s), 128.51 (s), 74.00 (s), 66.86 (s), 58.95 (s), 53.85 (s). ppm; **HRMS (ESI, m/z):** calcd for C<sub>20</sub>H<sub>21</sub>ClNO<sub>4</sub> [M+H]<sup>+</sup> 374.1159, found: 374.1158.

### 1-(4-fluorophenyl)-3-morpholino-1-oxopropan-2-yl benzoate:

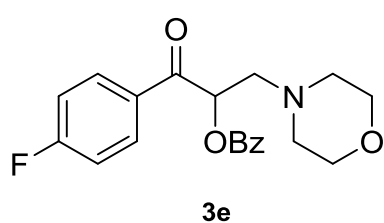

**<sup>1</sup>H NMR (400 MHz, CDCl<sub>3</sub>):** δ 8.10 – 8.02 (m, 4H), 7.63 – 7.56 (m, 1H), 7.49 – 7.42 (m, 2H), 7.22 – 7.12 (m, 2H), 6.24 (dd, J = 6.6, 4.4 Hz, 1H), 3.64 – 3.54 (m, 4H), 3.07 – 2.94 (m, 2H), 2.63 (dt, J = 9.3, 4.6 Hz, 2H), 2.58 – 2.46 (m, 2H). ppm; **<sup>13</sup>C NMR (100 MHz, CDCl<sub>3</sub>):** δ 194.08 (s), 165.88 (d, J=255.5Hz), 165.86 (s), 133.46 (s), 131.73 (d, J = 3.0 Hz), 131.08 (d, J = 9.3 Hz), 129.84 (s), 129.24 (s), 128.49 (s), 115.95 (d, J = 22.0 Hz), 73.92 (s), 66.86 (s), 58.98 (s), 53.84 (s). ppm; **HRMS (ESI, m/z):** calcd for C<sub>20</sub>H<sub>21</sub>FNO<sub>4</sub> [M+H]<sup>+</sup> 358.1454, found: 358.1450.

### 1-(4-cyanophenyl)-3-morpholino-1-oxopropan-2-yl benzoate:

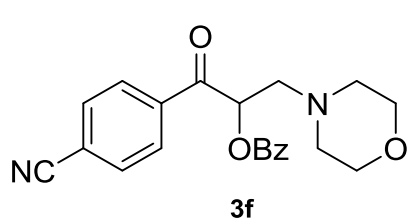

**<sup>1</sup>H NMR (400 MHz, CDCl<sub>3</sub>):** δ 8.13 – 8.07 (m, 2H), 8.05 (dt, J = 8.5, 1.6 Hz, 2H), 7.82 – 7.76 (m, 2H), 7.64 – 7.58 (m, 1H), 7.50 – 7.43 (m, 2H), 6.19 (dd, J = 6.3, 4.7 Hz, 1H), 3.62 – 3.48 (m, 4H), 3.02 (qd, J = 13.8, 5.5 Hz, 2H), 2.67 – 2.55 (m, 2H), 2.55 – 2.42 (m, 2H). ppm; **<sup>13</sup>C NMR (100 MHz, CDCl<sub>3</sub>):** δ 195.11 (s), 165.86 (s), 138.98 (s), 133.68 (s), 132.53 (s), 129.84 (s), 128.89 (s), 128.69 (s), 128.58 (s), 117.78 (s), 116.50 (s), 74.09 (s), 66.76 (s), 58.78 (s), 53.85 (s). ppm; **HRMS (ESI, m/z):** calcd for C<sub>21</sub>H<sub>21</sub>N<sub>2</sub>O<sub>4</sub> [M+H]<sup>+</sup> 365.1501, found: 365.1505.

### 1-(2-chlorophenyl)-3-morpholino-1-oxopropan-2-yl benzoate:

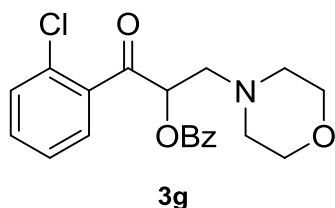

**<sup>1</sup>H NMR (400 MHz, CDCl<sub>3</sub>):** δ 8.08 – 8.01 (m, 2H), 7.74 (dd, J = 7.5, 1.5 Hz, 1H), 7.59 (t, J = 7.4 Hz, 1H), 7.49 – 7.32 (m, 5H), 6.24 (dd, J = 6.1, 4.6 Hz, 1H), 3.63 – 3.48 (m, 4H), 2.98 (q, J = 13.8, 5.4 Hz, 2H), 2.66 – 2.55 (m, 2H), 2.45 – 2.33 (m, 2H). ppm; **<sup>13</sup>C NMR (100 MHz, CDCl<sub>3</sub>):** δ 197.90 (s), 165.77 (s), 137.94 – 137.02 (m), 133.42 (s), 131.91 (s), 131.43 (s), 130.49 (s), 129.80 (s), 129.41 (s), 129.31 (s), 128.48 (s), 126.68 (s), 76.44 (s), 66.78 (s), 58.45 (s), 53.87 (s). ppm; **HRMS (ESI, m/z):** calcd for C<sub>20</sub>H<sub>21</sub>ClNO<sub>4</sub> [M+H]<sup>+</sup> 374.1159, found: 374.1161.

### 1-(3-bromophenyl)-3-morpholino-1-oxopropan-2-yl benzoate:

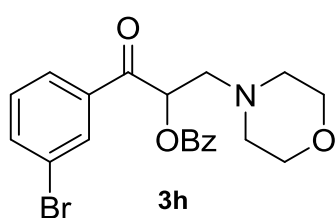

**<sup>1</sup>H NMR (400 MHz, CDCl<sub>3</sub>):** δ 8.17 (t, J = 1.7 Hz, 1H), 8.10 – 8.03 (m, 2H), 7.93 (d, J = 7.8 Hz, 1H), 7.72 (d, J = 8.4 Hz, 1H), 7.60 (t, J = 7.5 Hz, 1H), 7.47 (t, J = 7.8 Hz, 2H), 7.38 (t, J = 7.9 Hz, 1H), 6.18 (dd, J = 6.3, 4.5 Hz, 1H), 3.66 – 3.50 (m, 4H), 3.01 (q, J = 13.8, 5.5 Hz, 2H), 2.66 – 2.58 (m, 2H), 2.58 – 2.48 (m, 2H). ppm; **<sup>13</sup>C NMR (100 MHz, CDCl<sub>3</sub>):** δ 194.71 (s), 165.84 (s), 137.31 (s), 136.19 (s), 133.52 (s), 131.52 (s), 130.28 (s), 129.86 (s), 129.17 (s), 128.52 (s), 126.81 (s), 123.00 (s), 74.23 (s), 66.85 (s), 58.95 (s), 53.87 (s). ppm; **HRMS (ESI, m/z):** calcd for C<sub>20</sub>H<sub>21</sub>BrNO<sub>4</sub> [M+H]<sup>+</sup> 418.0654, found: 418.0651.

### 3-morpholino-1-(naphthalen-2-yl)-1-oxopropan-2-yl benzoate:

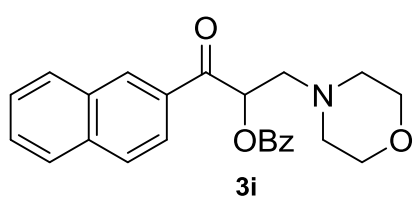

**<sup>1</sup>H NMR (400 MHz, CDCl<sub>3</sub>):** δ 8.59 (s, 1H), 8.14 – 8.08 (m, 2H), 8.05 (dd, J = 8.6, 1.7 Hz, 1H), 7.99 (d, J = 8.0 Hz, 1H), 7.91 (dd, J = 15.7, 8.4 Hz, 2H), 7.65-7.53 (m, 3H), 7.50-7.42 (t, J = 7.8, 2H), 6.48 (dd, J = 6.6, 4.1 Hz, 1H), 3.66 – 3.54 (m, 4H), 3.08 (q, J = 14.0, 5.4 Hz, 2H), 2.74-2.61 (m, 2H), 2.62 – 2.48 (m, 2H). ppm; **<sup>13</sup>C NMR (100 MHz, CDCl<sub>3</sub>):** δ 195.42 (s), 165.91 (s), 135.69 (s), 133.39 (s), 132.60 (m), 132.41 (s), 130.08 (s), 129.87 (s), 129.63 (s), 129.37 (s), 128.72 (s), 128.69 (s), 128.47 (s), 127.81 (s), 126.92 (s), 124.05 (s), 74.25 (s), 66.87 (s), 59.13 (s), 53.82 (s). ppm; **HRMS (ESI, m/z):** calcd for C<sub>24</sub>H<sub>24</sub>NO<sub>4</sub> [M+H]<sup>+</sup> 390.1705, found: 390.1700.



### 1-morpholino-3-oxopentan-2-yl benzoate:

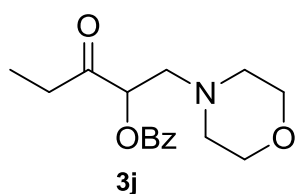

**<sup>1</sup>H NMR (400 MHz, CDCl<sub>3</sub>):** δ 8.08 – 8.01 (m, 2H), 7.62 – 7.55 (m, 1H), 7.49 – 7.42 (m, 2H), 5.47 (dd, J = 6.7, 3.8 Hz, 1H), 3.71 – 3.59 (m, 4H), 2.99 (dd, J = 13.8, 6.8 Hz, 1H), 2.88 (dd, J = 13.8, 3.8 Hz, 1H), 2.70 – 2.48 (m, 6H), 1.10 (t, J = 7.2 Hz, 3H). ppm; **<sup>13</sup>C NMR (100 MHz, CDCl<sub>3</sub>):** δ 206.94 (s), 165.81 (s), 133.42 (s), 129.74 (s), 129.32 (s), 128.50 (s), 77.14 (s), 66.85 (s), 58.73 (s), 53.93 (s), 32.83 (s), 7.16 (s). ppm; **HRMS (ESI, m/z):** calcd for C<sub>16</sub>H<sub>22</sub>NO<sub>4</sub> [M+H]<sup>+</sup> 292.1549, found: 292.1547.

### 1-morpholino-3-oxoundecan-2-yl benzoate:

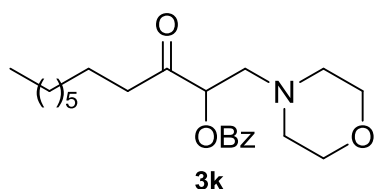

**<sup>1</sup>H NMR (400 MHz, CDCl<sub>3</sub>):** δ 8.08 – 8.03 (m, 2H), 7.62 – 7.56 (m, 1H), 7.49 – 7.43 (m, 2H), 5.46 (dd, J = 6.7, 3.7 Hz, 1H), 3.71 – 3.60 (m, 4H), 2.99 (dd, J = 13.8, 6.7 Hz, 1H), 2.87 (dd, J = 13.8, 3.7 Hz, 1H), 2.72 – 2.62 (m, 2H), 2.62 – 2.47 (m, 4H), 1.61 (dd, J = 14.4, 7.2 Hz, 2H), 1.35 – 1.14 (m, 10H), 0.87 (t, J = 6.9 Hz, 3H). ppm; **<sup>13</sup>C NMR (100 MHz, CDCl<sub>3</sub>):** δ 206.39 (s), 165.80 (s), 133.42 (s), 129.76 (s), 129.34 (s), 128.51 (s), 77.22 (s), 66.86 (s), 58.66 (s), 53.94 (s), 39.53 (s), 31.79 (s), 29.36 (s), 29.17 (s), 29.10 (s), 23.04 (s), 22.61 (s), 14.07 (s). ppm; **HRMS (ESI, m/z):** calcd for C<sub>22</sub>H<sub>34</sub>NO<sub>4</sub> [M+H]<sup>+</sup> 376.2488, found: 376.2493.

### 3-morpholino-1-oxo-1-phenylbutan-2-yl benzoate:

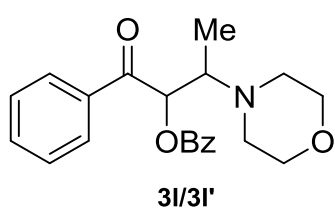

(major diastereoisomer **3l**) **<sup>1</sup>H NMR (400 MHz, CDCl<sub>3</sub>):** δ 8.12 – 7.98 (m, 4H), 7.63 – 7.54 (m, 2H), 7.53 – 7.41 (m, 4H), 6.14 (d, J = 6.8 Hz, 1H), 3.50 – 3.41 (m, 2H), 3.35 (p, J = 6.8 Hz, 1H), 3.28 (d, J = 4.6 Hz, 2H), 2.66 – 2.48 (m, 4H), 1.24 (d, J = 6.8 Hz, 3H). ppm; **<sup>13</sup>C NMR (100 MHz, CDCl<sub>3</sub>):** δ 197.81 (s), 165.98 (s), 136.92 (s), 133.41 (s), 133.00 (s), 129.83 (s), 129.33 (s), 128.67 (s), 128.47 (s), 128.21 (s), 75.37 (s), 66.80 (s), 61.41 (s), 49.43 (s), 9.98 (s). ppm (minor diastereoisomer **3l'**) **<sup>1</sup>H NMR (400 MHz, CDCl<sub>3</sub>):** δ 8.11 – 8.07 (m, 2H), 7.99 – 7.92 (m, 2H), 7.62 – 7.53 (m, 2H), 7.50 – 7.44 (m, 4H), 6.26 (d, J = 6.0 Hz, 1H), 3.57 – 3.48 (m, 4H), 3.48 – 3.39 (m, 1H), 2.80 – 2.69 (m, 2H), 2.36 – 2.22 (m, 2H), 1.15 (d, J = 6.9 Hz, 3H). ppm; **<sup>13</sup>C NMR (100 MHz, CDCl<sub>3</sub>):** δ 195.24 (s), 165.91 (s), 136.55 (s), 133.30 (s), 132.79 (s), 129.77 (s), 129.63 (s), 128.57 (s), 128.50 (s),

128.01 (s), 78.97 (s), 67.19 (s), 60.25 (s), 49.30 (s), 9.03 (s).ppm; **HRMS (ESI, m/z)**: calcd for C<sub>21</sub>H<sub>24</sub>NO<sub>4</sub> [M+H]<sup>+</sup> 354.1705, found: 354.1704.

### 1-morpholino-3-oxo-1,3-diphenylpropan-2-yl benzoate:

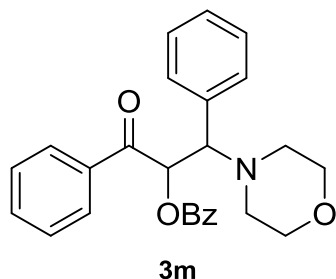

(major diastereoisomer) **<sup>1</sup>H NMR (400 MHz, CDCl<sub>3</sub>)**: δ 8.14 – 8.04 (m, 1H), 7.86 (t, J = 10.6 Hz, 1H), 7.59 (t, J = 7.3 Hz, 1H), 7.51 (t, J = 8.0 Hz, 1H), 7.38 – 7.24 (m, 4H), 6.67 (d, J = 9.2 Hz, 1H), 4.31 (d, J = 9.2 Hz, 1H), 3.39 – 3.27 (m, 1H), 3.13 (s, 1H), 2.54 – 2.41 (m, 1H), 2.30 (s, 1H). ppm; **<sup>13</sup>C NMR (100 MHz, CDCl<sub>3</sub>)**: δ 198.27 (s), 166.12 (s), 137.85 (s), 133.59 (s), 133.33 (s), 132.91 (s), 129.82 (s), 129.05 (s), 128.91 (s), 128.66 (s), 128.34 (s), 128.30 (s), 128.26 (s), 128.11 (s), 71.73 (s), 71.39 (s), 66.54 (s), 50.53 (s). ppm; **HRMS (ESI, m/z)**: calcd for C<sub>26</sub>H<sub>26</sub>NO<sub>4</sub> [M+H]<sup>+</sup> 416.1862, found: 416.1868.

### 2-methyl-3-morpholino-1-oxo-1-phenylpropan-2-yl benzoate:

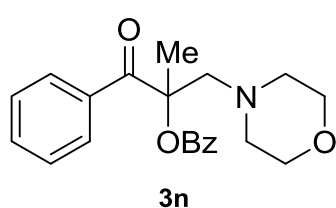

**<sup>1</sup>H NMR (400 MHz, CDCl<sub>3</sub>)**: δ 8.08 – 8.02 (m, 2H), 7.95 – 7.88 (m, 2H), 7.59 – 7.53 (m, 1H), 7.46 – 7.38 (m, 3H), 7.36 – 7.28 (m, 2H), 3.67 – 3.56 (m, 4H), 3.23 (d, J = 14.4 Hz, 1H), 3.08 (d, J = 14.4 Hz, 1H), 2.67 – 2.54 (m, 4H), 1.89 (s, 3H). ppm. **<sup>13</sup>C NMR (100 MHz, CDCl<sub>3</sub>)**: δ 199.48 (s), 165.41 (s), 135.65 (s), 133.24 (s), 132.23 (s), 130.09 (s), 129.53 (s), 128.55 (s), 128.48 (s), 128.20 (s), 88.08 (s), 67.05 (s), 64.20 (s), 55.14 (s), 22.09 (s) ppm. **HRMS (ESI, m/z)**: calcd for C<sub>21</sub>H<sub>24</sub>NO<sub>4</sub> [M+H]<sup>+</sup> 354.1705, found: 354.1709.

### 3-morpholino-1-oxo-1-(thiophen-2-yl)propan-2-yl benzoate:

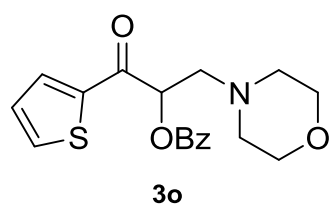

**<sup>1</sup>H NMR (400 MHz, CDCl<sub>3</sub>)**: δ 8.12 – 8.03 (m, 1H), 7.92 (d, J = 3.7 Hz, 1H), 7.70 (d, J = 4.9 Hz, 1H), 7.60 (t, J = 7.4 Hz, 1H), 7.47 (t, J = 7.7 Hz, 1H), 7.20 – 7.13 (m, 1H), 6.09 (dd, J = 6.9, 4.6 Hz, 1H), 3.70 – 3.56 (m, 2H), 3.13 – 2.98 (m, 1H), 2.66 (dt, J = 9.3, 4.6 Hz, 1H), 2.62 – 2.54 (m, 1H). ppm; **<sup>13</sup>C NMR (100 MHz, CDCl<sub>3</sub>)**: δ 188.14 (s), 165.78 (s), 141.31 (s), 134.49 (s), 133.46 (s), 132.77 (s), 129.90 (s), 129.28 (s), 128.50 (s), 128.25 (s), 74.60 (s), 66.92 (s), 59.42 (s), 53.83 (s). ppm. **HRMS (ESI, m/z)**: calcd for C<sub>18</sub>H<sub>20</sub>NO<sub>4</sub>S [M+H]<sup>+</sup> 346.1113, found: 346.1118.

### 1-(1-methyl-1H-imidazol-2-yl)-3-morpholino-1-oxobutan-2-yl benzoate:

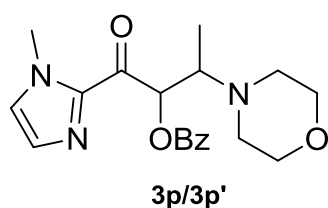

(major diastereoisomer **3p**)  $^1\text{H NMR}$  (400 MHz,  $\text{CDCl}_3$ ):  $\delta$  8.10 – 8.03 (m, 2H), 7.57 (t,  $J = 7.4$  Hz, 1H), 7.44 (t,  $J = 7.7$  Hz, 2H), 7.18 (s, 1H), 7.05 (s, 1H), 6.49 (d,  $J = 7.0$  Hz, 1H), 3.99 (s, 3H), 3.54 – 3.42 (m, 3H), 3.28 (s, 2H), 2.82 – 2.72 (m, 2H), 2.64 – 2.53 (m, 2H), 1.26 (d,  $J = 6.8$  Hz, 3H). ppm;  $^{13}\text{C NMR}$  (100 MHz,  $\text{CDCl}_3$ ):  $\delta$  188.82 (s), 165.66 (s), 142.25 (s), 133.24 (s), 129.81 (s), 129.49 (s), 128.40 (s), 126.66 (s), 75.52 (s), 67.29 (s), 61.70 (s), 49.40 (s), 35.80 (s), 10.55 (s). (minor diastereoisomer **3p'**)  $^1\text{H NMR}$  (400 MHz,  $\text{CDCl}_3$ ):  $\delta$  8.12 – 8.07 (m, 2H), 7.59 (t,  $J = 7.4$  Hz, 1H), 7.47 (t,  $J = 7.7$  Hz, 2H), 7.16 (s, 1H), 7.05 (s, 1H), 6.39 (d,  $J = 5.5$  Hz, 1H), 4.10 – 4.02 (m, 1H), 4.03 – 3.96 (m, 3H), 3.58 – 3.39 (d,  $J = 3.9$  Hz, 4H), 2.86 – 2.74 (m, 2H), 2.41 – 2.27 (m, 2H), 1.21 (d,  $J = 7.0$  Hz, 3H). ppm;  $^{13}\text{C NMR}$  (100 MHz,  $\text{CDCl}_3$ ):  $\delta$  185.77 (s), 165.71 (s), 141.58 (s), 133.20 (s), 129.72 (s), 128.98 (s), 128.49 (s), 126.31 (s), 80.62 (s), 67.50 (s), 60.48 (s), 49.15 (s), 35.81 (s), 8.21 (s). ppm; HRMS (ESI,  $m/z$ ): calcd for  $\text{C}_{19}\text{H}_{24}\text{N}_3\text{O}_4$   $[\text{M}+\text{H}]^+$  358.1767, found: 358.1772.

### 1-(1-methyl-1H-imidazol-2-yl)-3-morpholino-1-oxo-3-phenylpropan-2-yl benzoate:

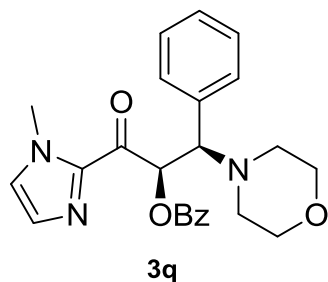

$^1\text{H NMR}$  (400 MHz,  $\text{CDCl}_3$ ):  $\delta$  7.85 (d,  $J = 7.2$  Hz, 2H), 7.49 (t,  $J = 7.5$  Hz, 1H), 7.38 – 7.29 (m, 7H), 7.25 (s, 1H), 7.08 (d,  $J = 8.0$  Hz, 2H), 4.40 (d,  $J = 9.2$  Hz, 1H), 3.97 (s, 3H), 3.43 – 3.33 (m, 2H), 3.27–3.09 (m, 2H), 2.76 – 2.67 (m, 2H), 2.37 – 2.22 (m, 2H). ppm;  $^{13}\text{C NMR}$  (100 MHz,  $\text{CDCl}_3$ ):  $\delta$  188.51 (s), 165.76 (s), 142.75 (s), 134.03 (s), 133.12 (s), 129.82 (s), 129.58 (s), 129.27 (s), 128.99 (s), 128.27 (s), 128.15 (s), 127.96 (s), 126.70 (s), 72.51 (s), 71.45 (s), 67.11 (s), 50.36 (s), 35.73 (s). ppm; HRMS (ESI,  $m/z$ ): calcd for  $\text{C}_{24}\text{H}_{26}\text{N}_3\text{O}_4$   $[\text{M}+\text{H}]^+$  420.1923, found: 420.1918.

### 1-oxo-1-phenyl-3-(piperidin-1-yl)propan-2-yl benzoate:

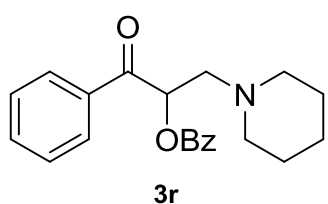

$^1\text{H NMR}$  (400 MHz,  $\text{CDCl}_3$ ):  $\delta$  8.15 – 8.06 (m, 2H), 8.06 – 7.96 (m, 2H), 7.58 (ddd,  $J = 7.4, 2.3, 1.1$  Hz, 2H), 7.47 (dt,  $J = 13.3, 7.6$  Hz, 4H), 6.29 (dd,  $J = 6.6, 4.4$  Hz, 1H), 3.07 – 2.91 (m, 2H), 2.64 – 2.42 (m, 4H), 1.55 –

1.42 (m, 4H), 1.41 – 1.29 (m, 2H). ppm;  $^{13}\text{C}$  NMR (100 MHz,  $\text{CDCl}_3$ ):  $\delta$  196.10 (s), 165.99 (s), 135.37 (s), 133.32 (s), 133.25 (s), 129.89 (s), 129.55 (s), 128.66 (s), 128.47 (s), 128.40 (s), 74.45 (s), 59.37 (s), 54.73 (s), 25.96 (s), 23.96 (s). ppm; HRMS (ESI, m/z): calcd for  $\text{C}_{21}\text{H}_{24}\text{NO}_3$   $[\text{M}+\text{H}]^+$  338.1756, found: 338.1757.

### 3-(dibenzylamino)-1-oxo-1-phenylpropan-2-yl benzoate:

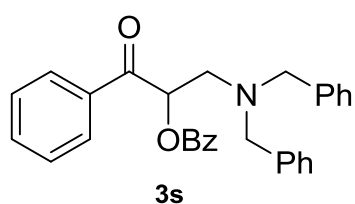

$^1\text{H}$  NMR (400 MHz,  $\text{CDCl}_3$ ):  $\delta$  8.08 (dd,  $J = 5.2, 3.3$  Hz, 2H), 7.71 (dd,  $J = 8.3, 1.2$  Hz, 2H), 7.61 – 7.55 (m, 1H), 7.55 – 7.49 (m, 1H), 7.44 (dd,  $J = 10.6, 4.7$  Hz, 2H), 7.34 (t,  $J = 7.8$  Hz, 2H), 7.3 – 7.17 (m, 10H), 6.29 (dd,  $J = 8.1, 3.3$  Hz, 1H), 3.81 (d,  $J = 13.5$  Hz, 2H), 3.72 – 3.63 (m, 2H), 3.25 – 3.05 (m, 2H). ppm;  $^{13}\text{C}$  NMR (100 MHz,  $\text{CDCl}_3$ ):  $\delta$  195.17 (s), 166.01 (s), 138.85 (s), 134.72 (s), 133.39 (s), 133.30 (s), 129.94 (s), 129.45 (s), 128.88 (s), 128.67 (s), 128.42 (s), 128.36 (s), 128.31 (s), 127.10 (s), 75.34 (s), 59.08 (s), 54.10 (s). ppm; HRMS (ESI, m/z): calcd for  $\text{C}_{30}\text{H}_{28}\text{NO}_3$   $[\text{M}+\text{H}]^+$  450.2069, found: 450.2073.

### 3-(diethylamino)-1-oxo-1-phenylpropan-2-yl benzoate:

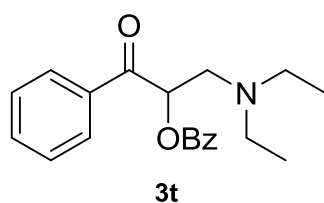

$^1\text{H}$  NMR (400 MHz,  $\text{CDCl}_3$ ):  $\delta$  8.11 – 8.06 (m, 2H), 8.06 – 8.00 (m, 2H), 7.61 – 7.54 (m, 2H), 7.51 – 7.42 (m, 4H), 6.24 (dd,  $J = 6.7, 4.7$  Hz, 1H), 3.15 – 3.02 (m, 2H), 2.68 – 2.57 (m, 4H), 0.98 (t,  $J = 7.1$  Hz, 6H). ppm;  $^{13}\text{C}$  NMR (100 MHz,  $\text{CDCl}_3$ ):  $\delta$  196.35 (s), 166.06 (s), 135.56 (s), 133.34 (s), 133.22 (s), 129.87 (s), 129.58 (s), 128.66 (s), 128.52 (s), 128.39 (s), 74.99 (s), 53.71 (s), 47.62 (s), 11.89 (s). ppm; HRMS (ESI, m/z): calcd for  $\text{C}_{20}\text{H}_{24}\text{NO}_3$   $[\text{M}+\text{H}]^+$  326.17656, found: 326.1763.

### 3-(diethylamino)-1-oxo-1-phenylpropan-2-yl 4-nitrobenzoate:

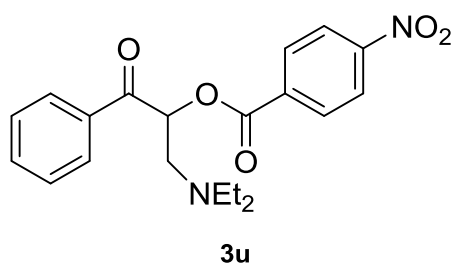

$^1\text{H}$  NMR (400 MHz,  $\text{CDCl}_3$ ):  $\delta$  8.35 – 8.21 (m, 4H), 8.06 – 7.97 (m, 2H), 7.62 (t,  $J = 7.4$  Hz, 1H), 7.51 (t,  $J = 7.6$  Hz, 2H), 6.29 (dd,  $J = 7.0, 4.4$  Hz, 1H), 3.16 – 3.00 (m, 2H), 2.70 – 2.53 (m, 4H), 0.97 (t,  $J = 7.1$  Hz, 6H). ppm;  $^{13}\text{C}$  NMR (100 MHz,  $\text{CDCl}_3$ ):  $\delta$  195.57 (s), 164.23

(s), 150.69 (s), 135.21 (s), 135.03 (s), 133.65 (s), 130.96 (s), 128.78 (s), 128.46 (s), 123.57 (s), 75.95 (s), 53.77 (s), 47.62 (s), 11.86 (s). ppm; **HRMS (ESI, m/z):** calcd for C<sub>20</sub>H<sub>23</sub>N<sub>2</sub>O<sub>5</sub> [M+H]<sup>+</sup> 371.1607, found: 371.1605.

### 3-oxo-3-phenylprop-1-en-2-yl thiophene-2-carboxylate:

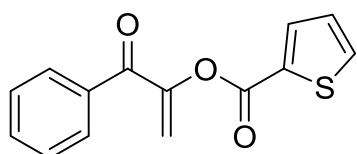

3v

**<sup>1</sup>H NMR (400 MHz, CDCl<sub>3</sub>):** δ 7.96 – 7.87 (m, 3H), 7.66 (dd, J = 4.7, 0.9 Hz, 1H), 7.58 (t, J = 7.4 Hz, 1H), 7.47 (t, J = 7.7 Hz, 2H), 7.17 – 7.12 (m, 1H), 5.86 (d, J = 2.2 Hz, 1H), 5.70 (d, J = 2.2 Hz, 1H). ppm; **<sup>13</sup>C NMR (100 MHz, CDCl<sub>3</sub>):** δ 189.42 (s), 160.01 (s), 150.93 (s), 136.12 (s), 135.19 (s), 134.00 (s), 132.98 (s), 131.59 (s), 129.60 (s), 128.38 (s), 128.07 (s), 114.72 (s). ppm; **HRMS (ESI, m/z):** calcd for C<sub>14</sub>H<sub>10</sub>O<sub>3</sub>SNa [M+Na]<sup>+</sup> 281.0248, found: 281.0253.

### 3-oxo-3-phenylprop-1-en-2-yl furan-2-carboxylate:

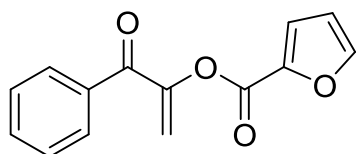

3w

**<sup>1</sup>H NMR (400 MHz, CDCl<sub>3</sub>):** δ 7.90 (dt, J = 8.4, 1.6 Hz, 2H), 7.65 (dt, J = 6.3, 3.1 Hz, 1H), 7.62 – 7.55 (m, 1H), 7.50 – 7.44 (m, 2H), 7.36 (dd, J = 3.6, 0.8 Hz, 1H), 6.57 (dd, J = 3.5, 1.7 Hz, 1H), 5.88 (d, J = 2.3 Hz, 1H), 5.72 (d, J = 2.3 Hz, 1H). ppm; **<sup>13</sup>C NMR (100 MHz, CDCl<sub>3</sub>):** δ 189.24 (s), 156.12 (s), 150.58 (s), 147.43 (s), 143.13 (s), 136.11 (s), 132.98 (s), 129.57 (s), 128.39 (s), 120.16 (s), 115.21 (s), 112.25 (s). ppm; **HRMS (ESI, m/z):** calcd for C<sub>14</sub>H<sub>10</sub>O<sub>4</sub>Na [M+Na]<sup>+</sup> 265.0477, found: 265.0476.

# $^1\text{H}$ and $^{13}\text{C}$ NMR spectra of structurally novel compounds

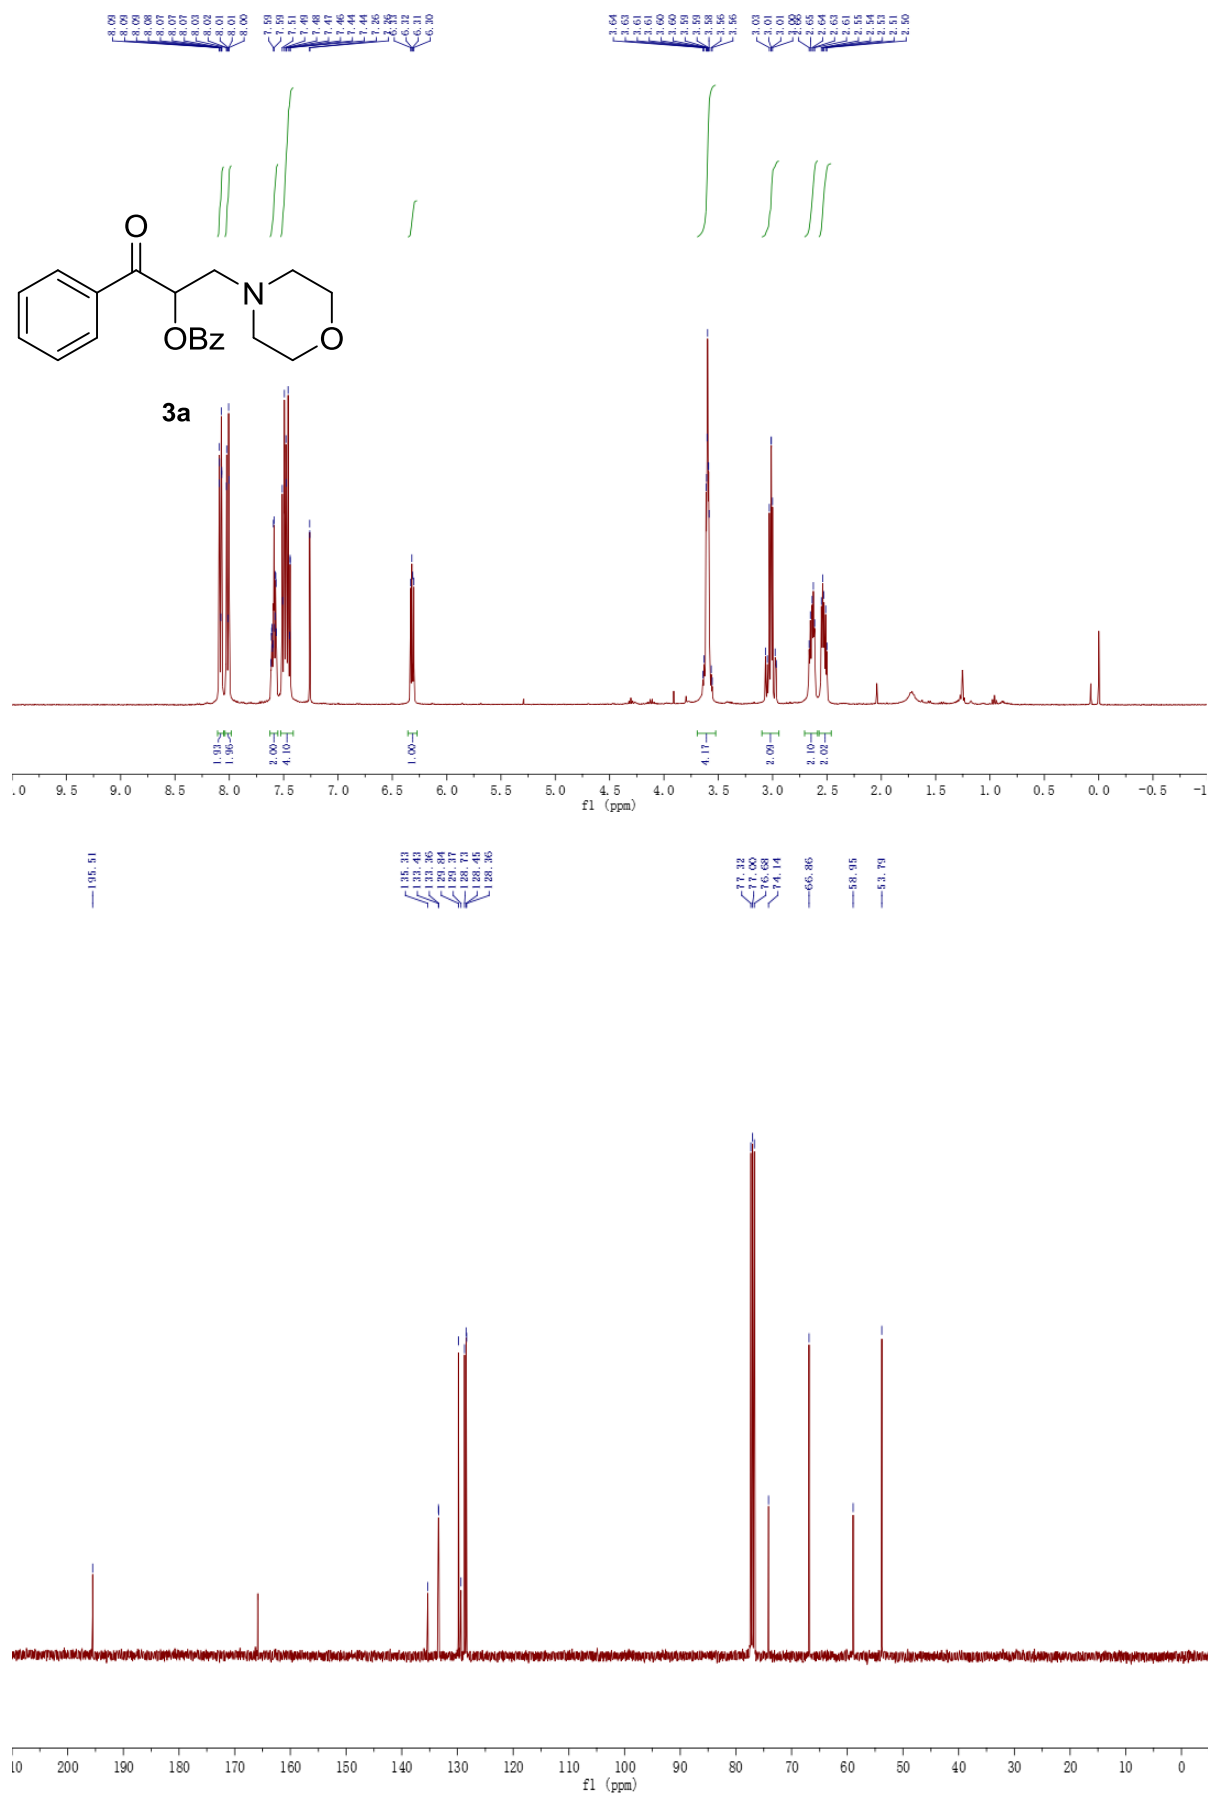

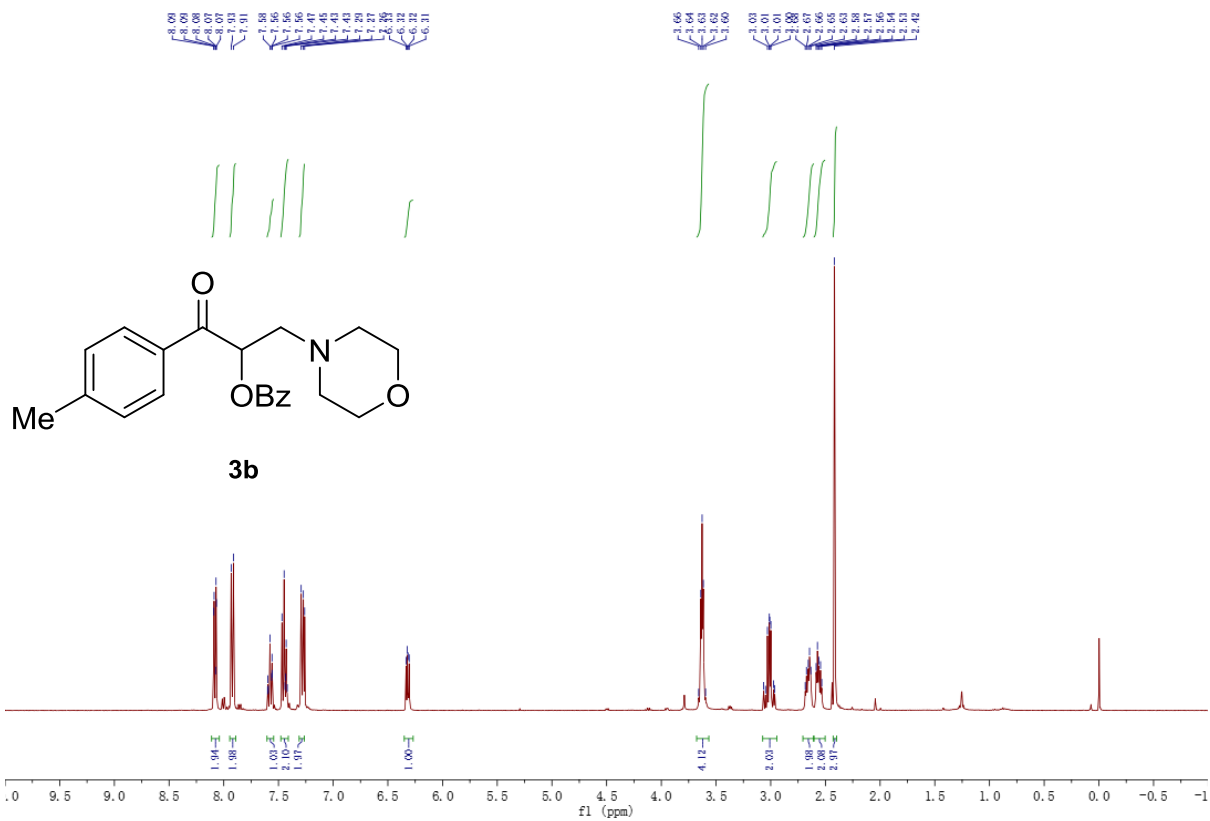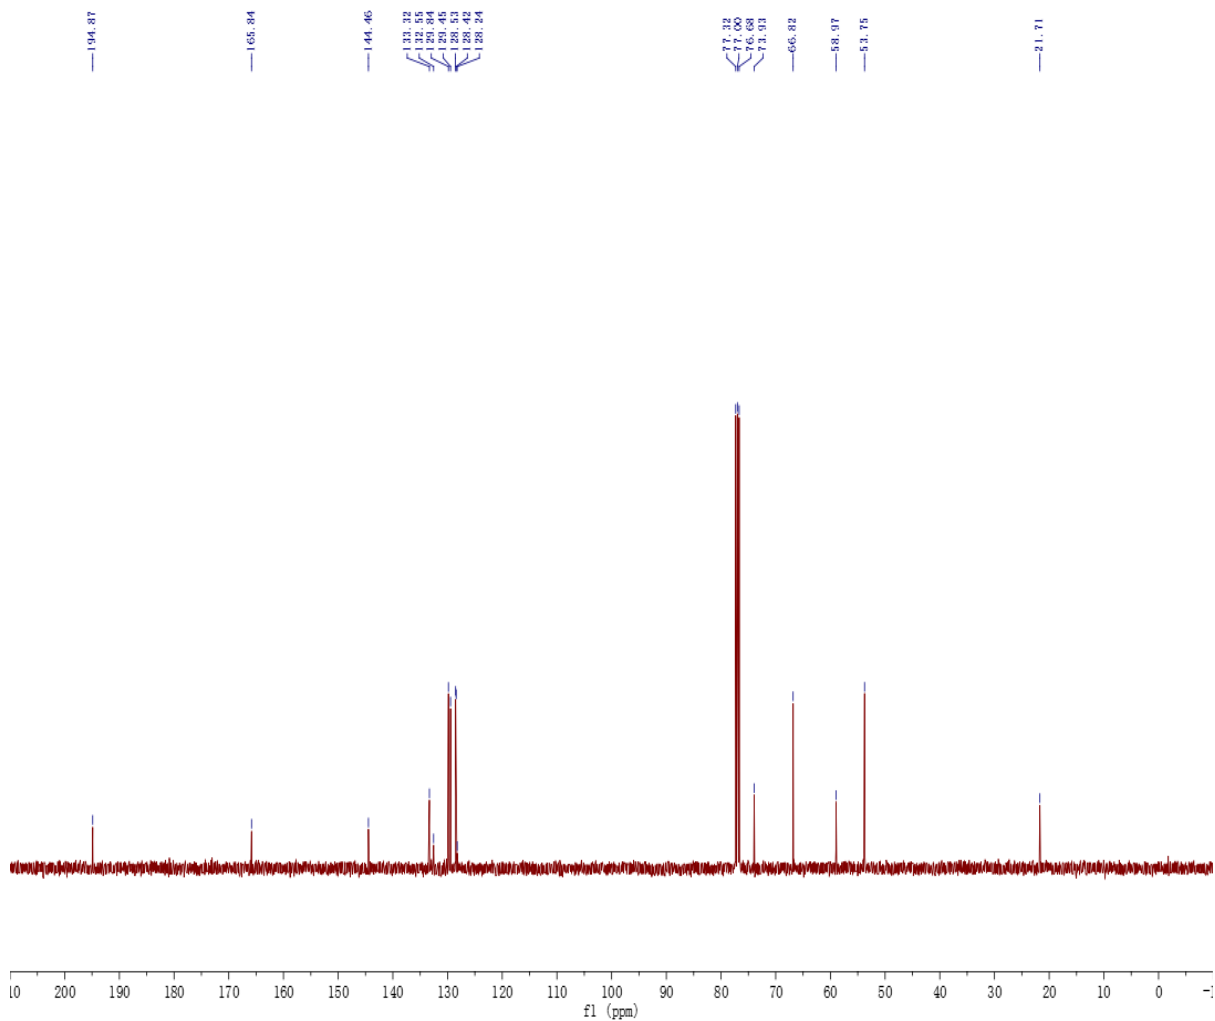

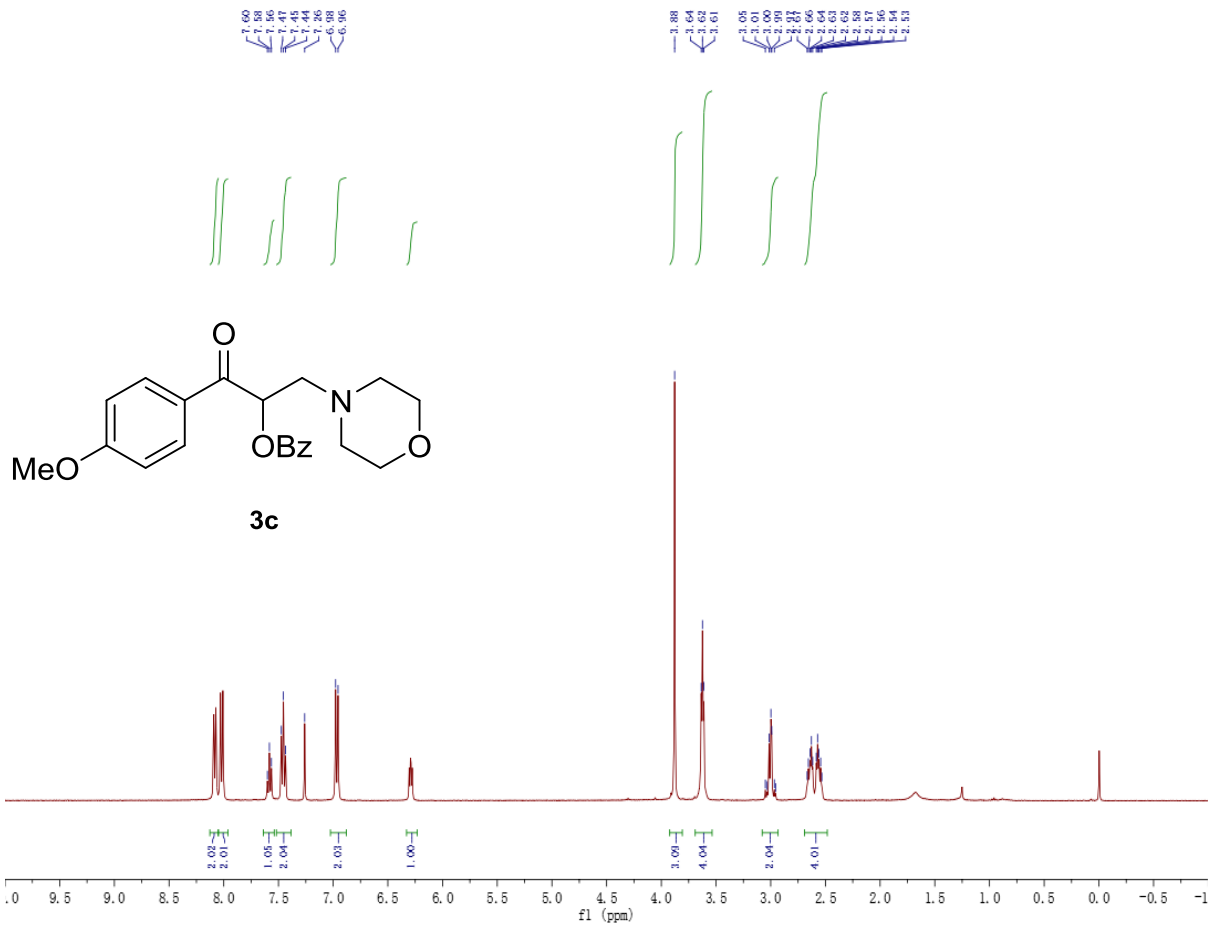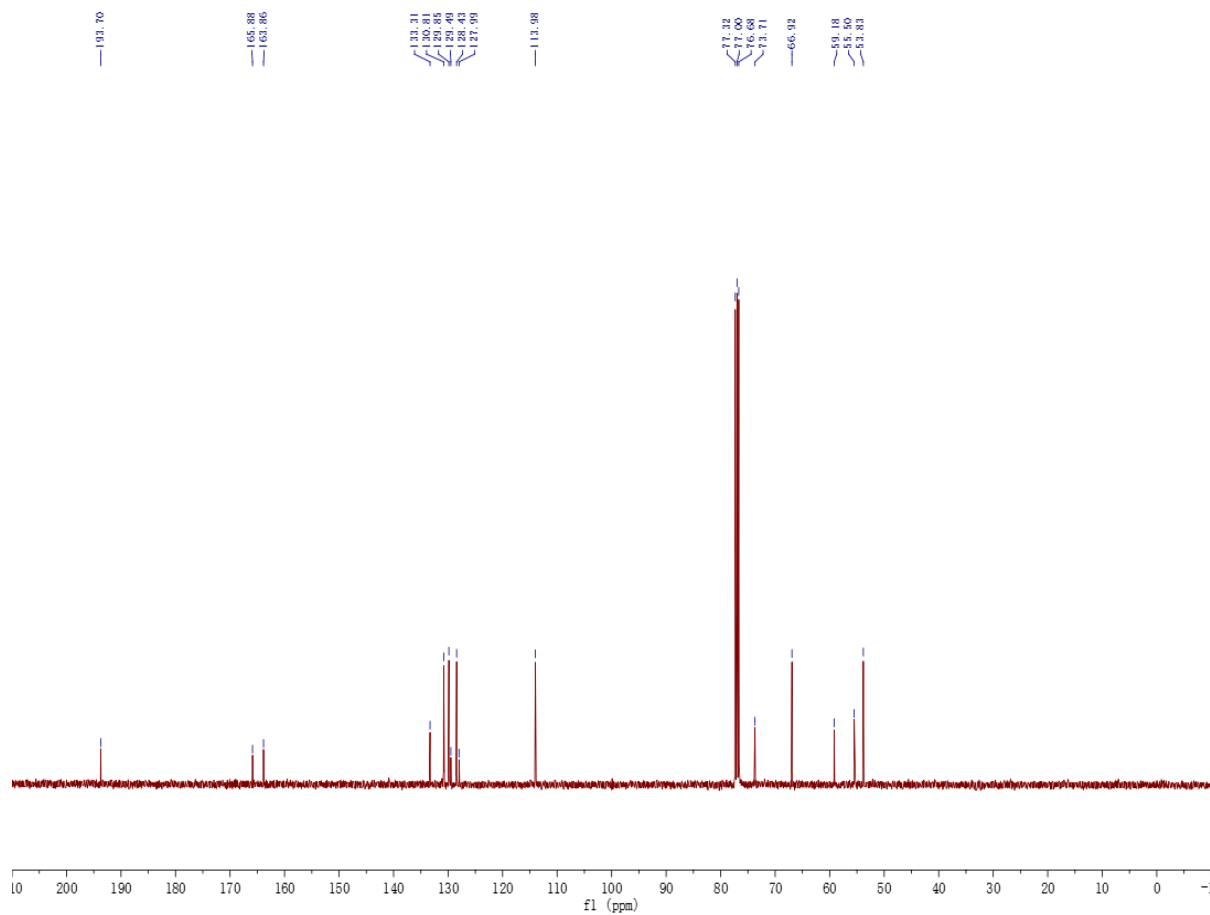



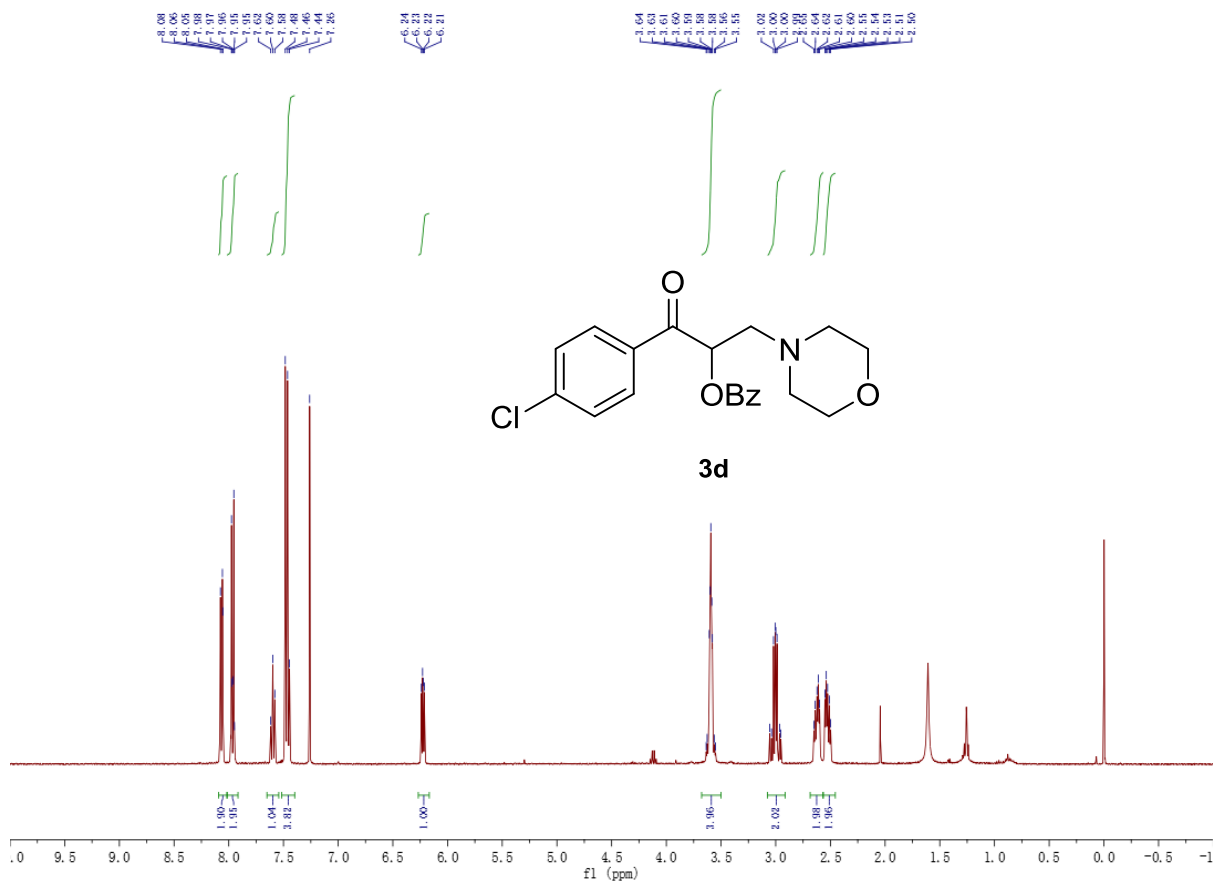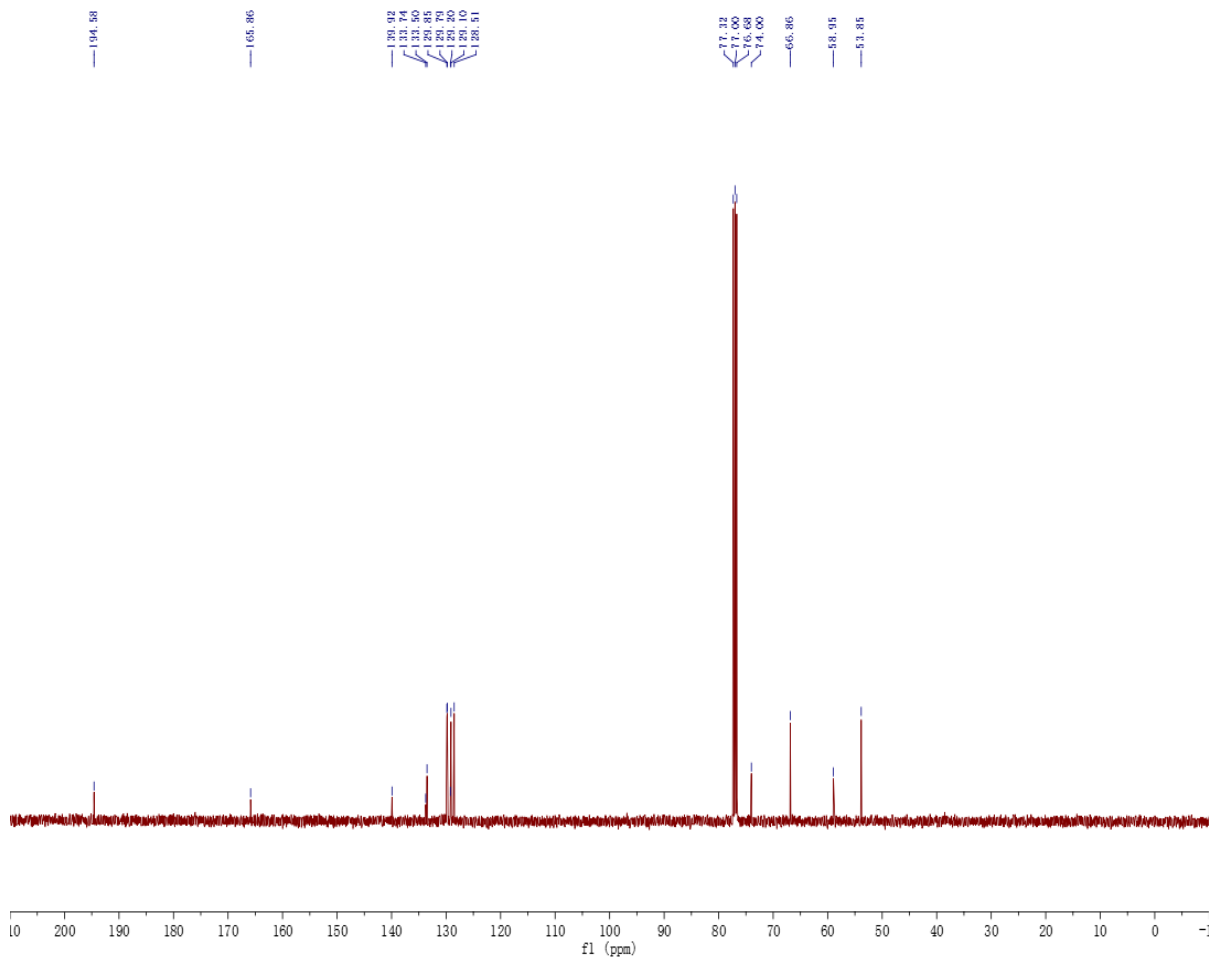

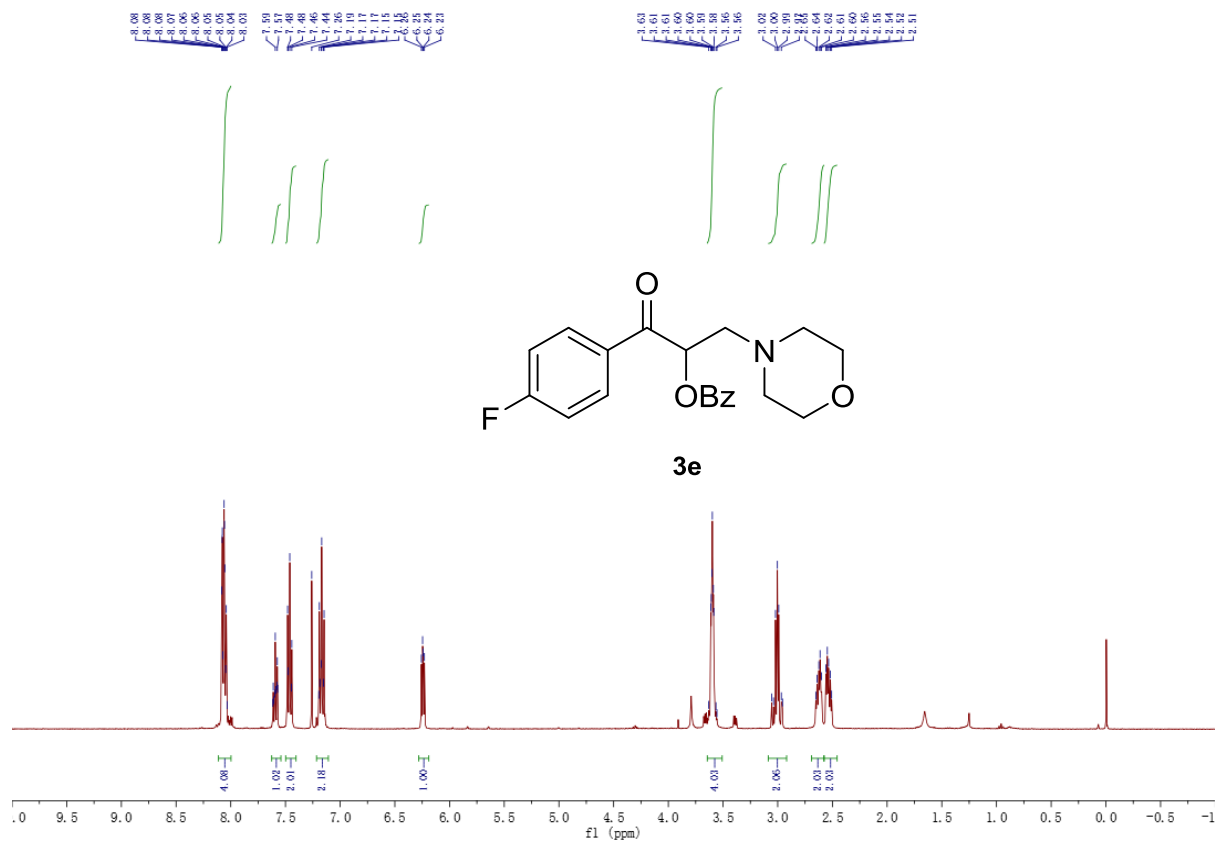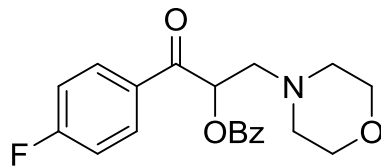

**3e**

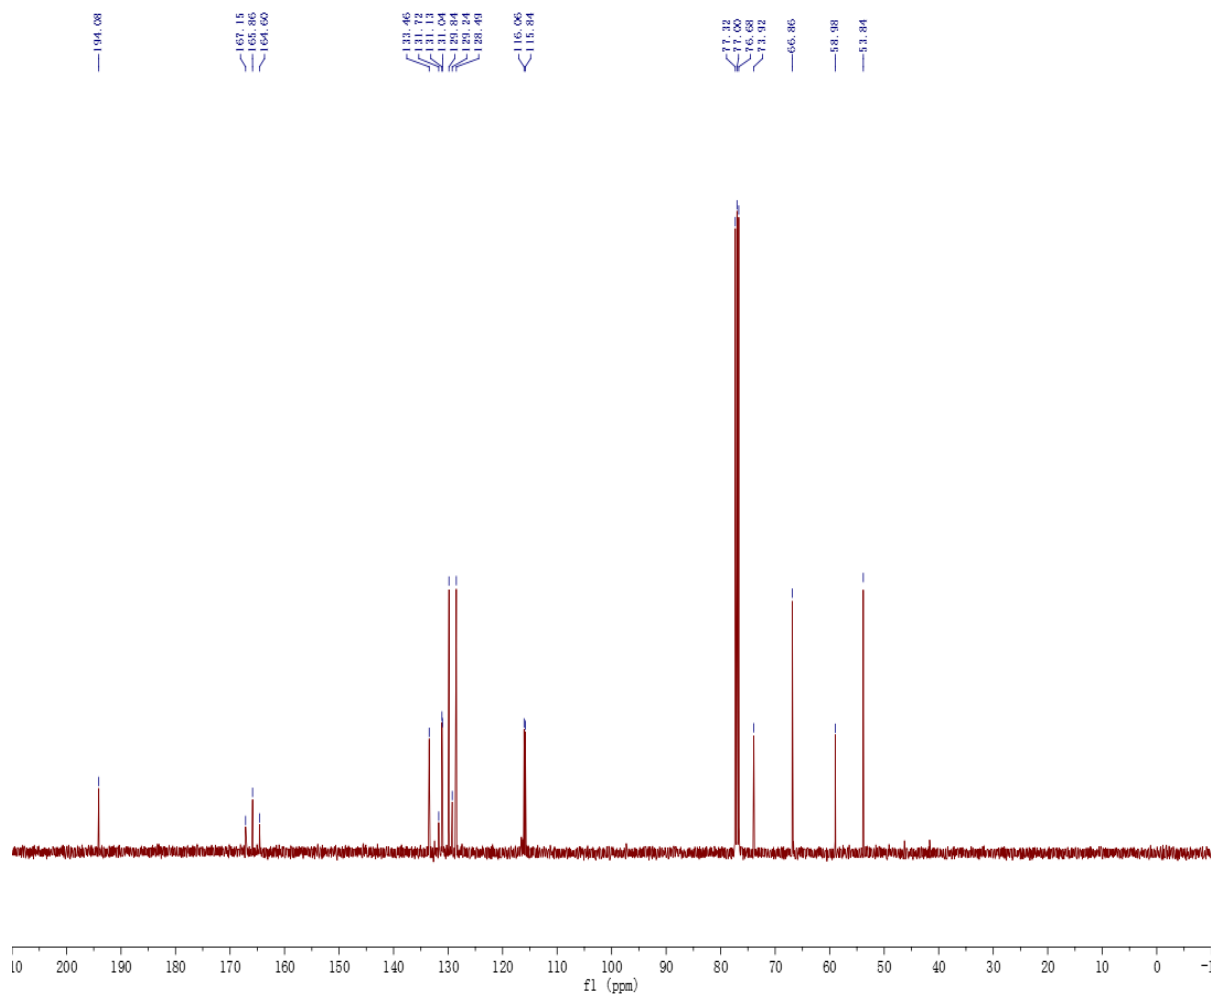

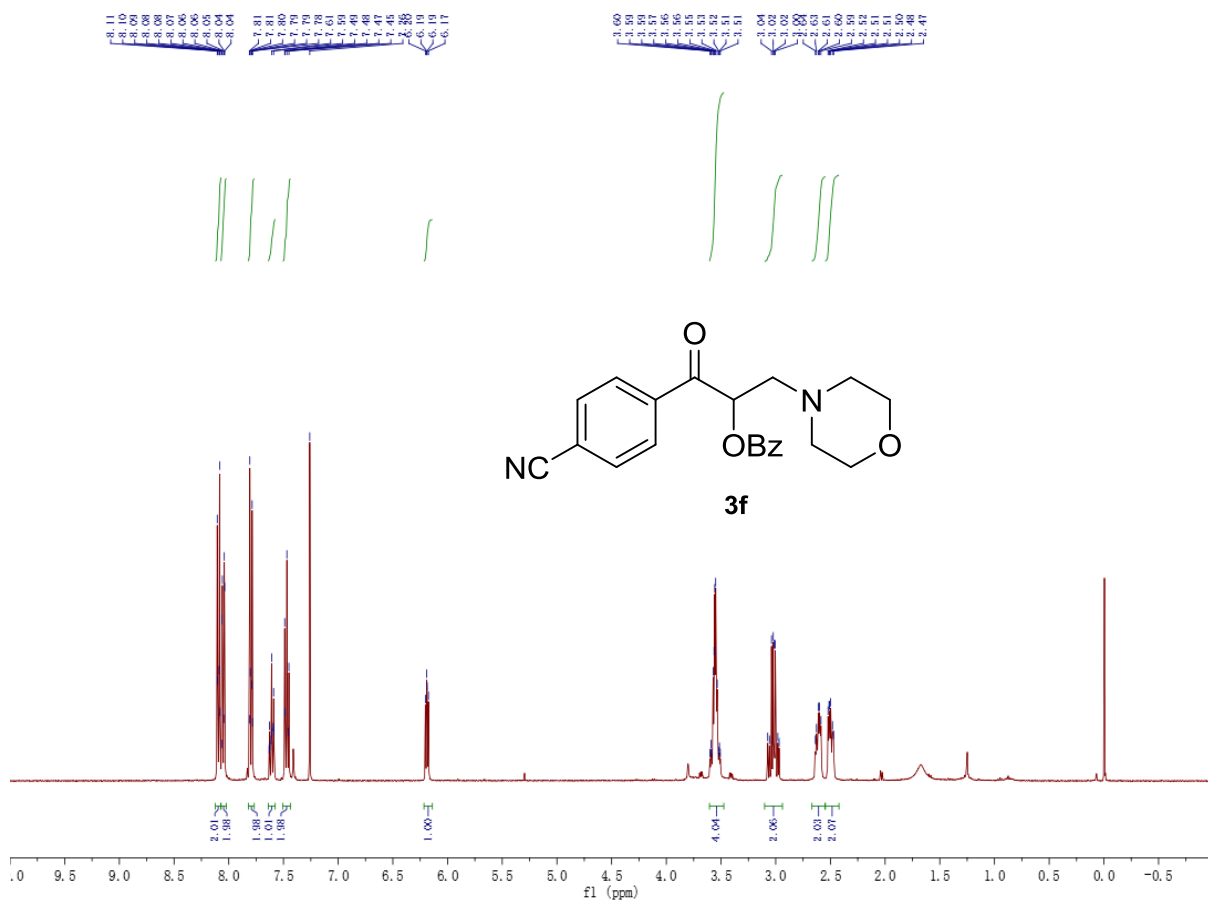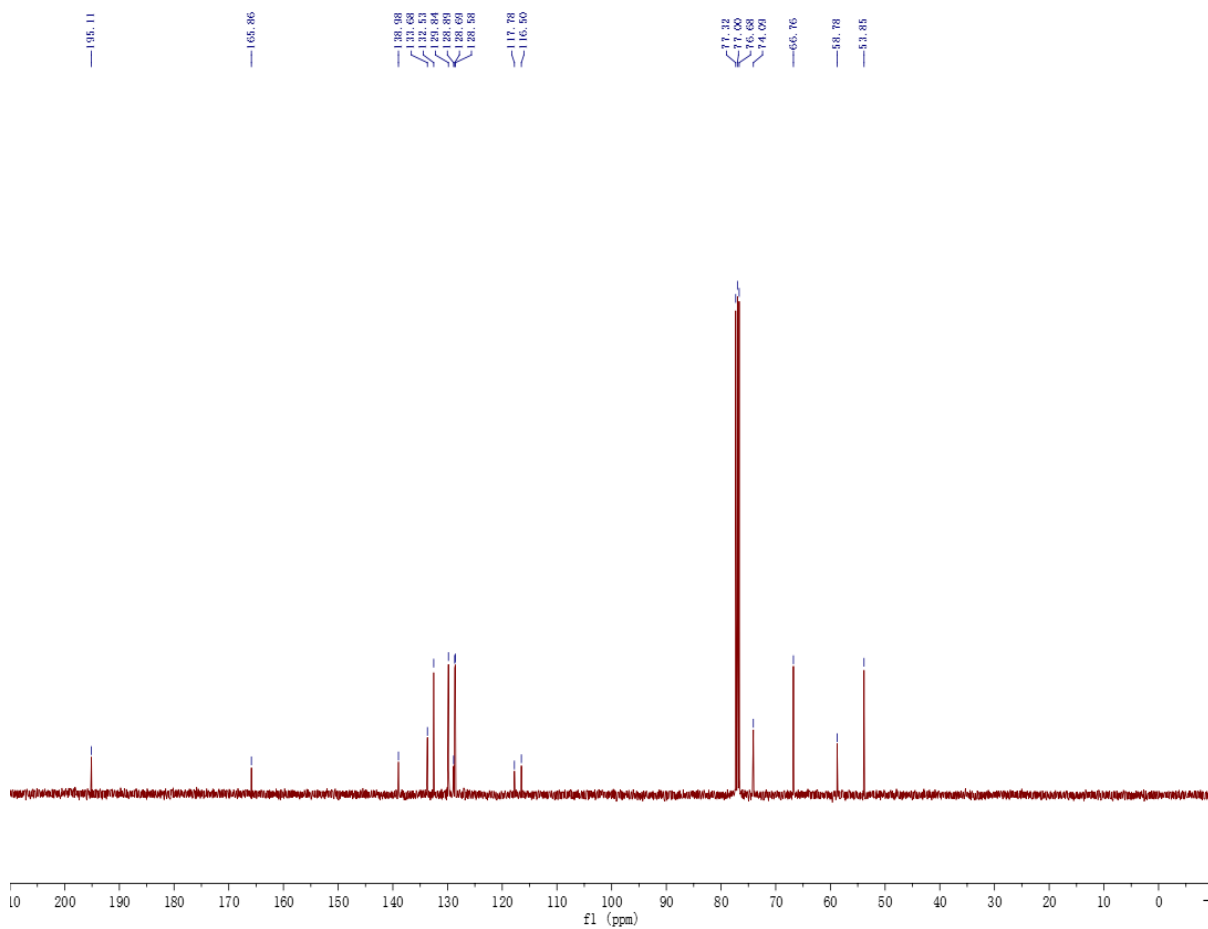

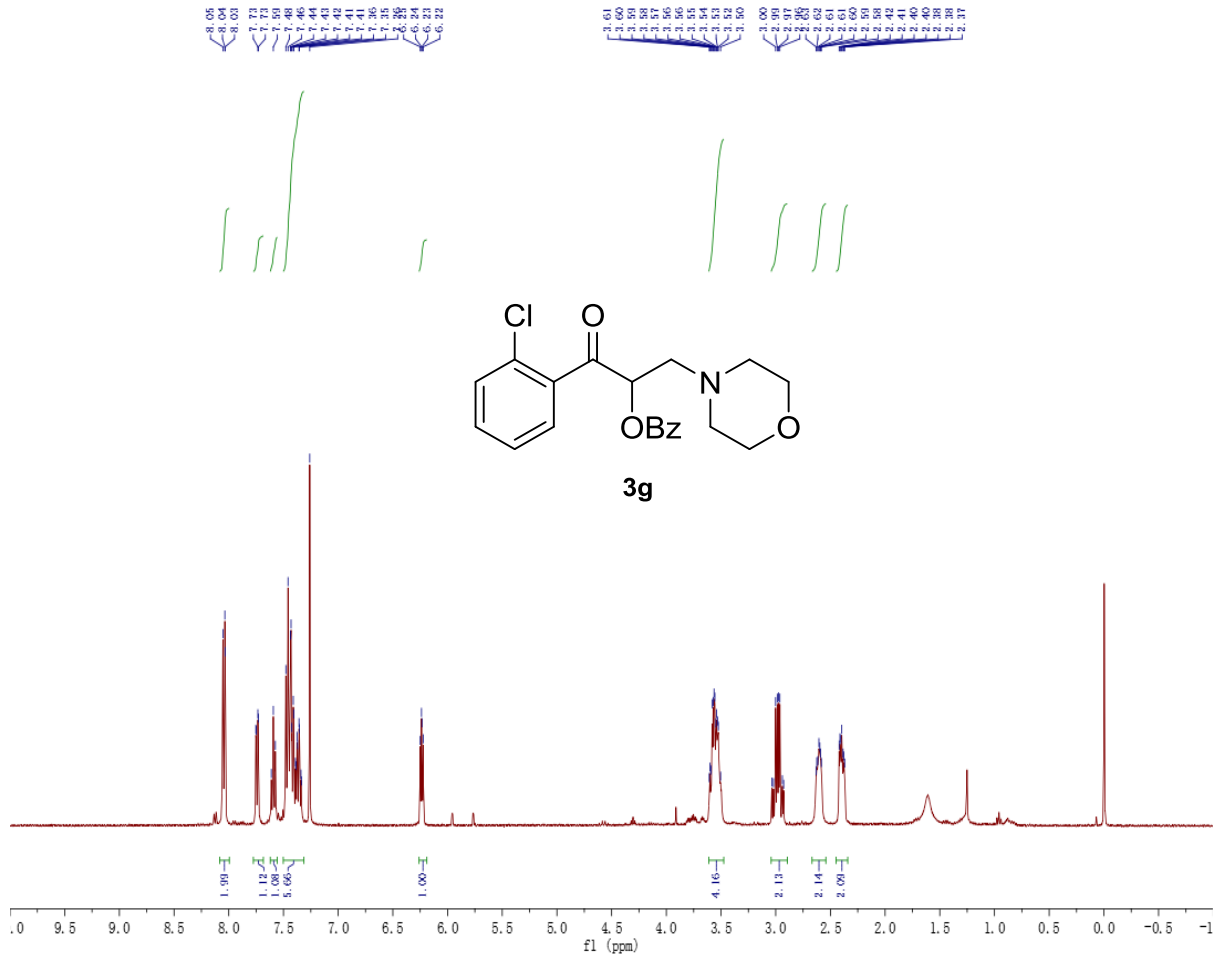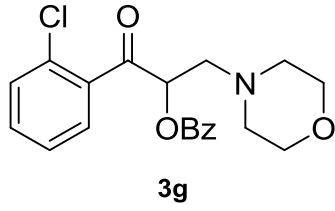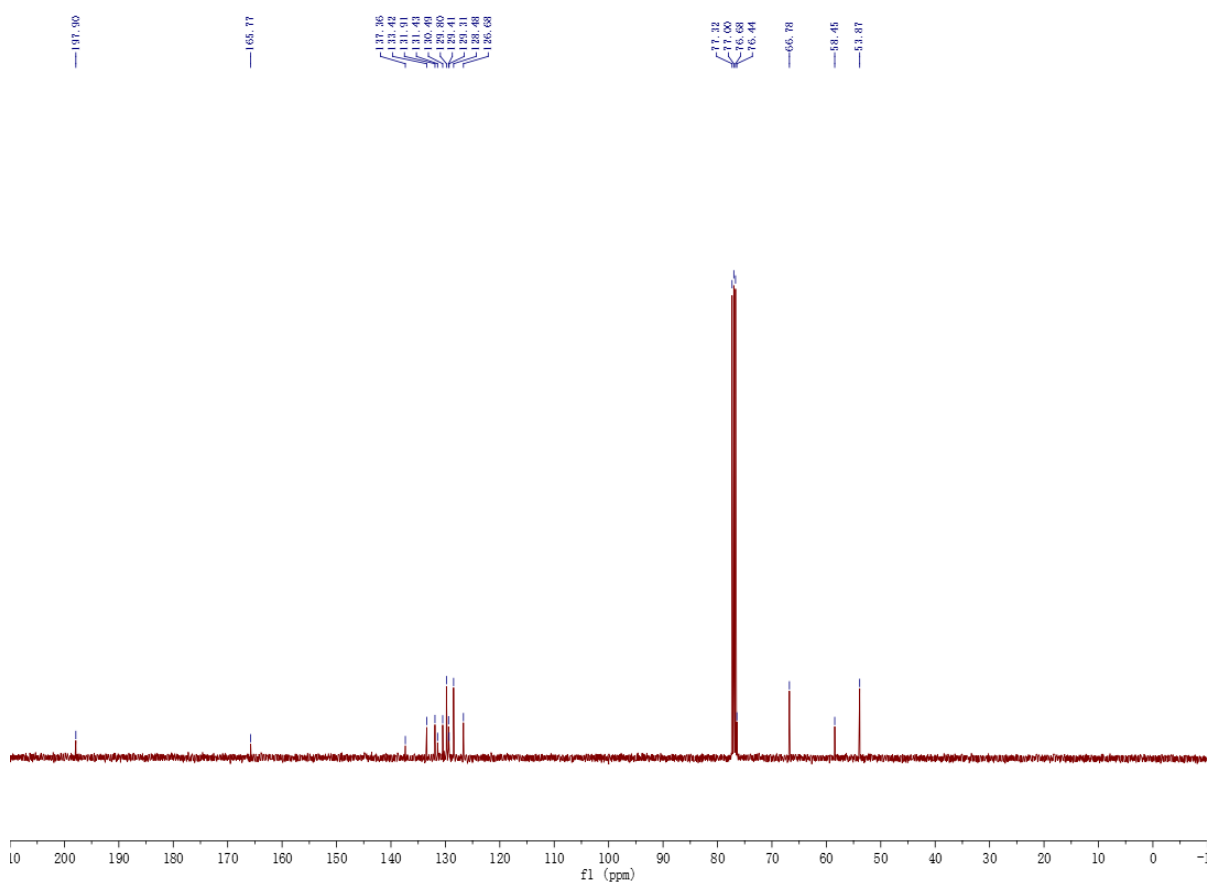

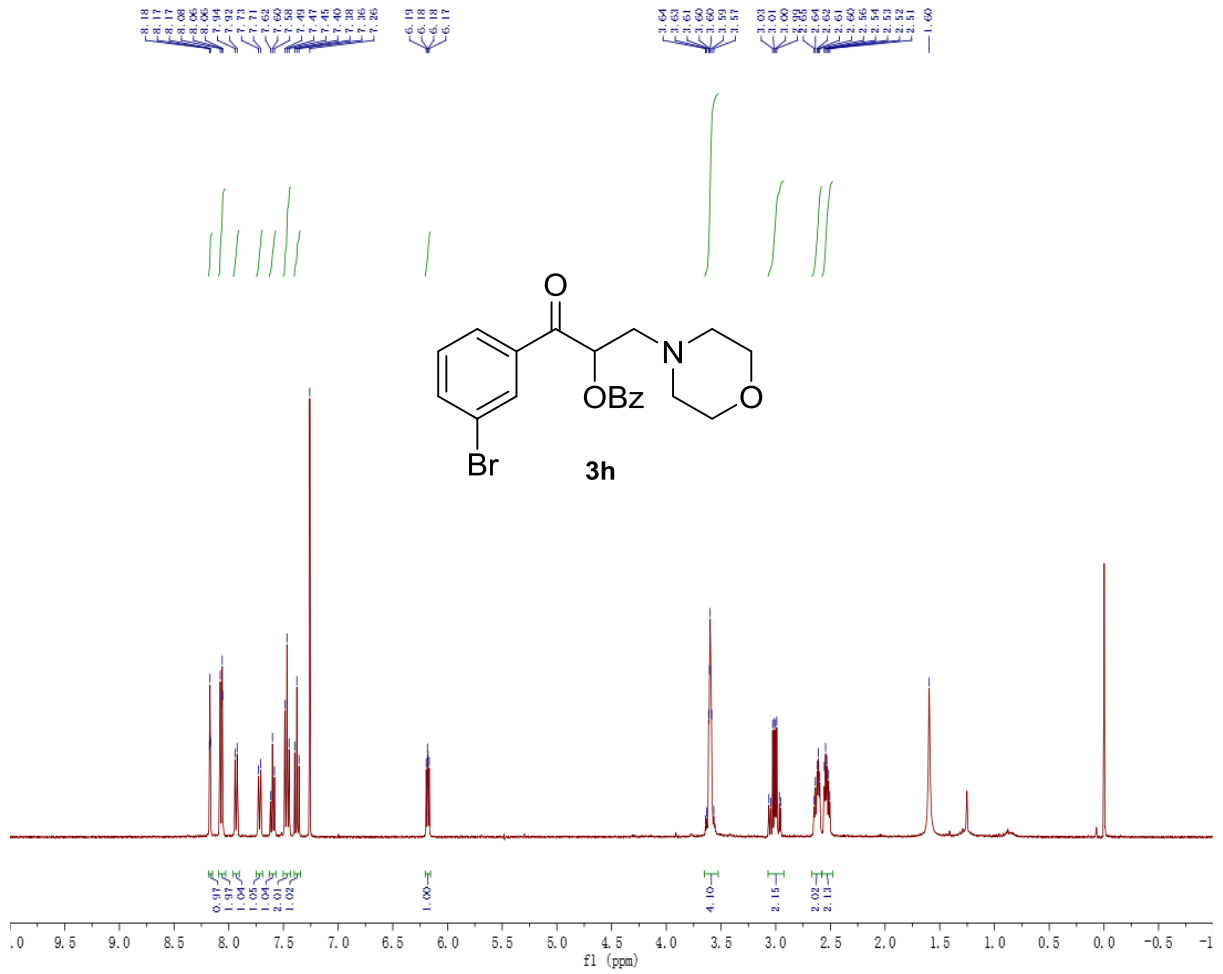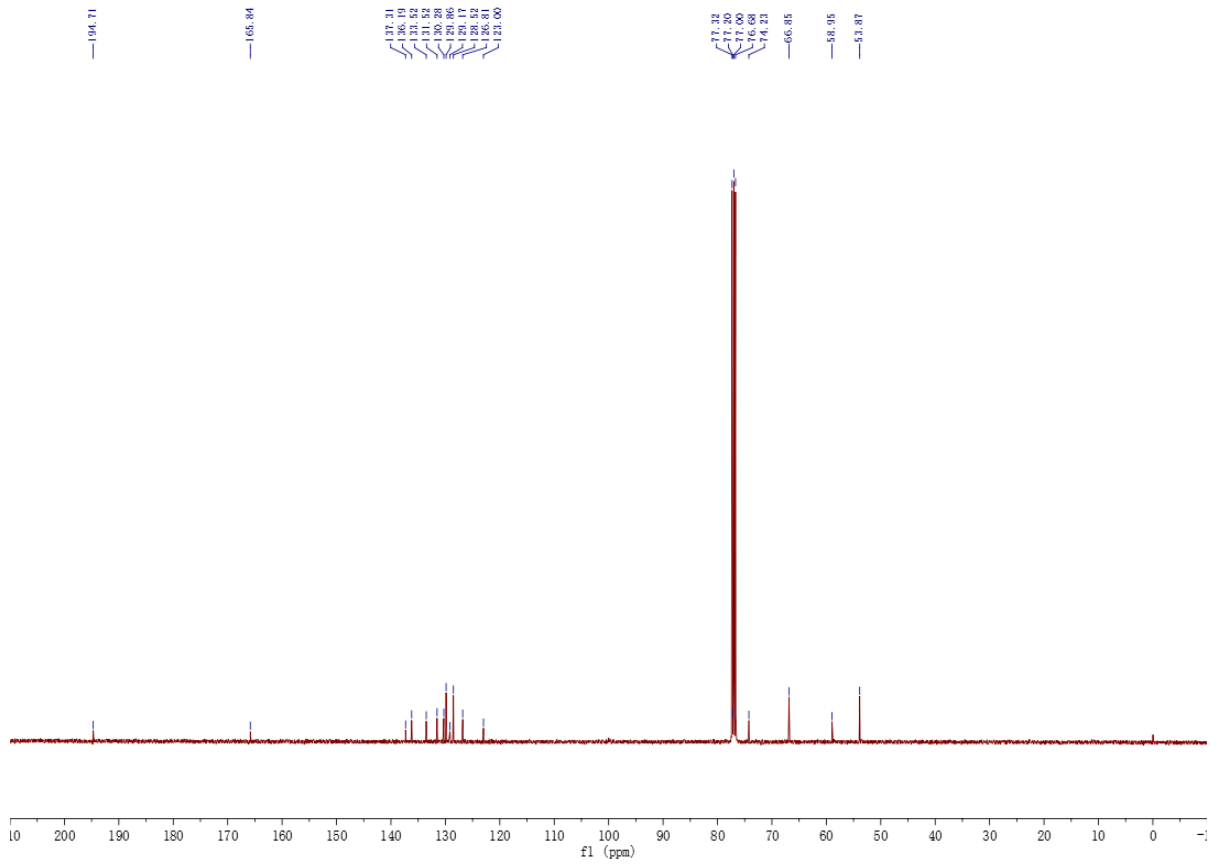

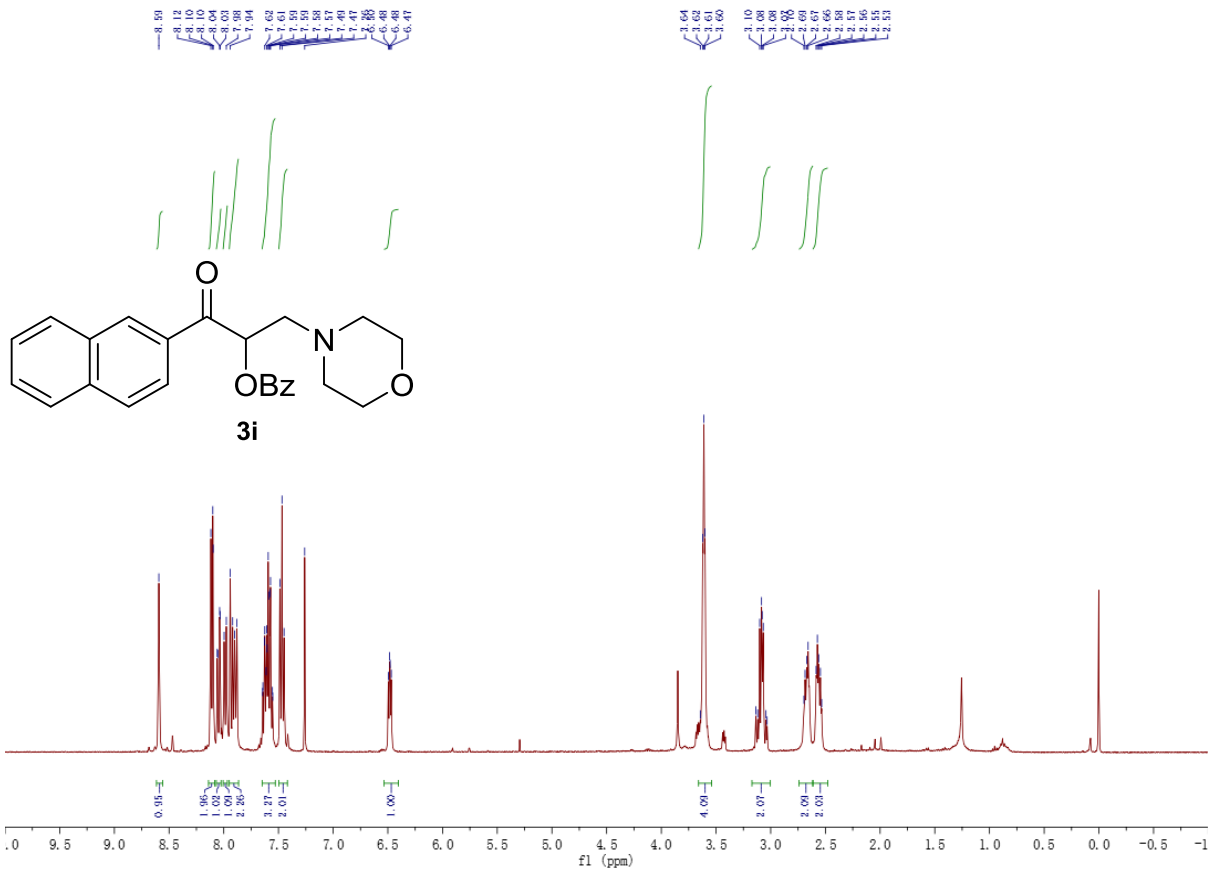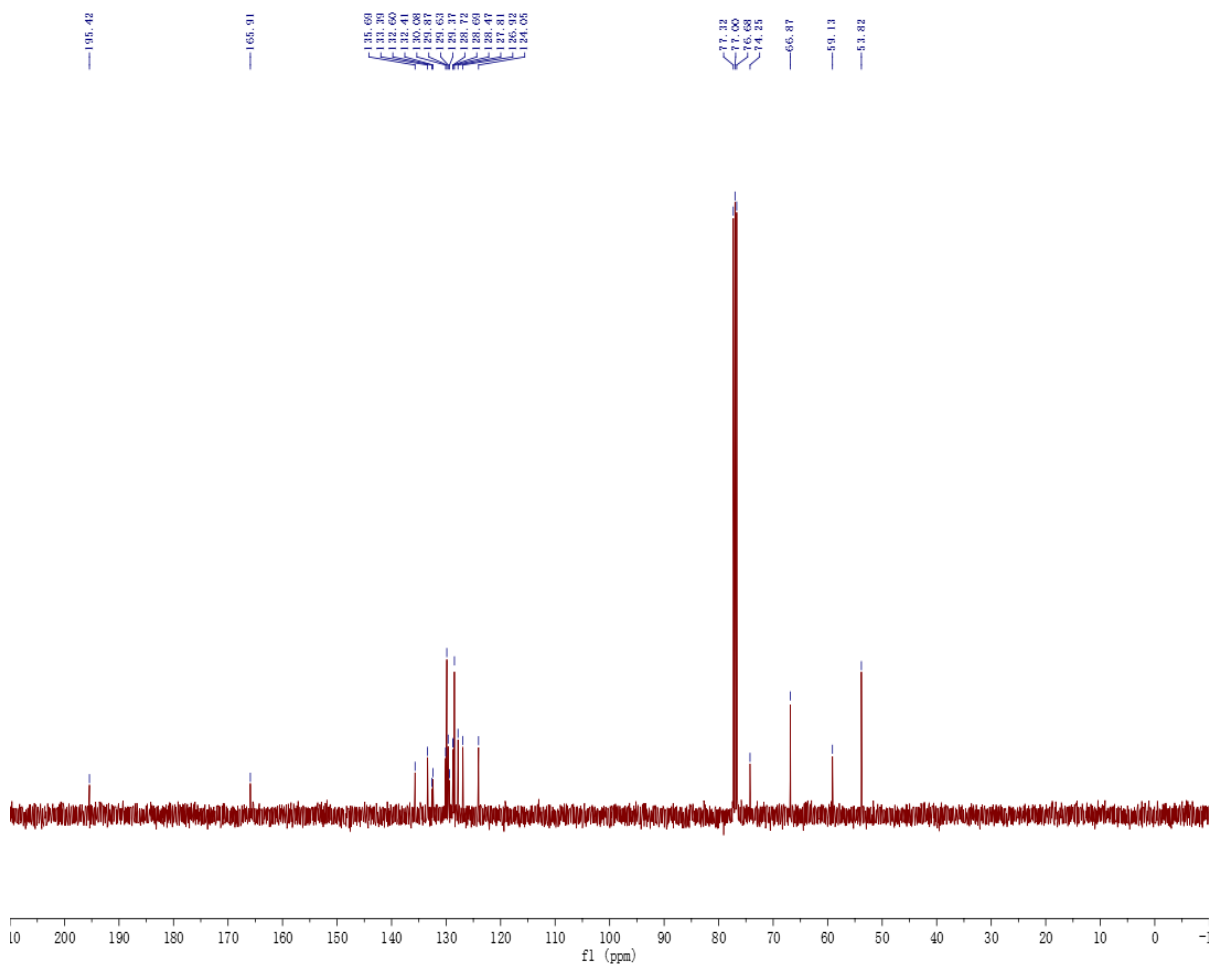

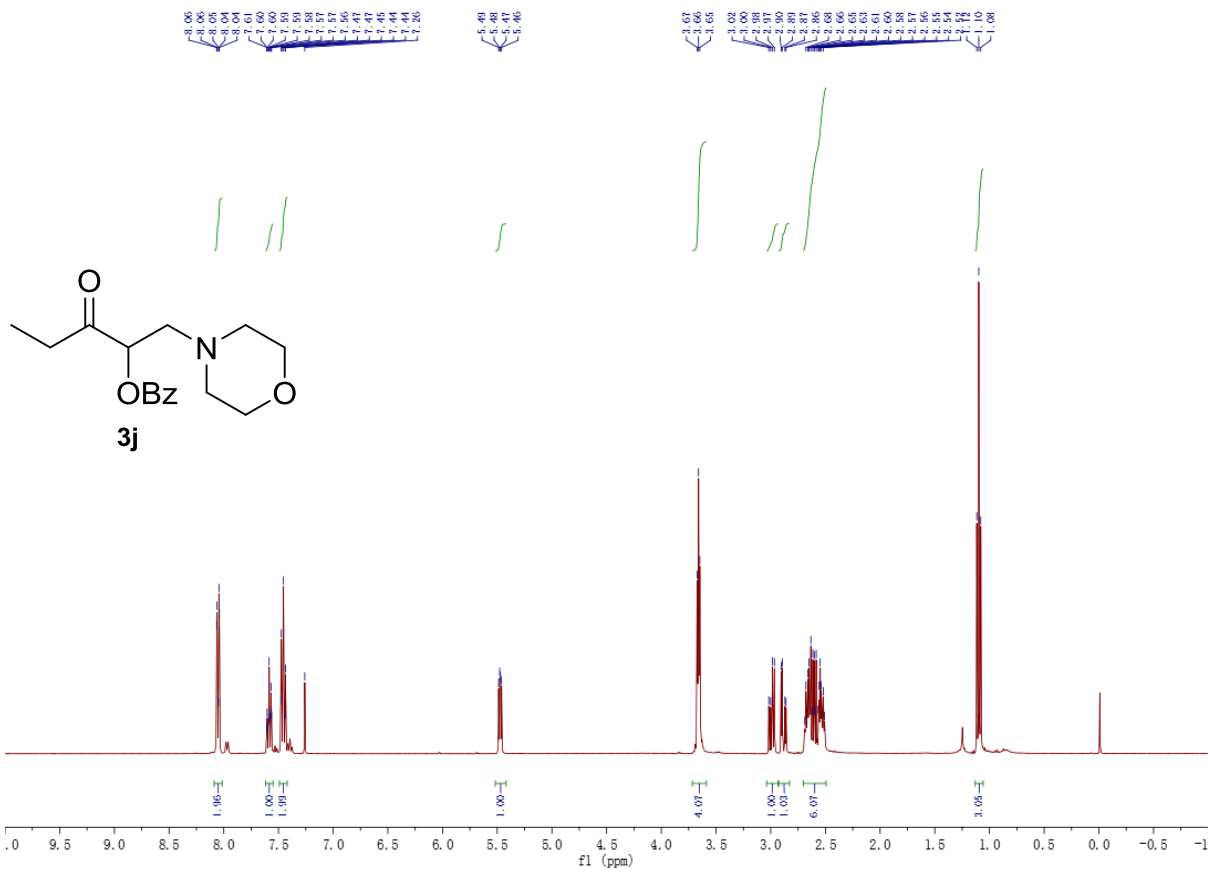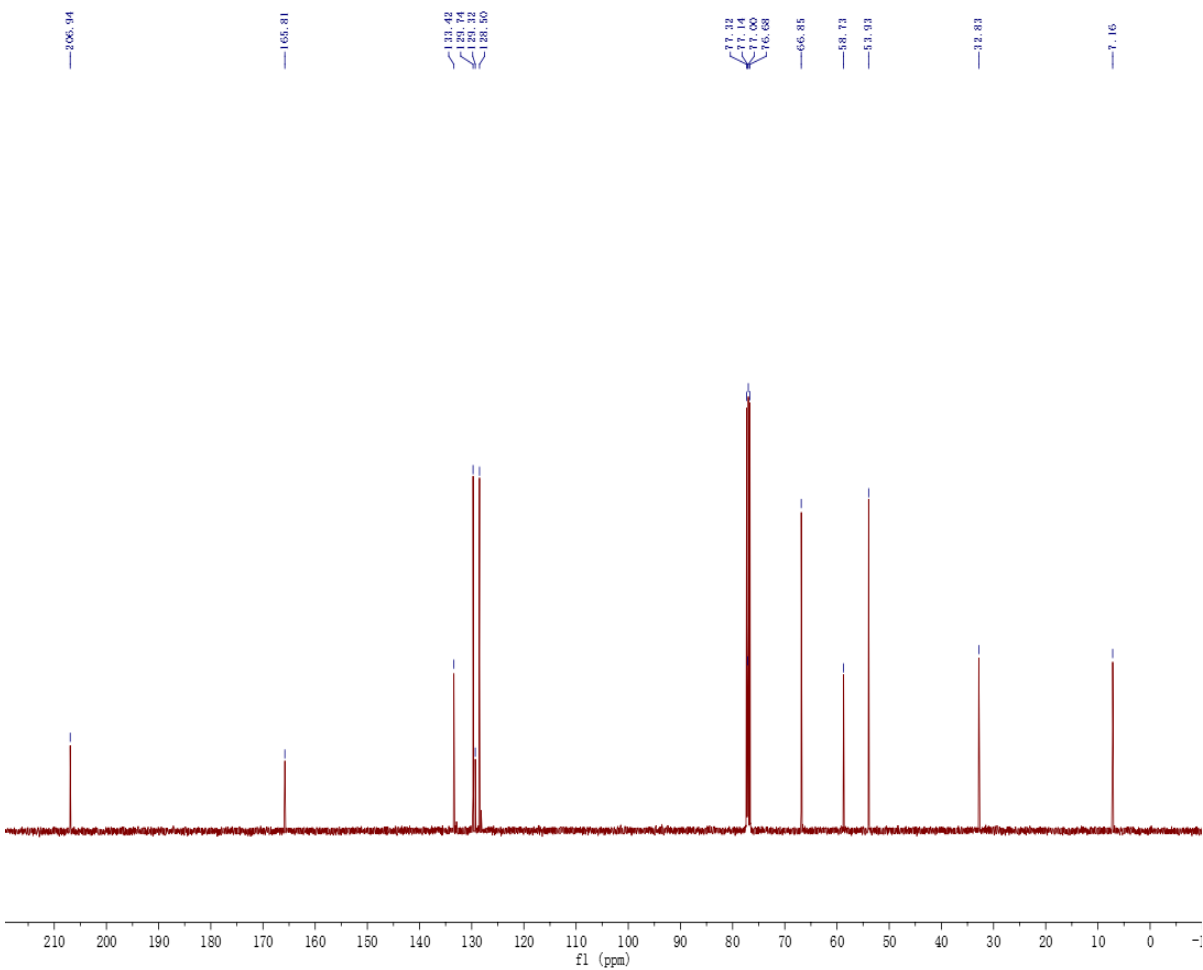

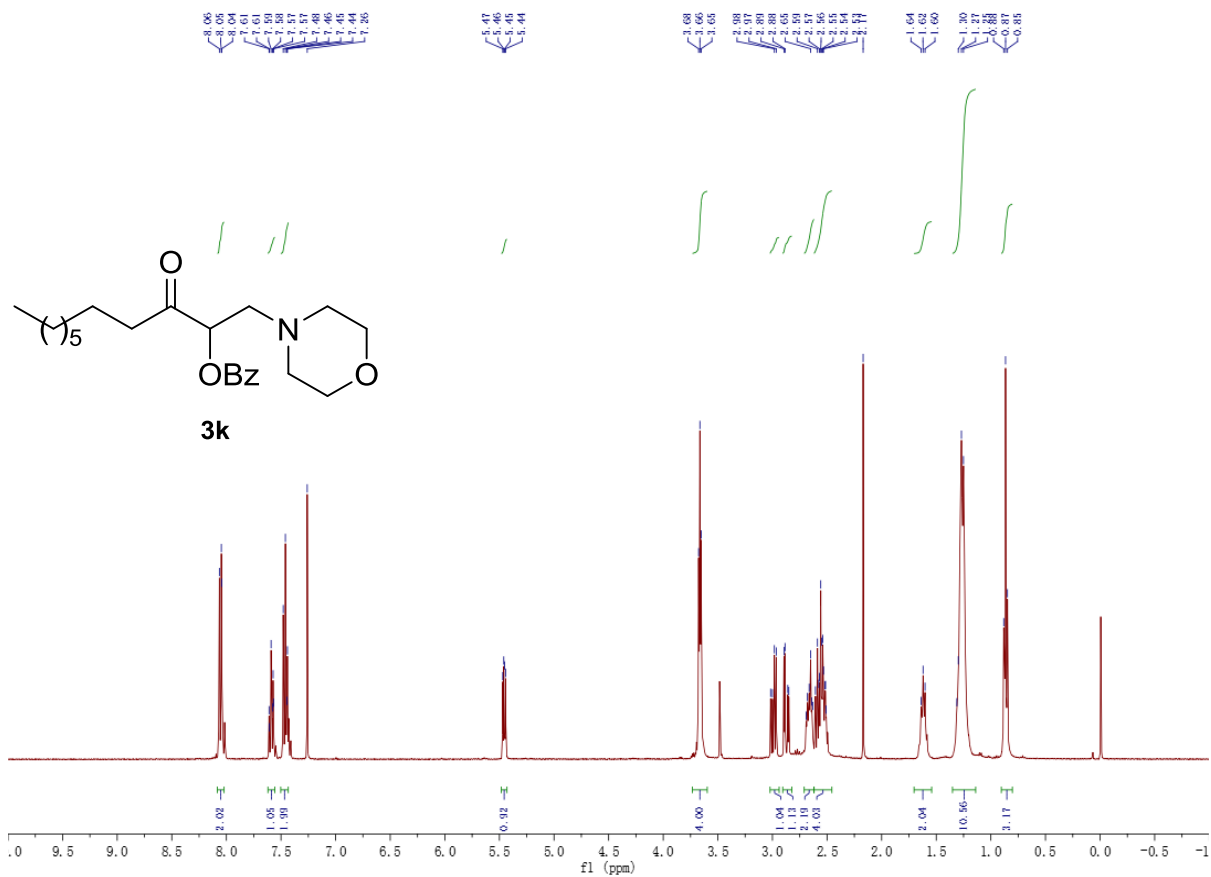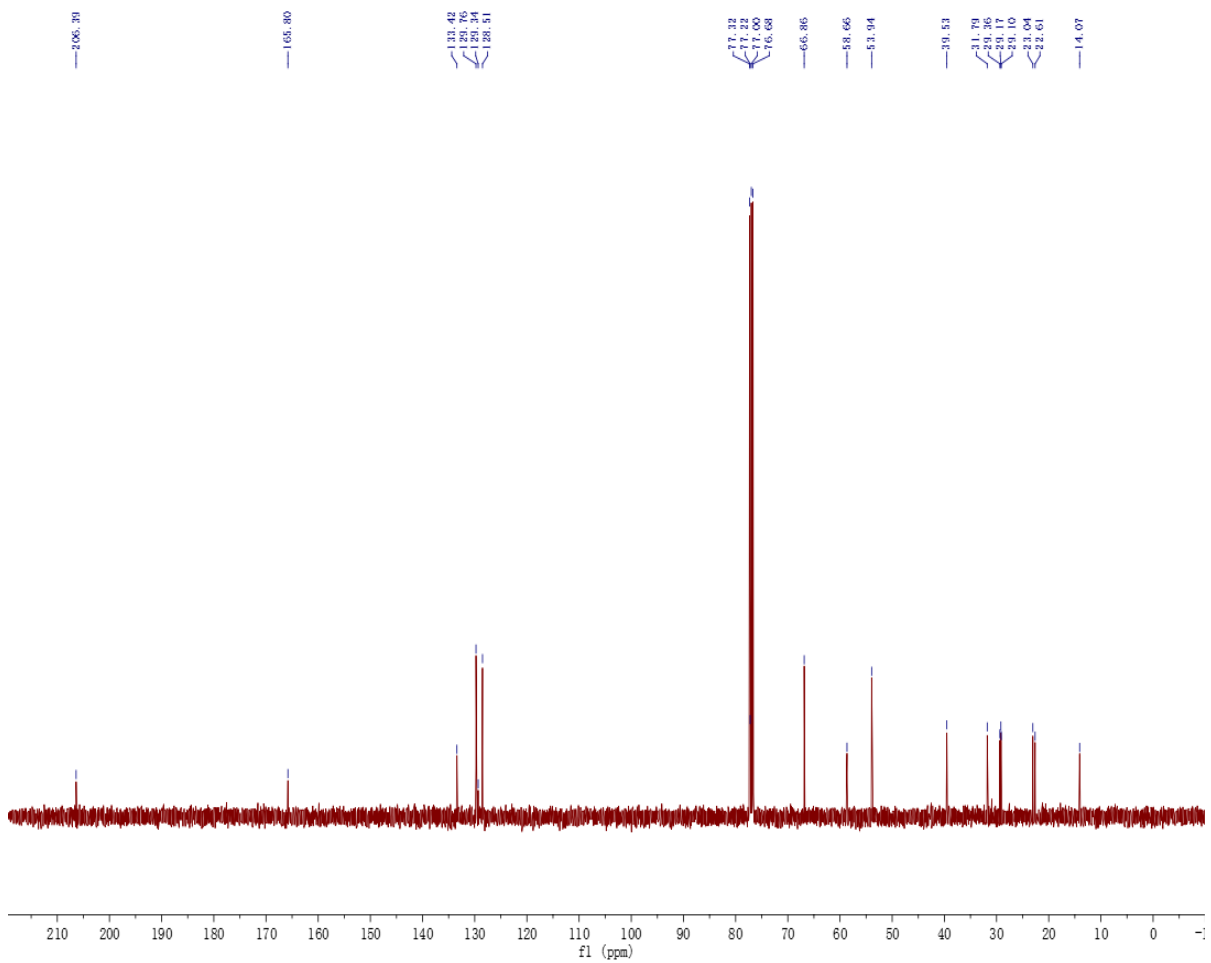



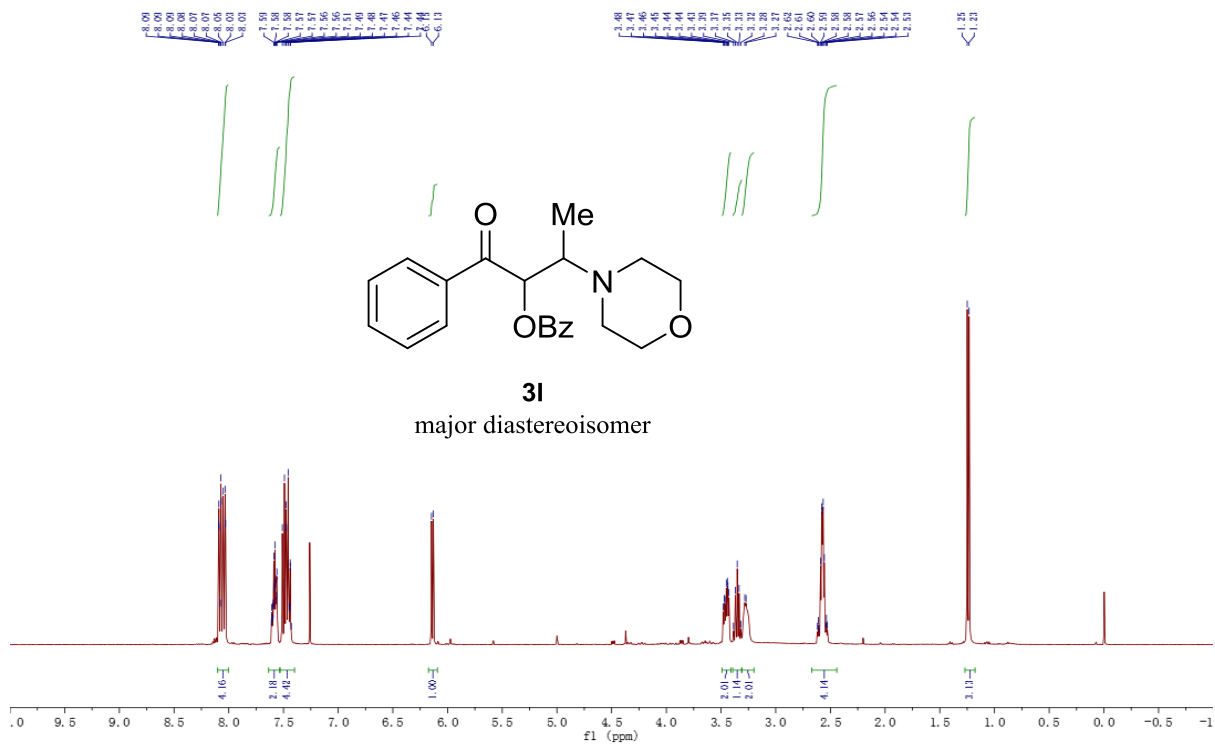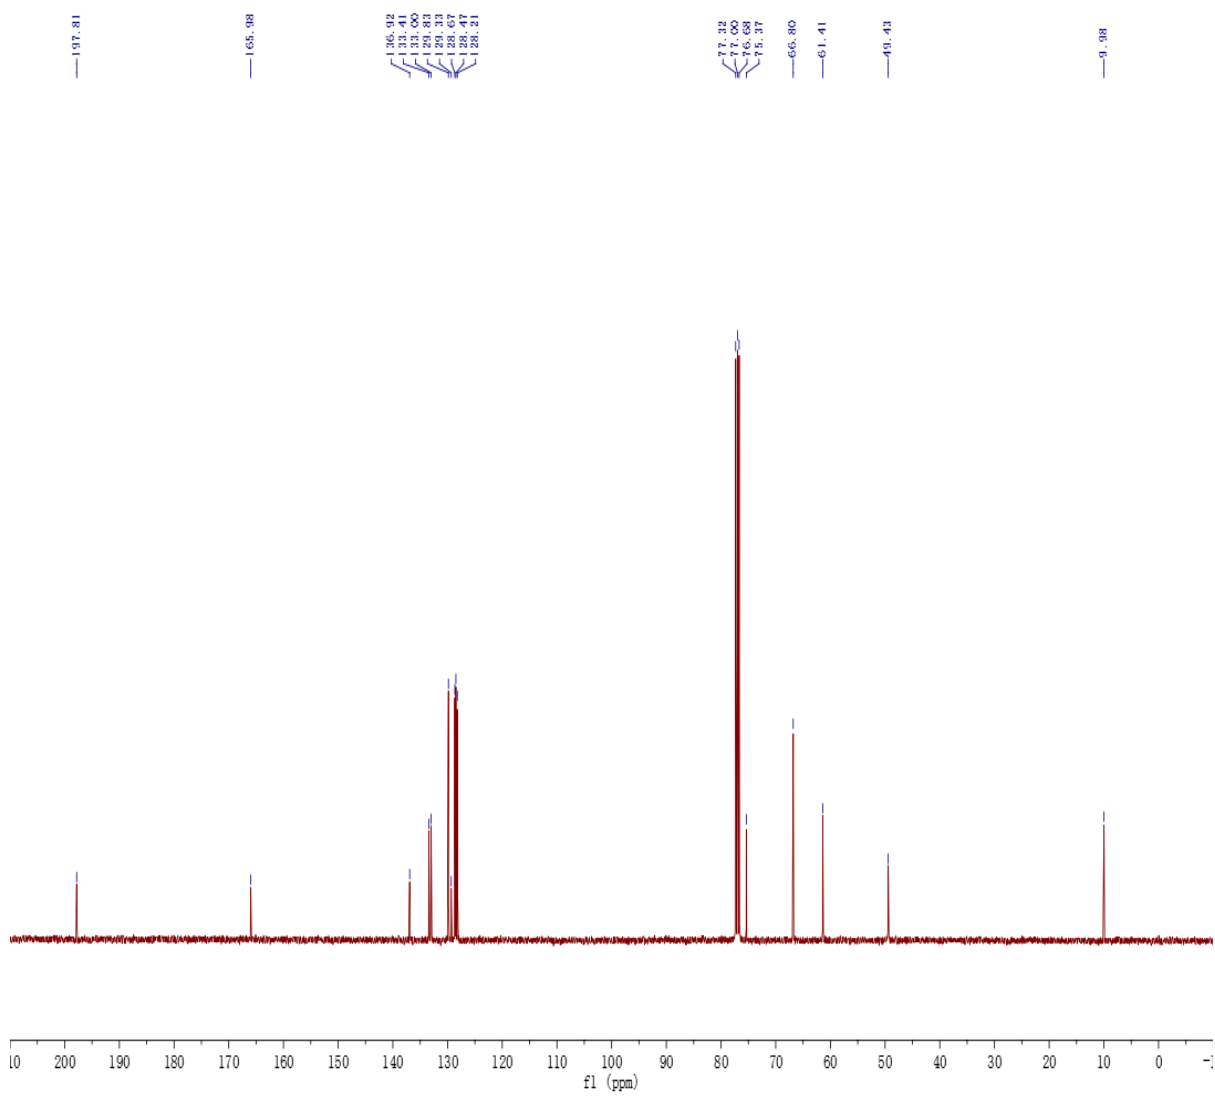

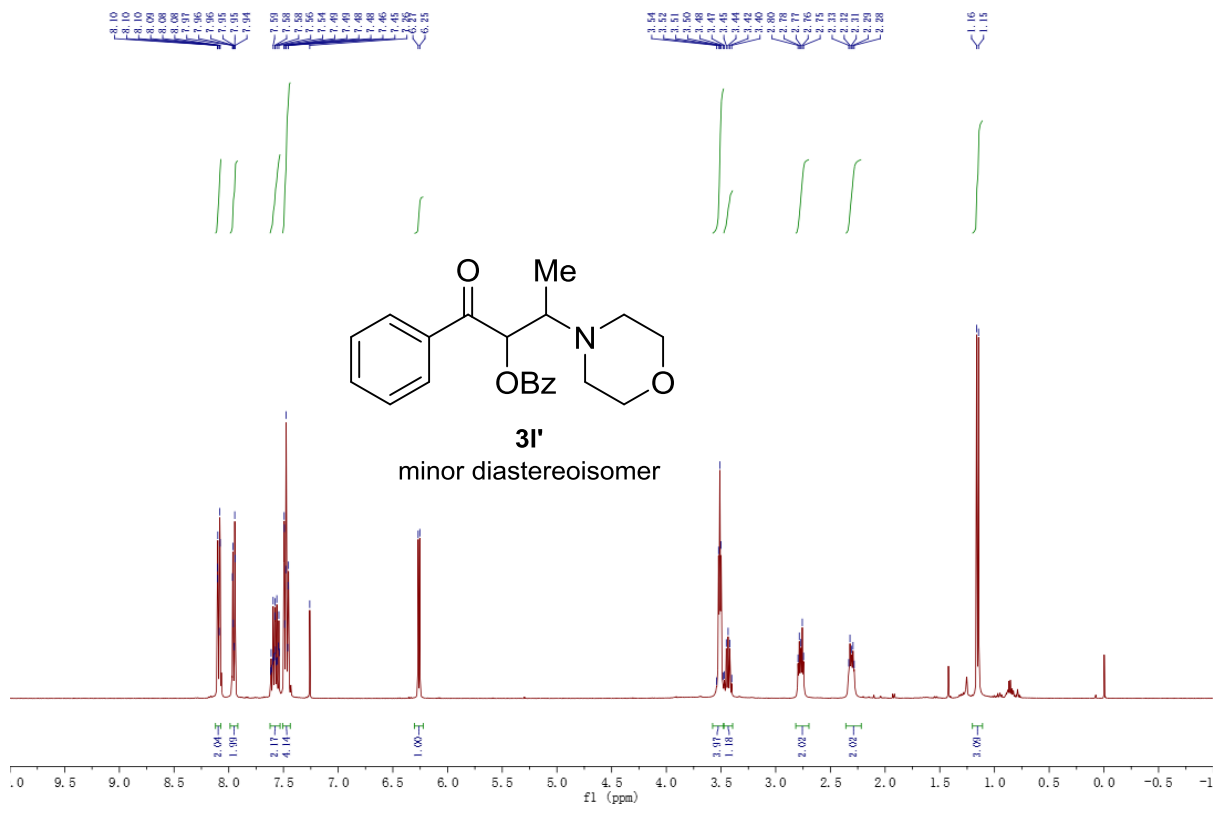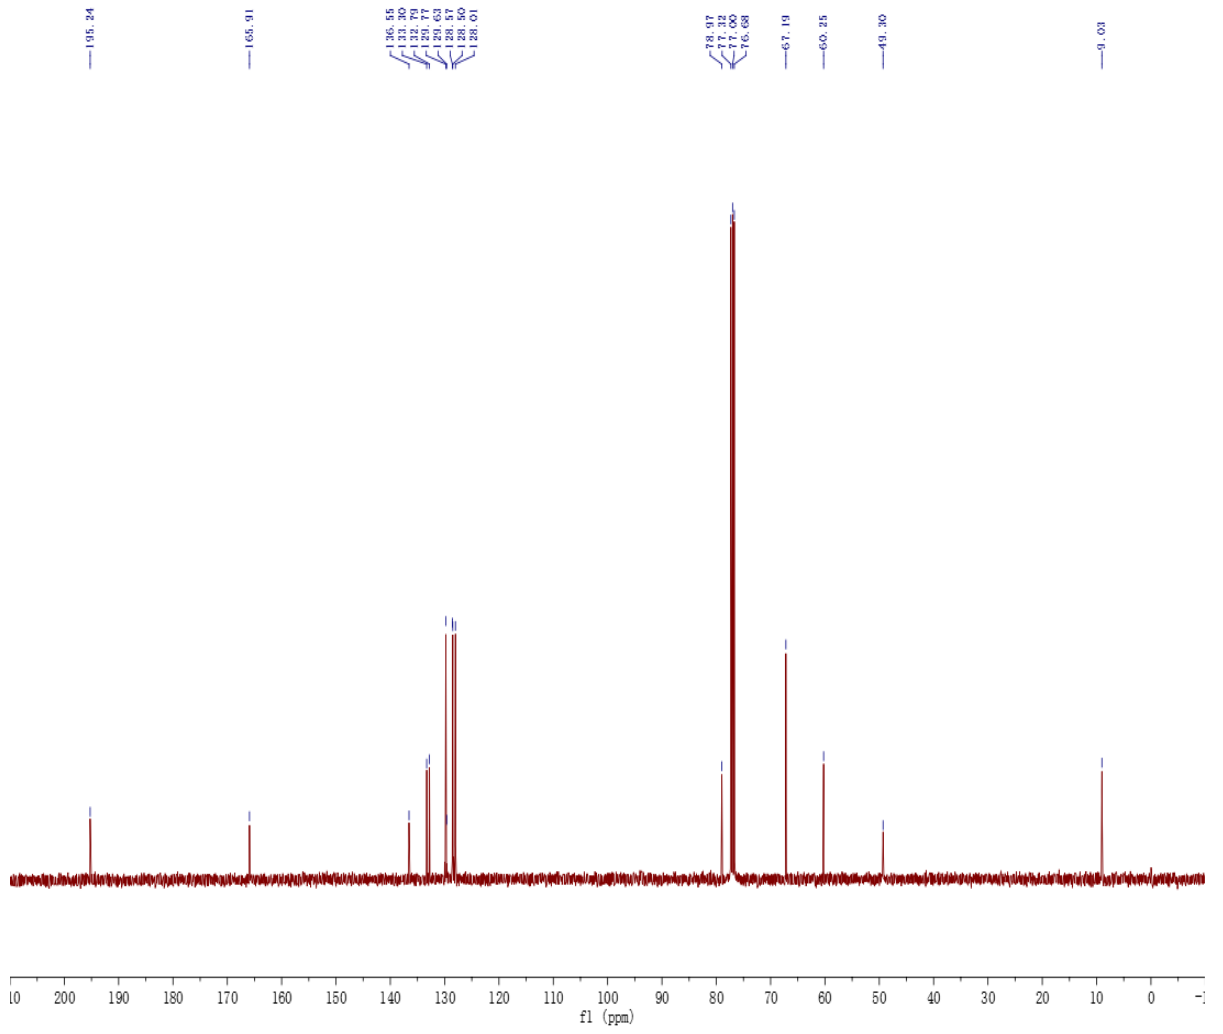

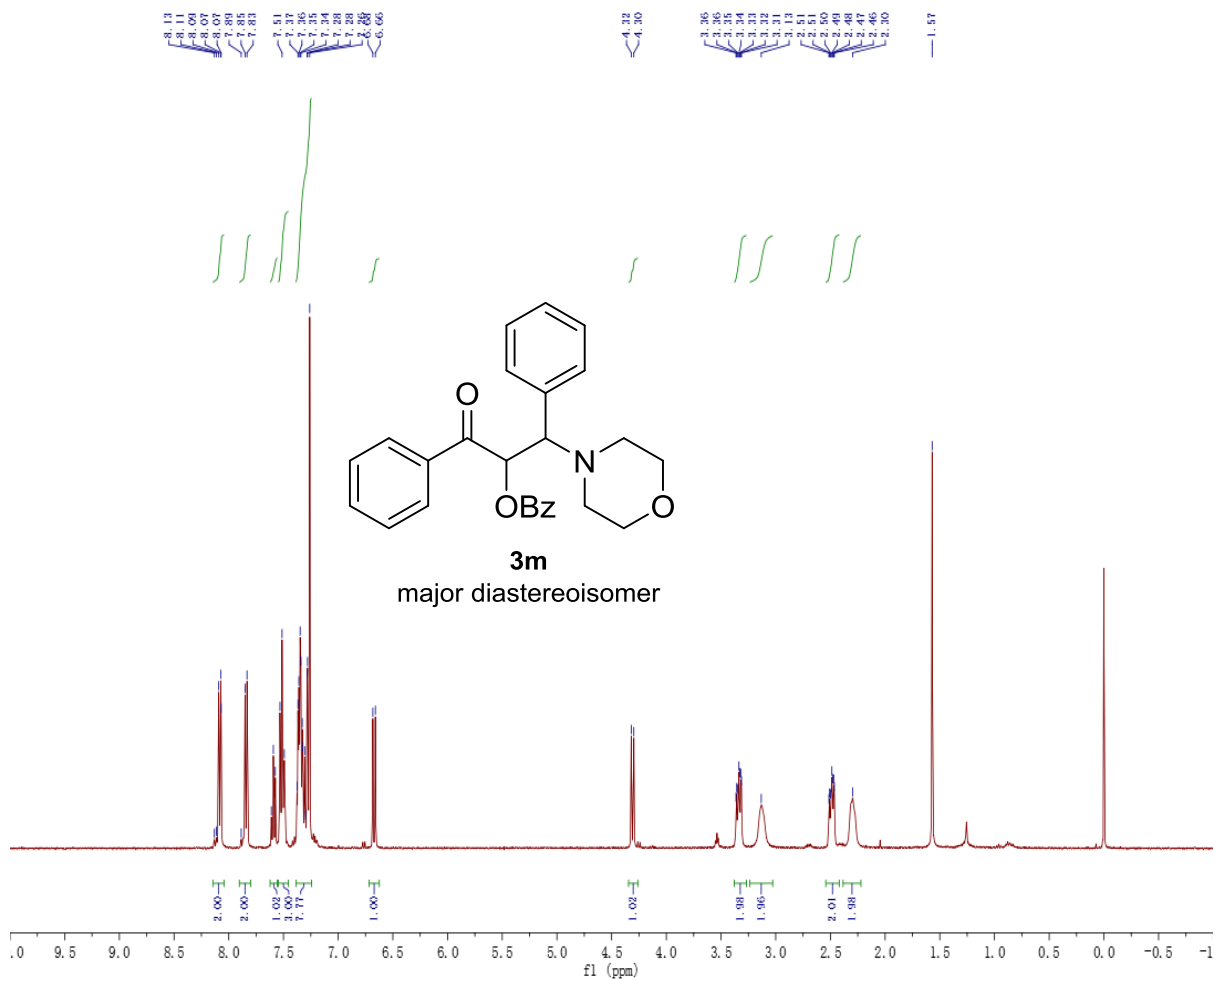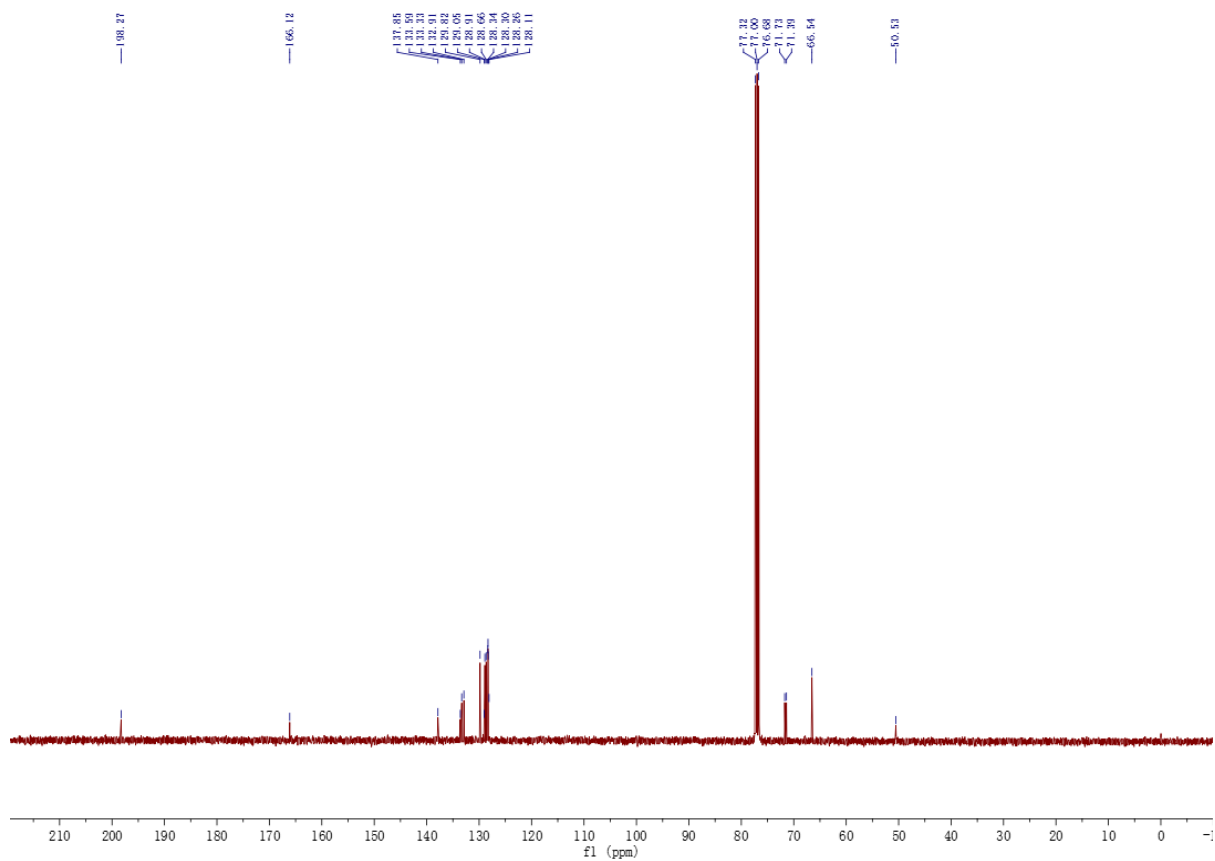

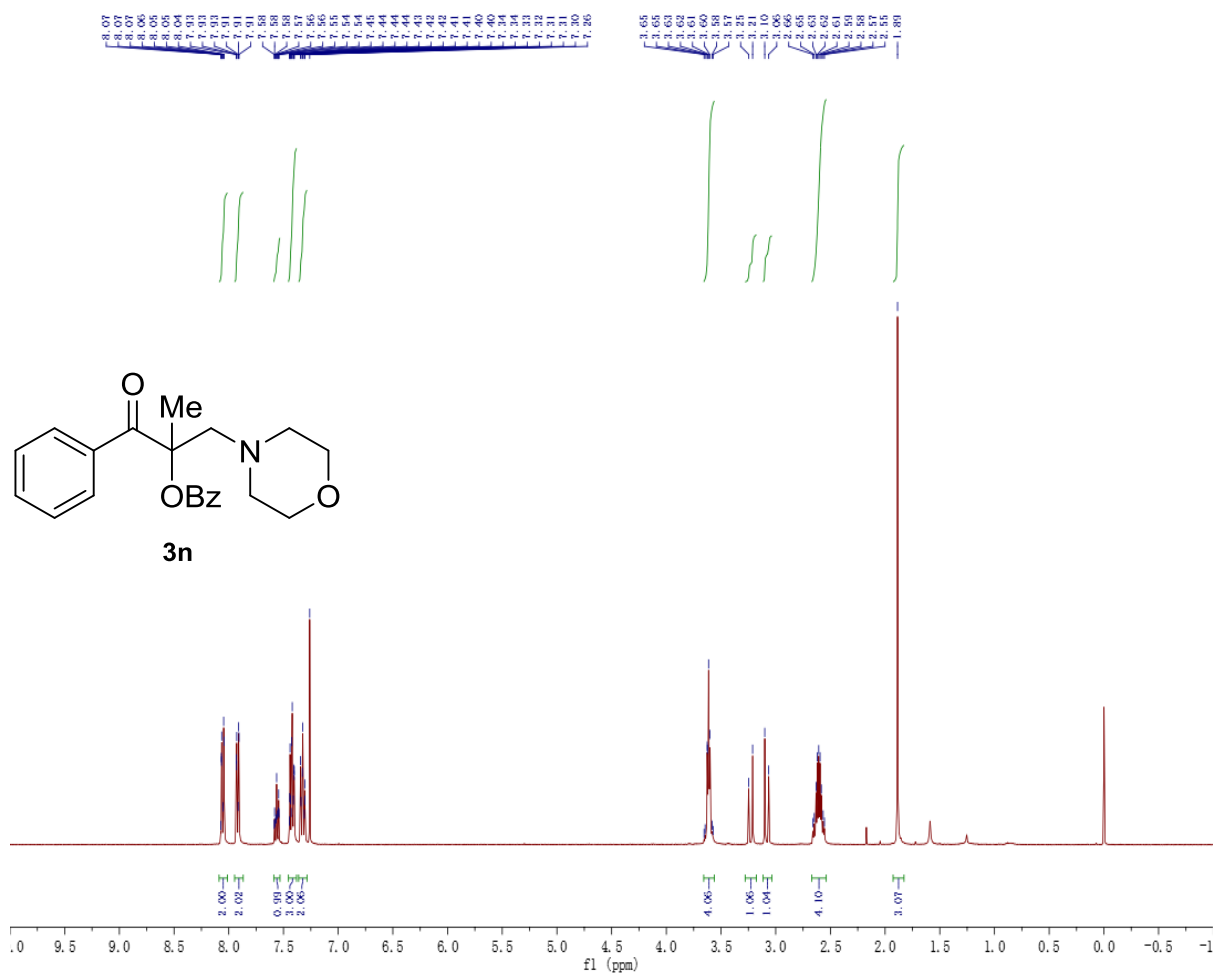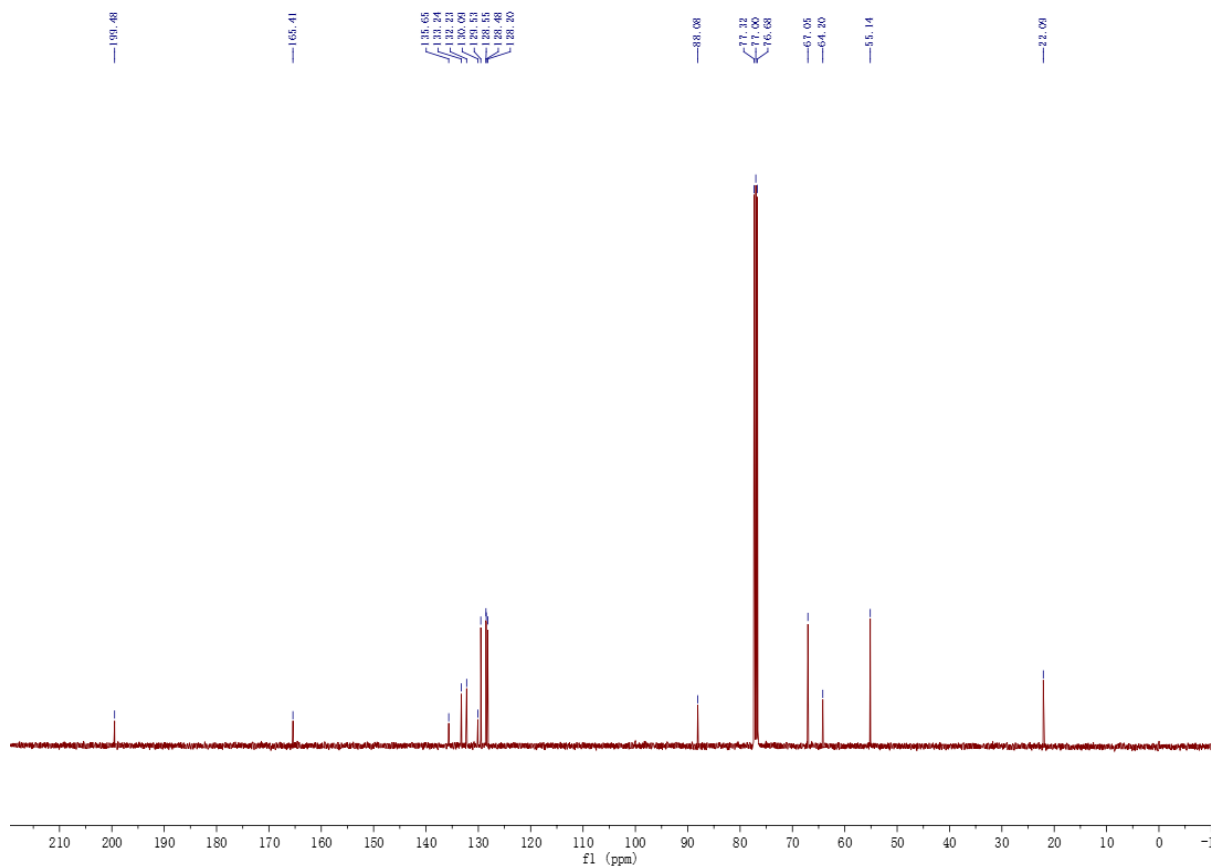

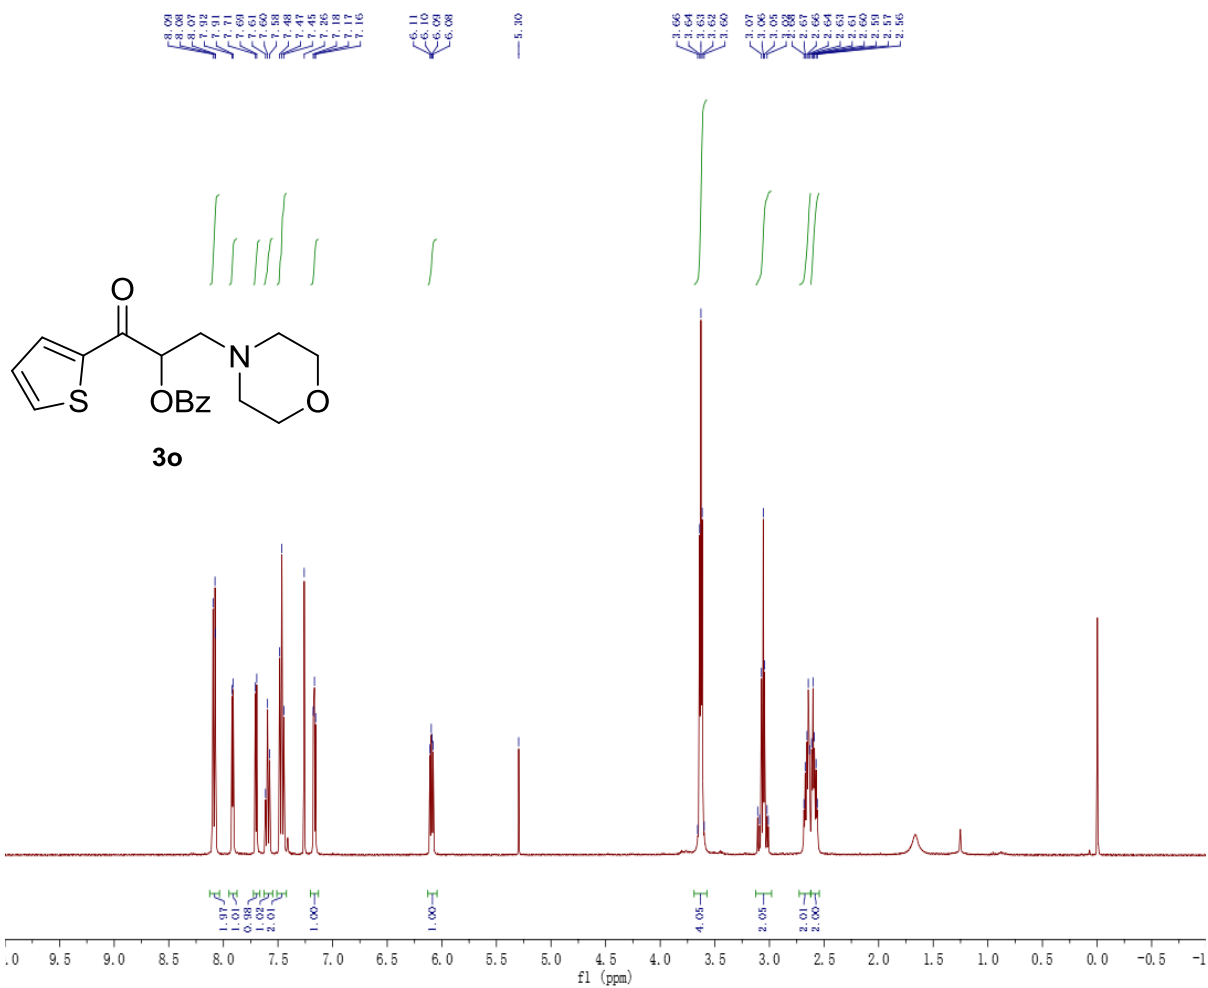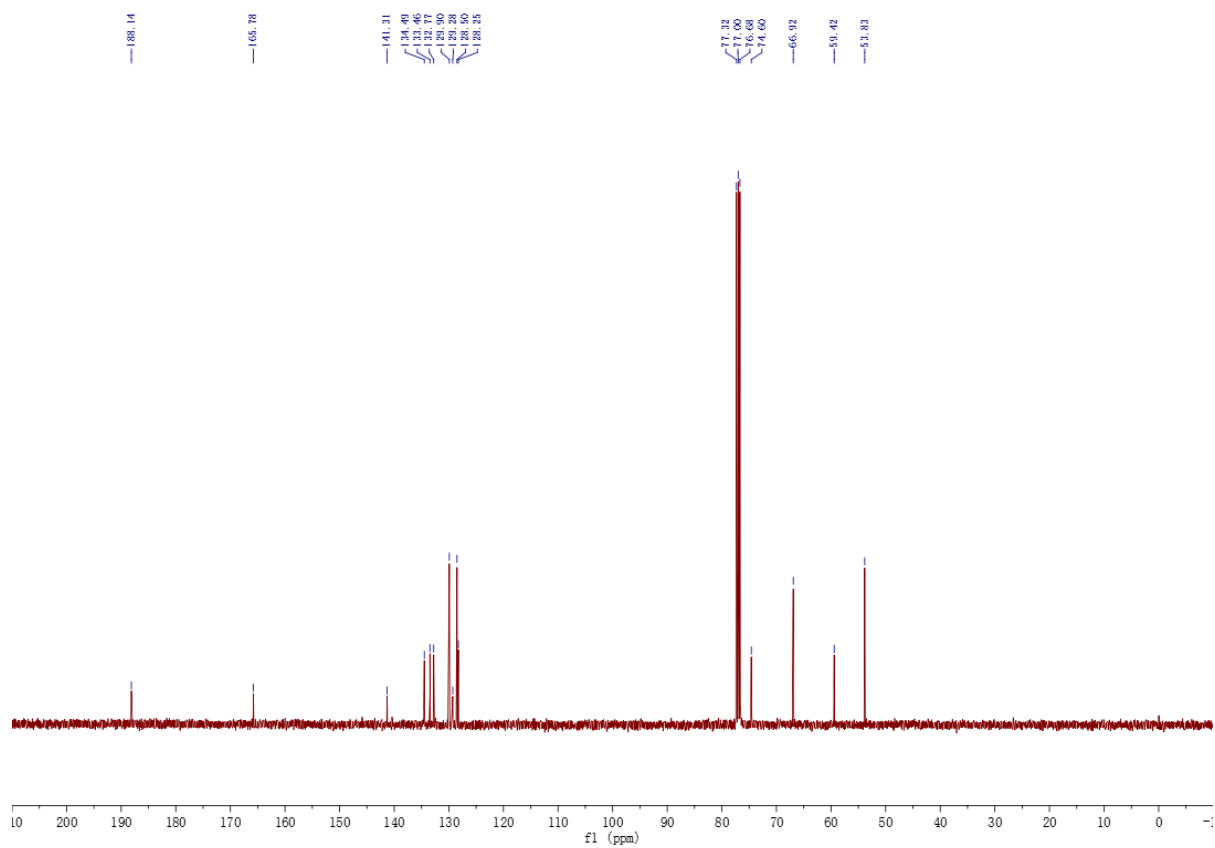

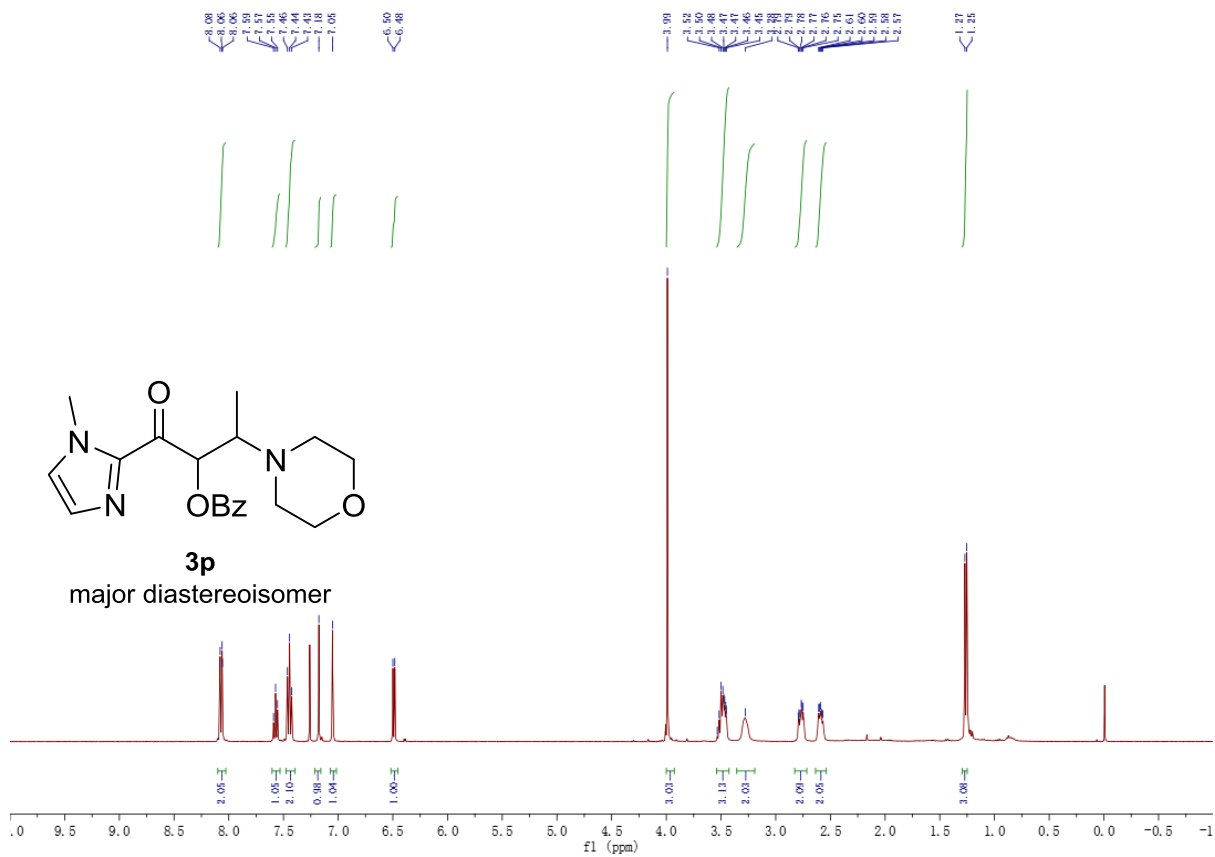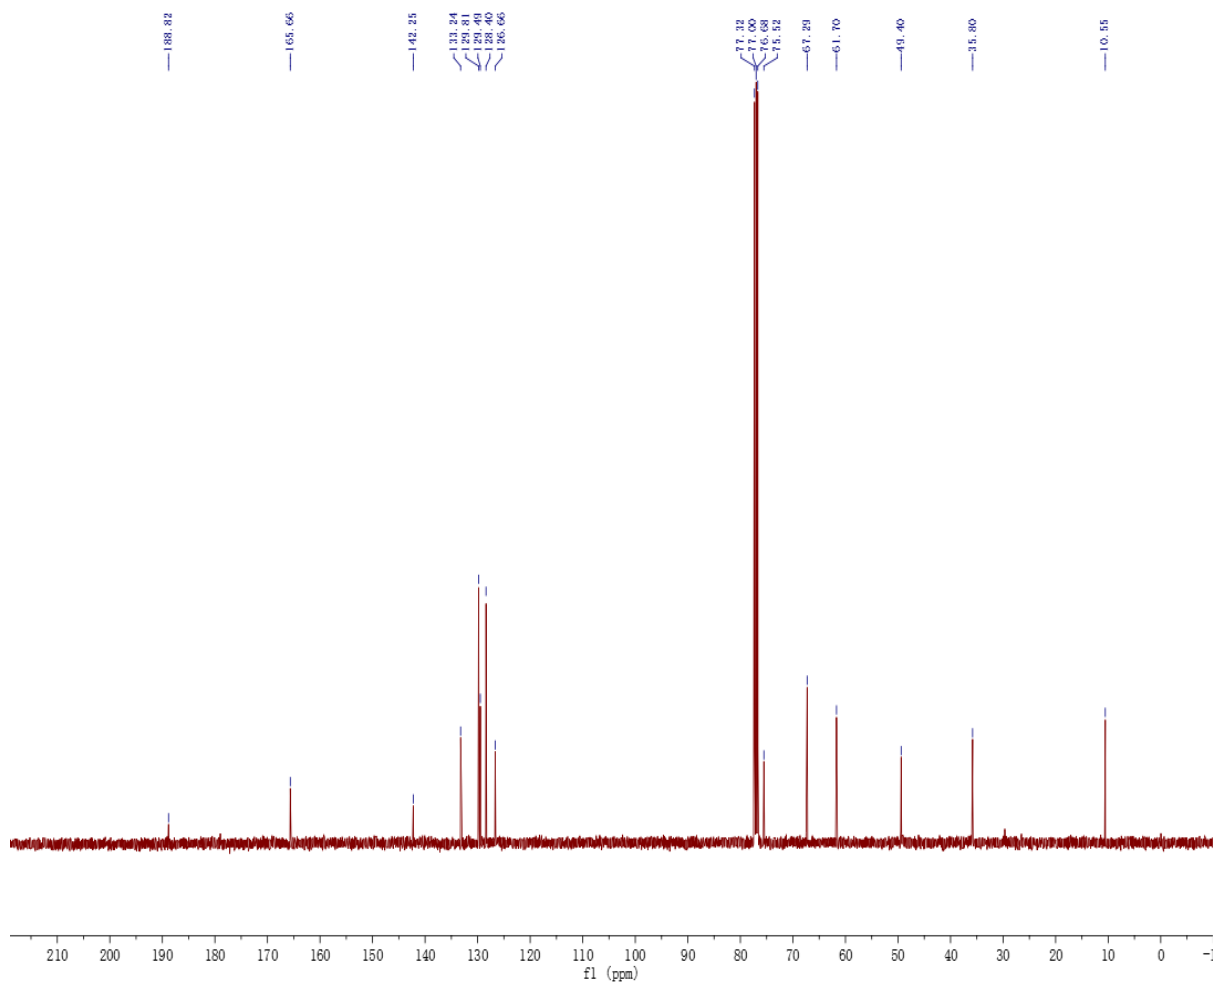

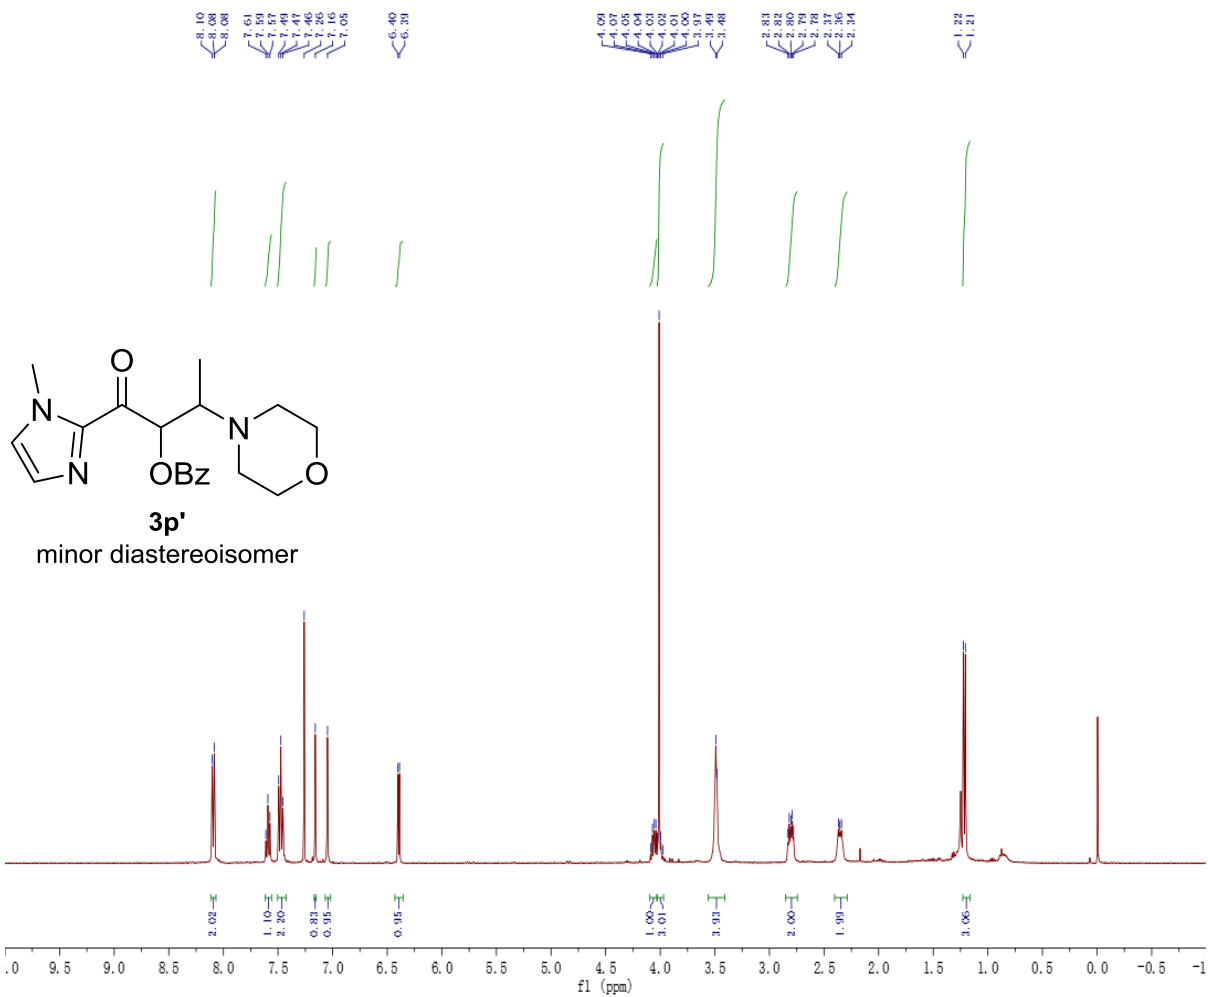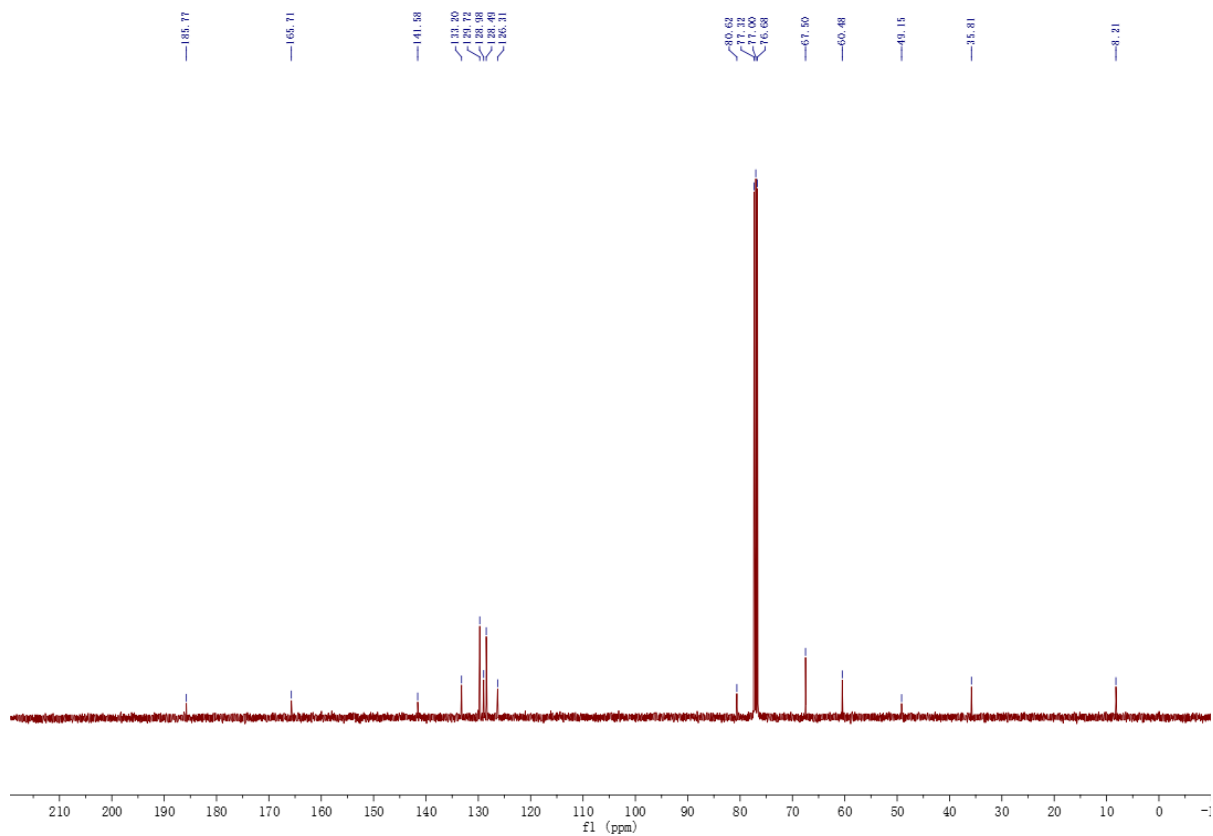

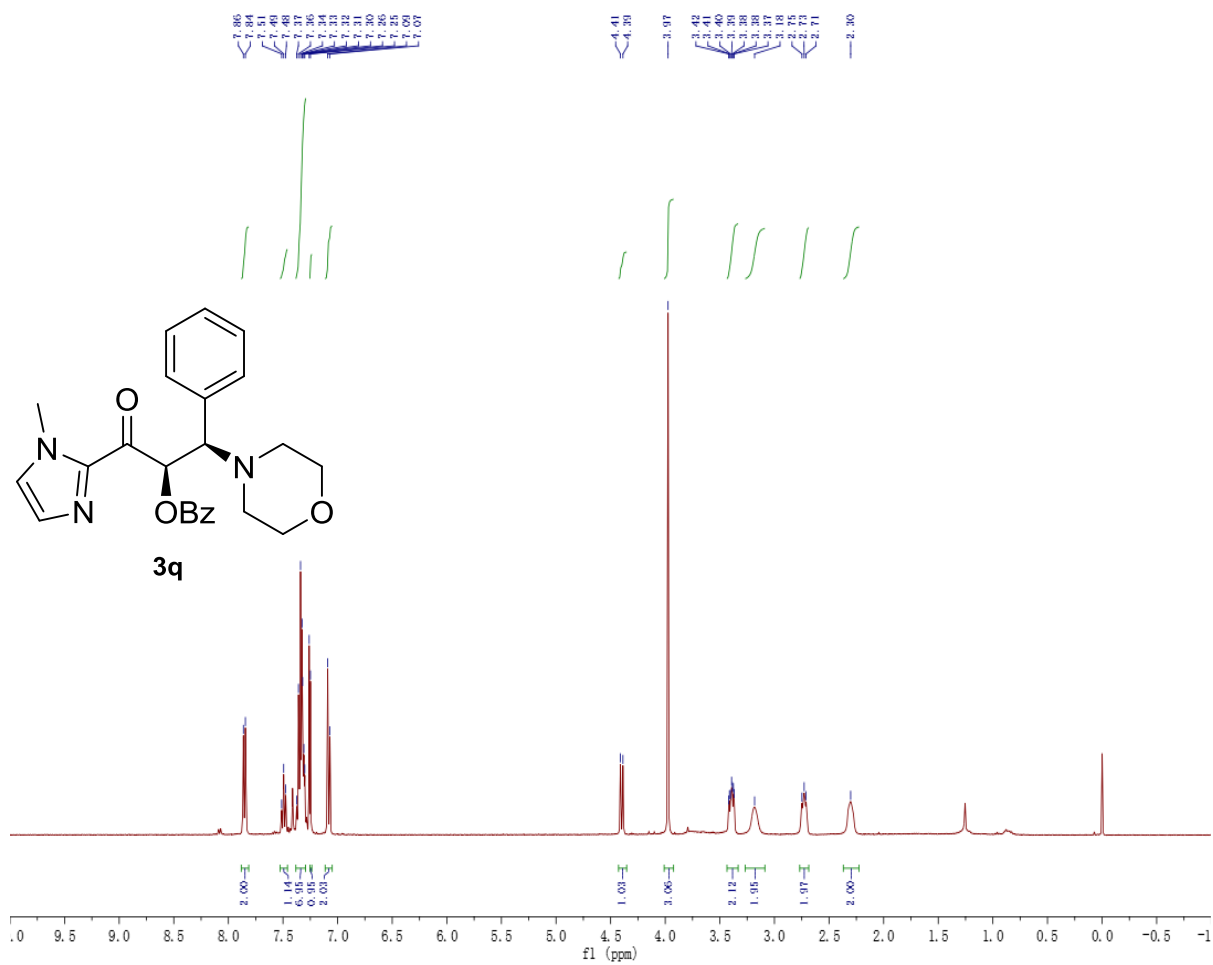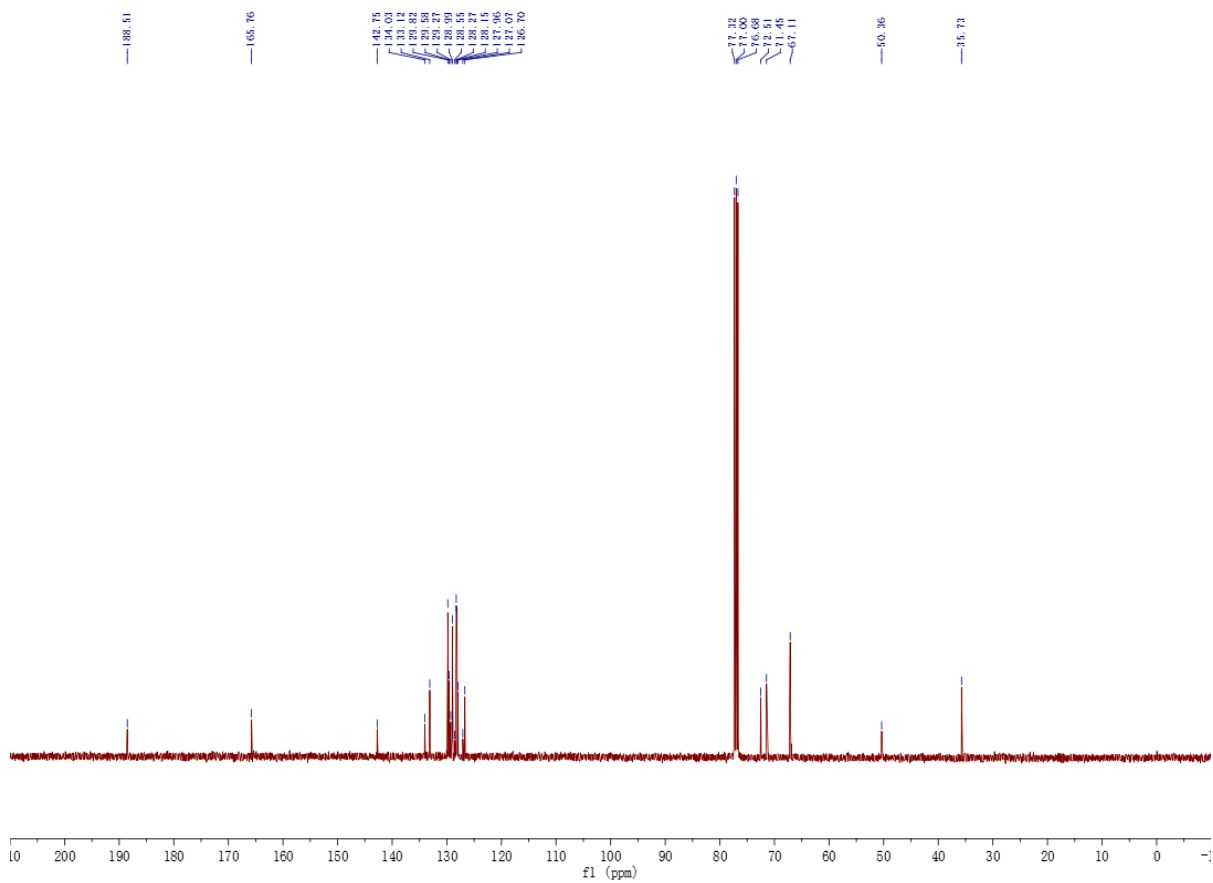



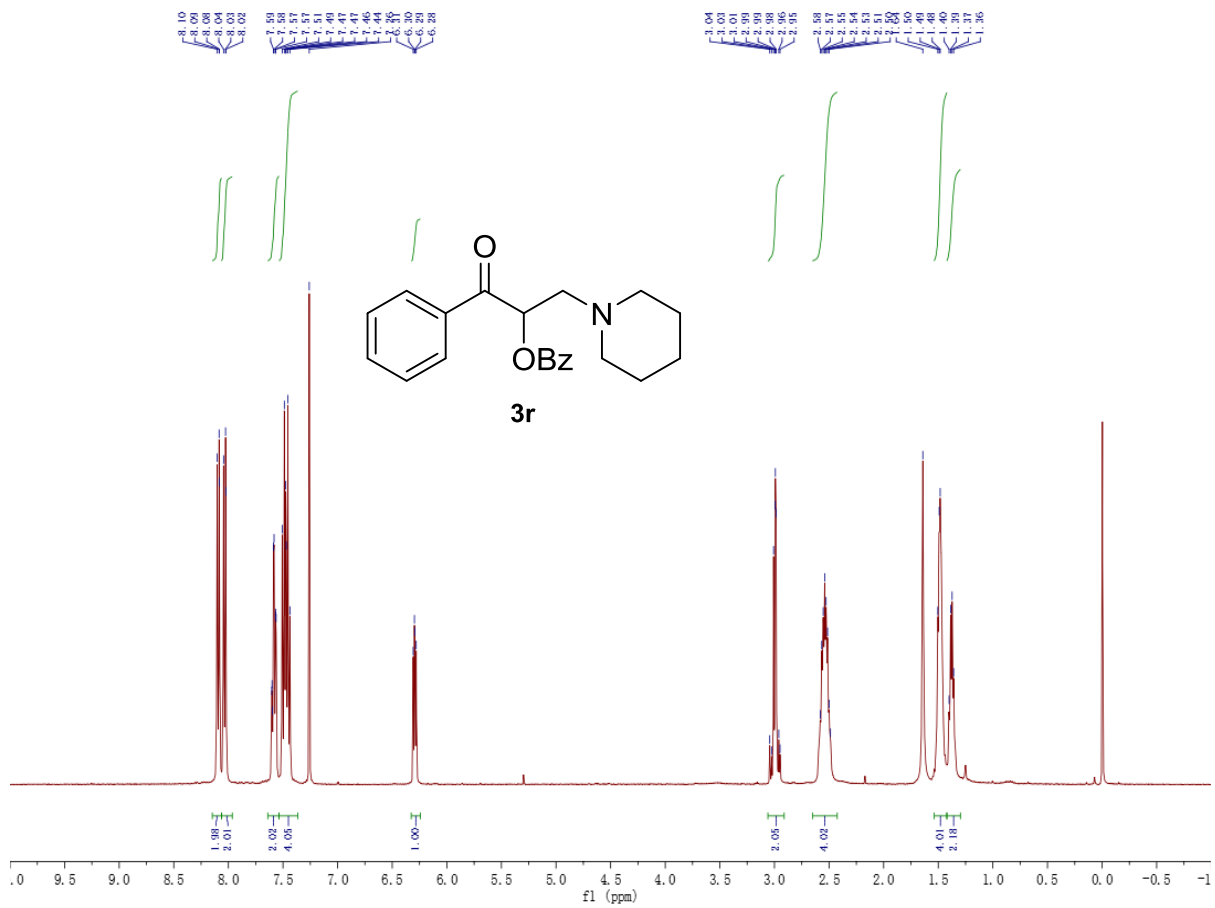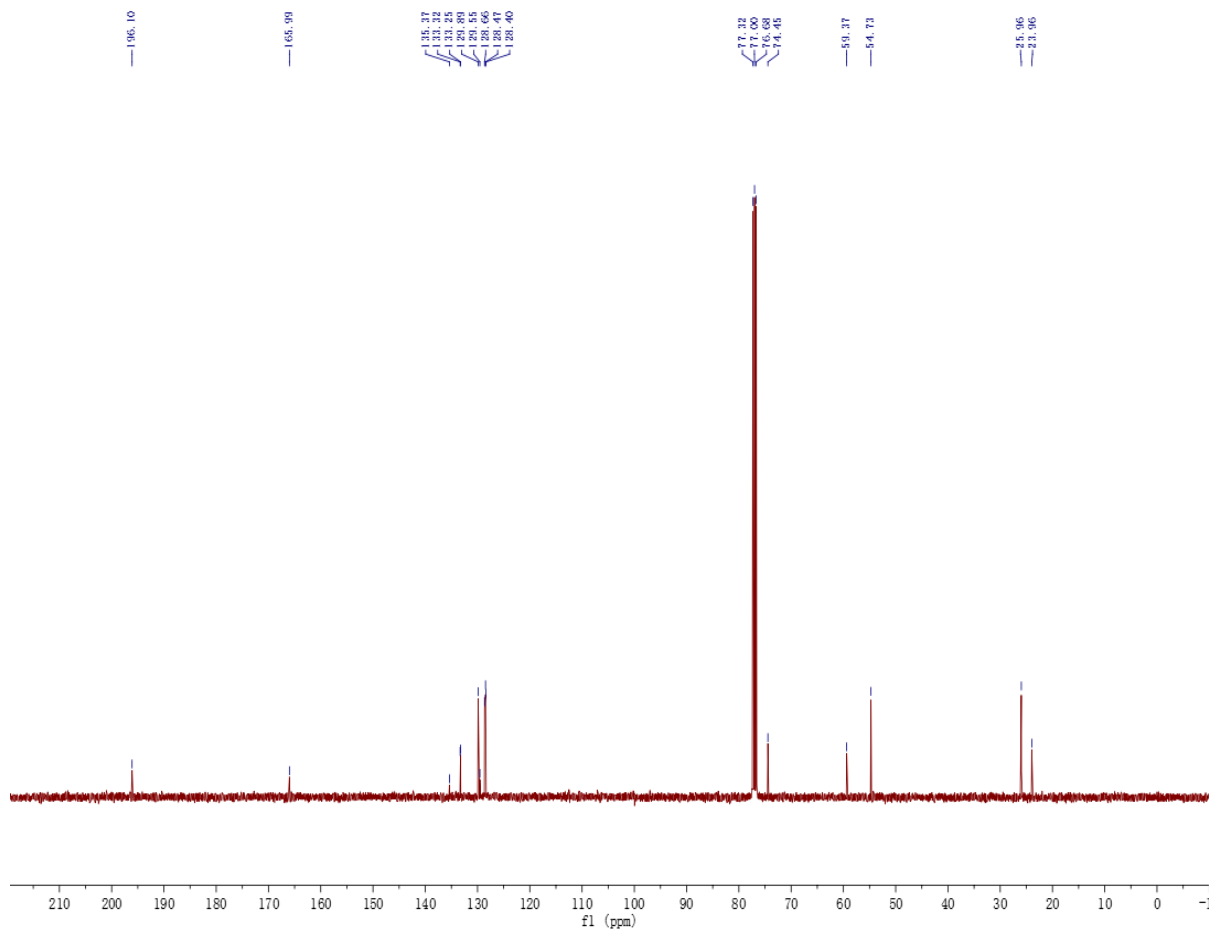

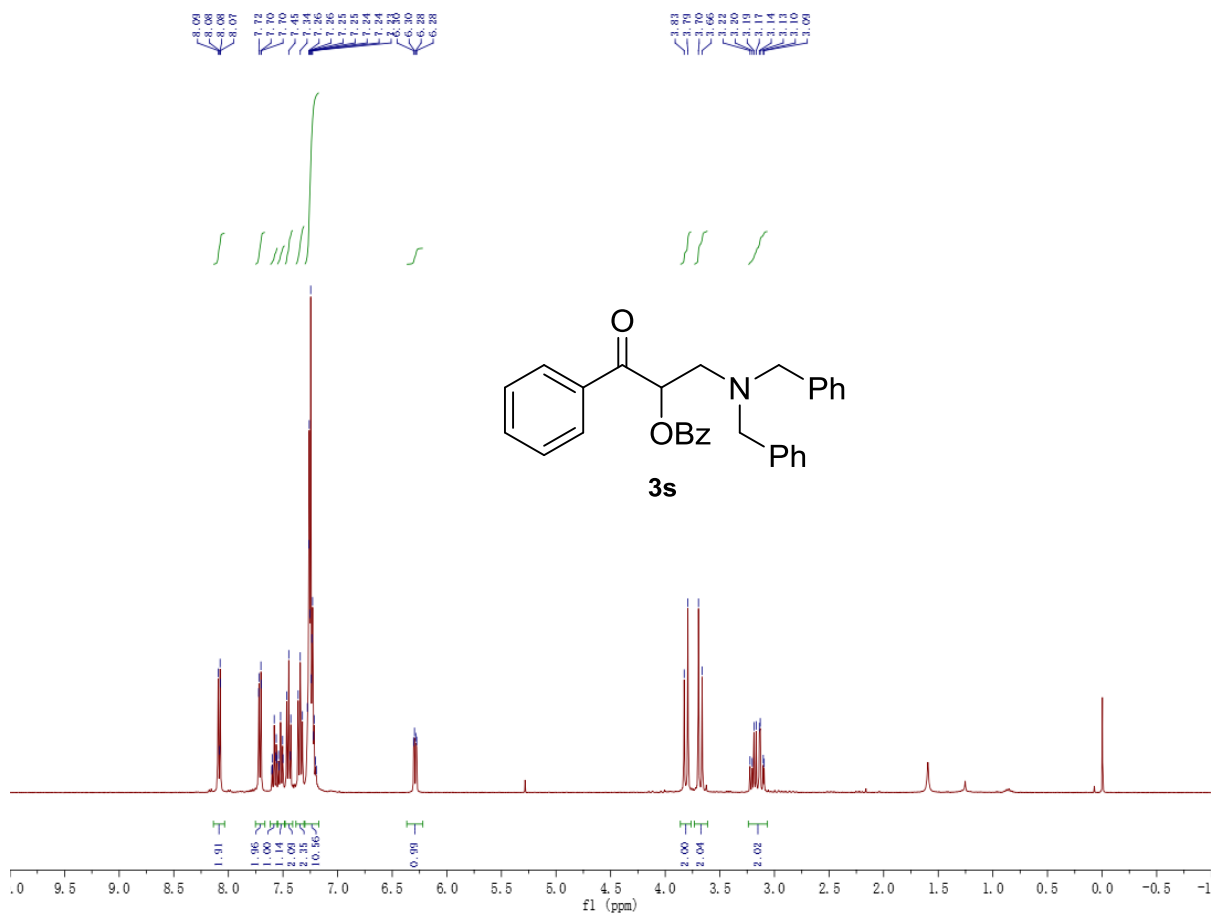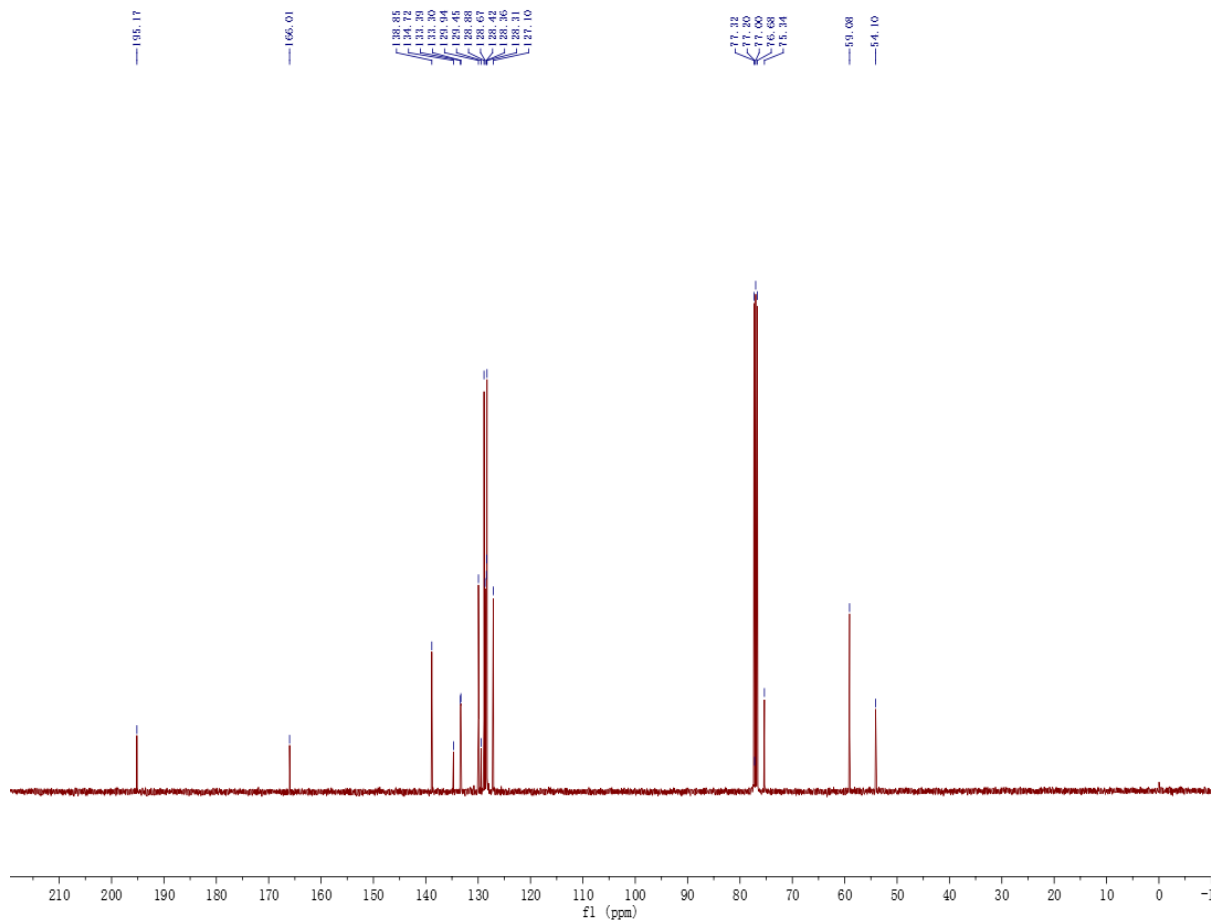

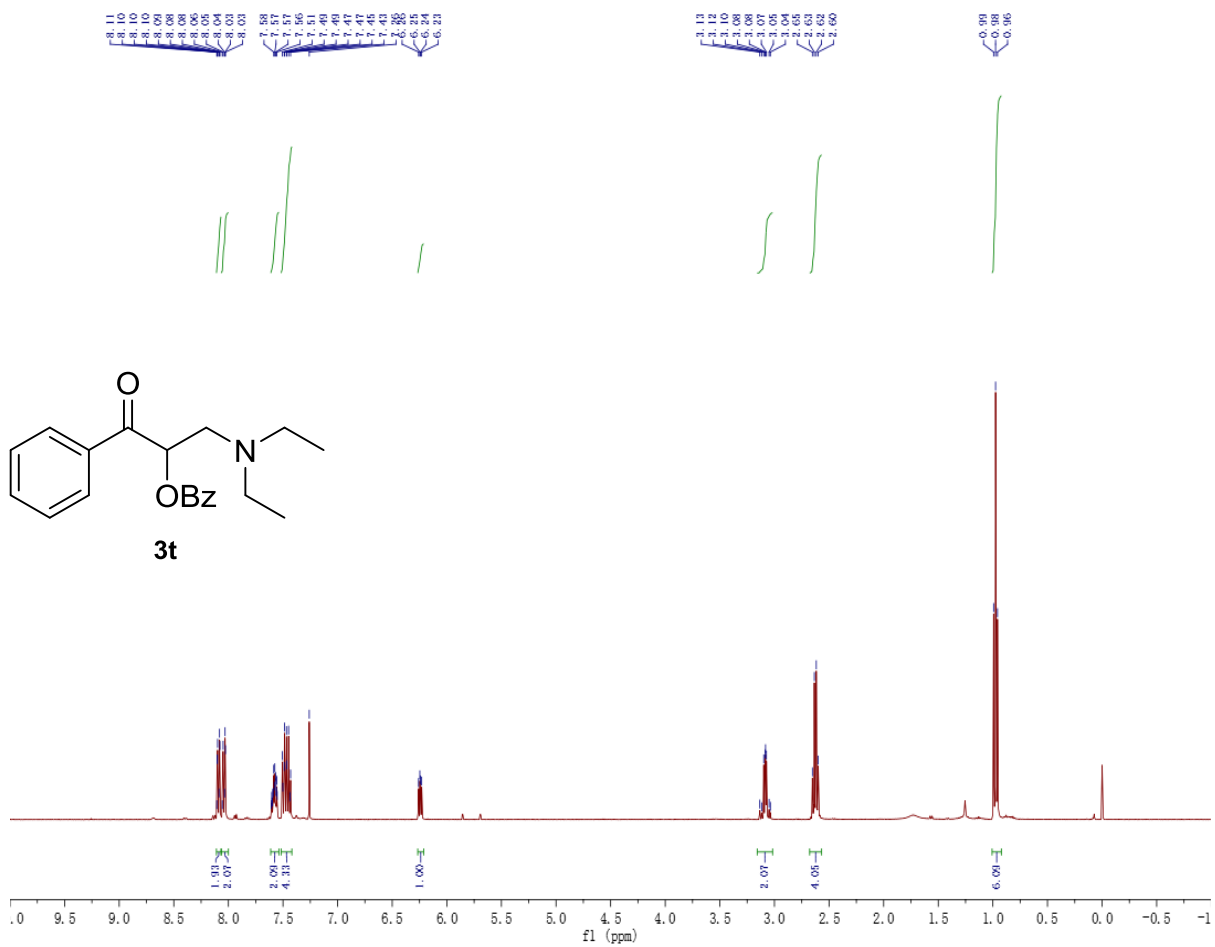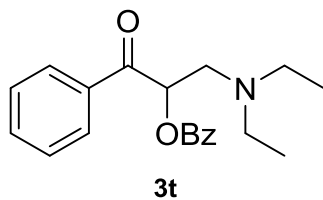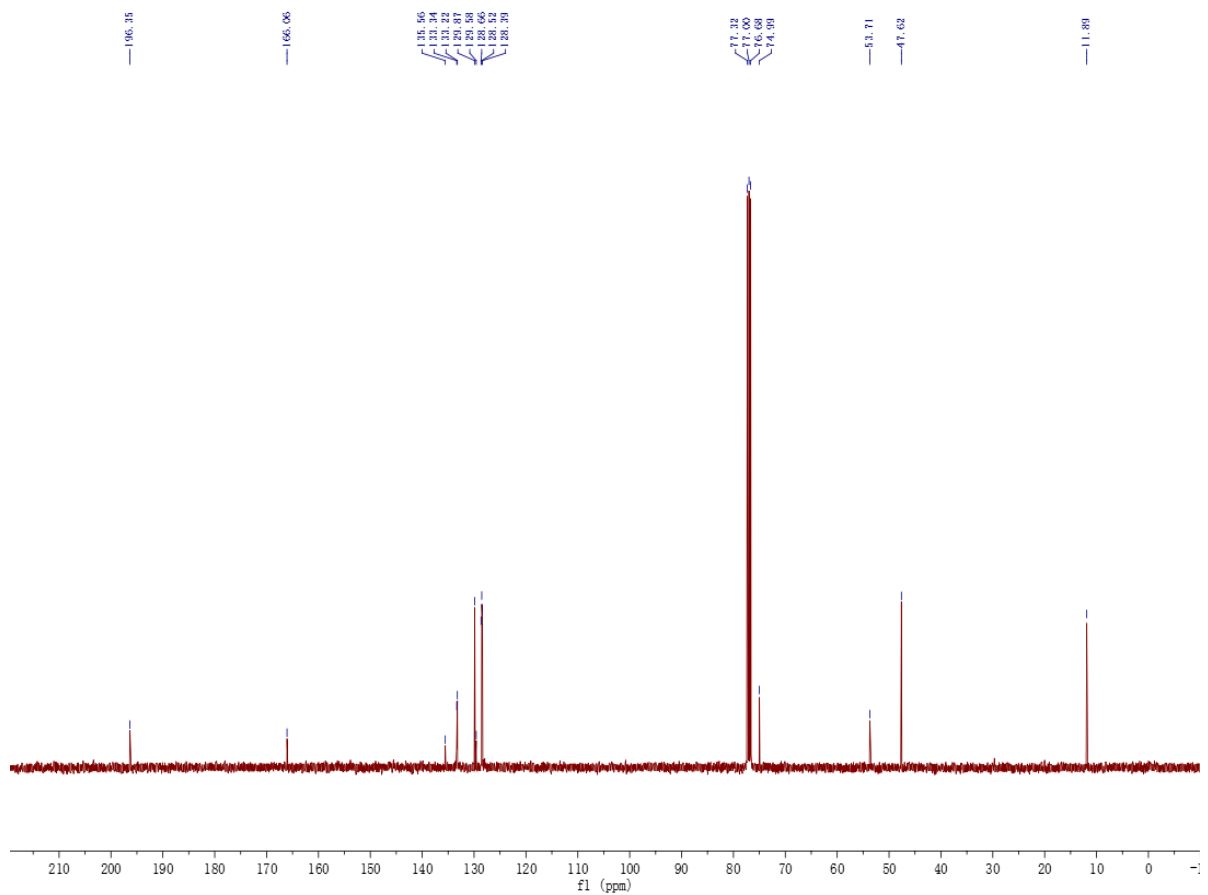

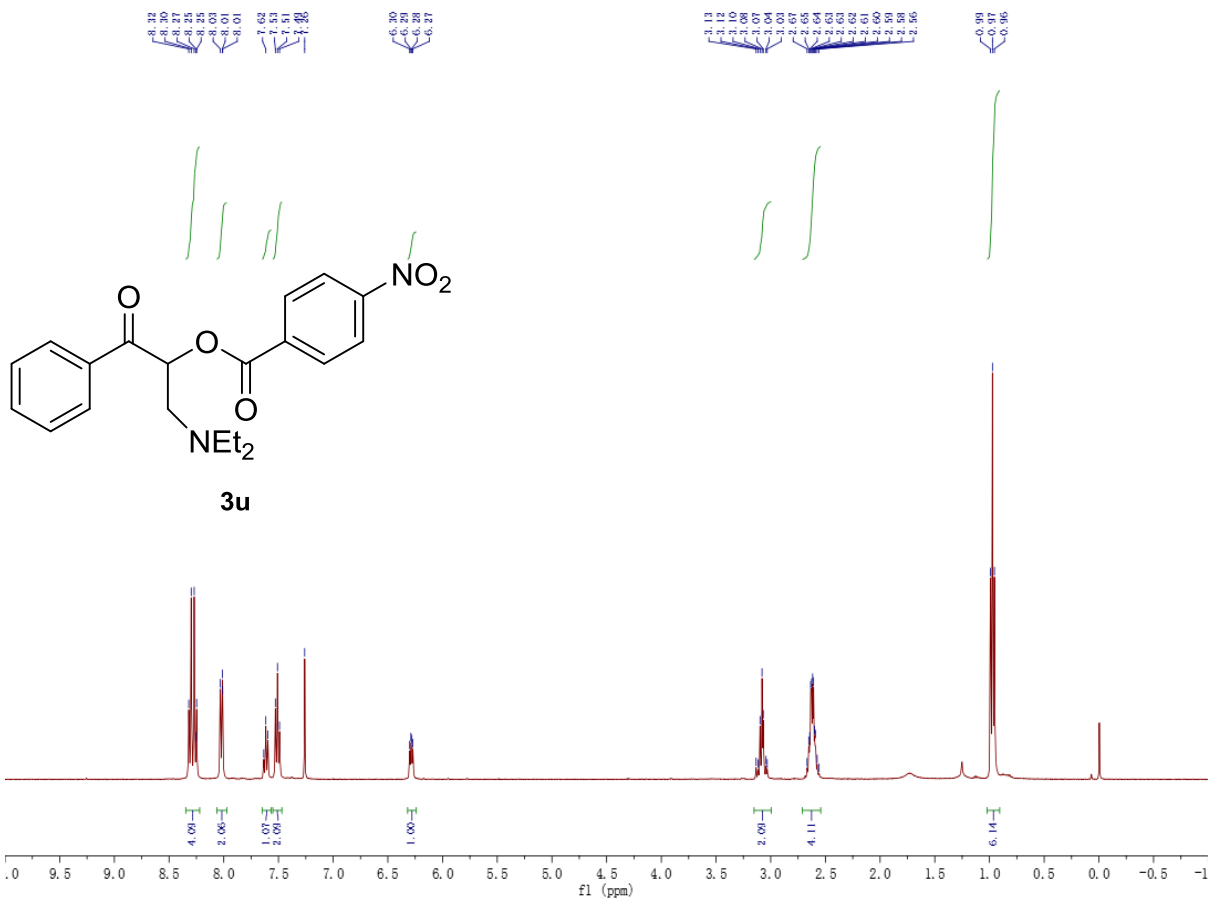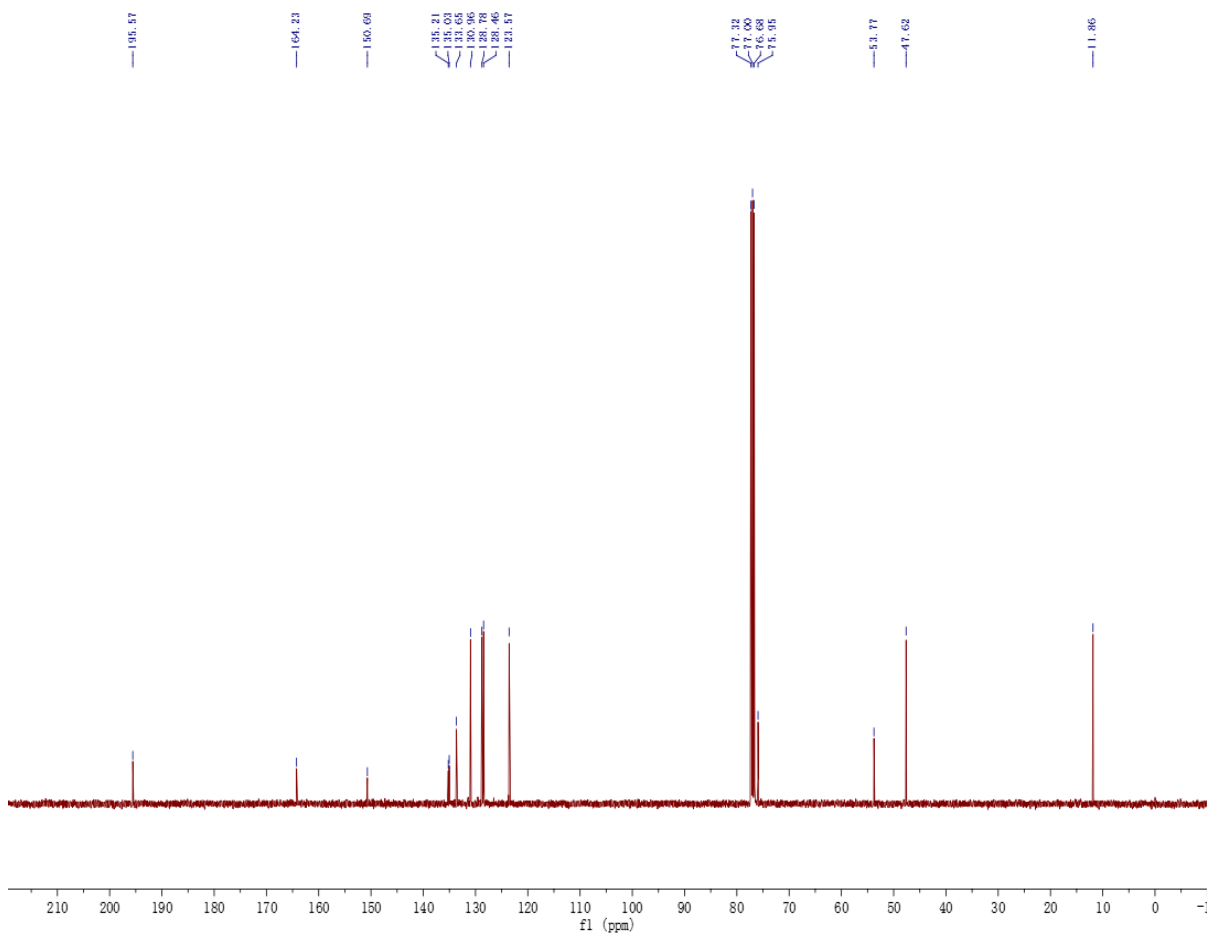

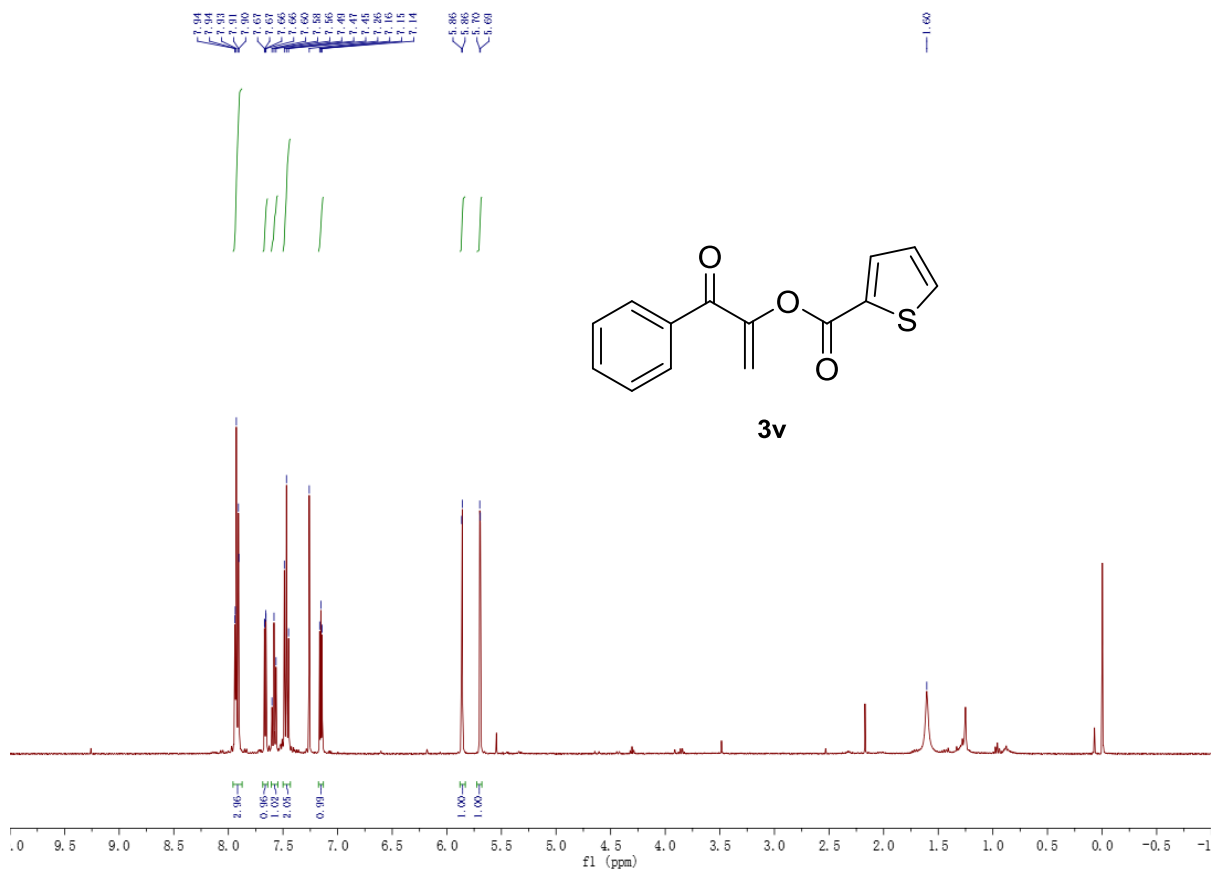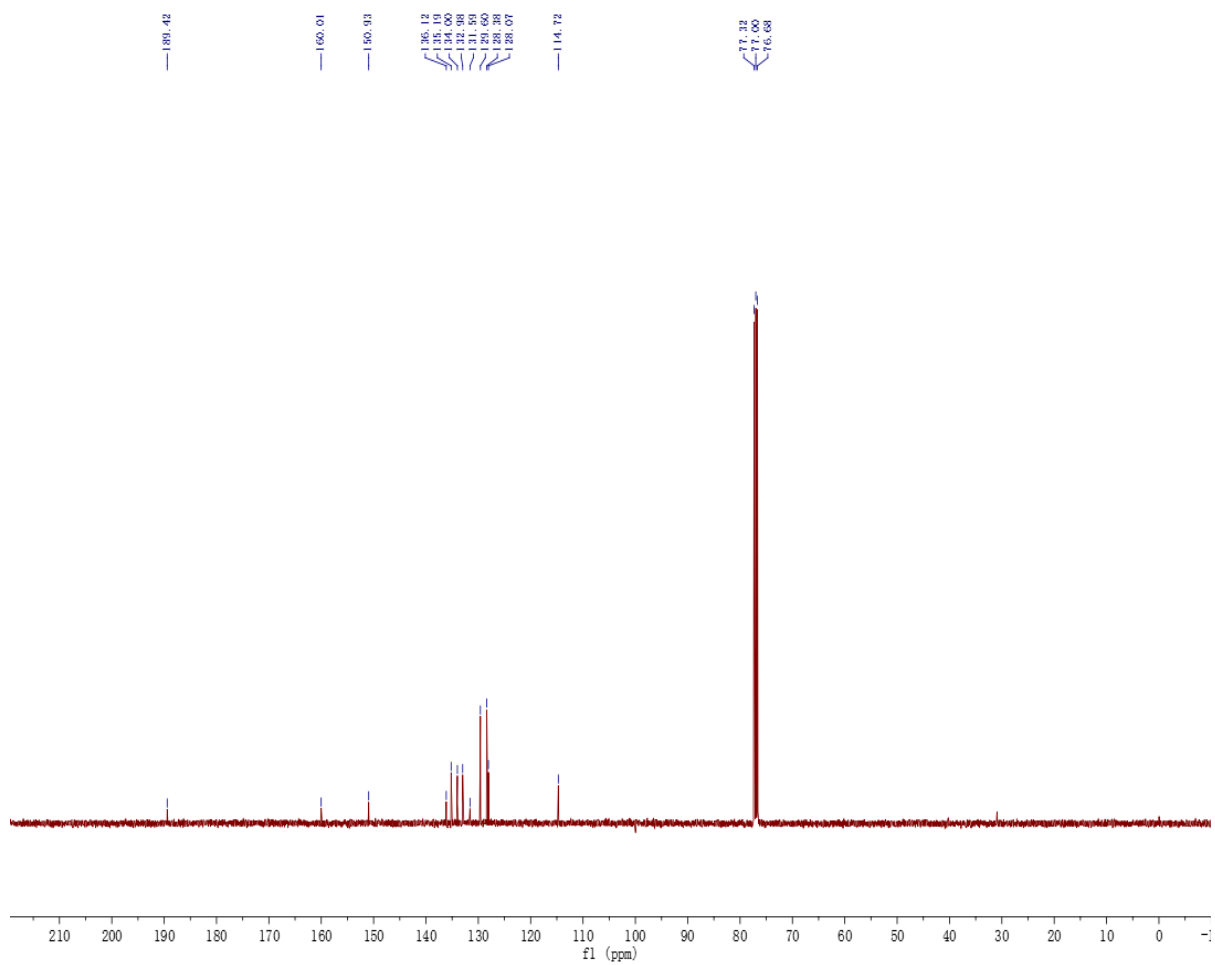

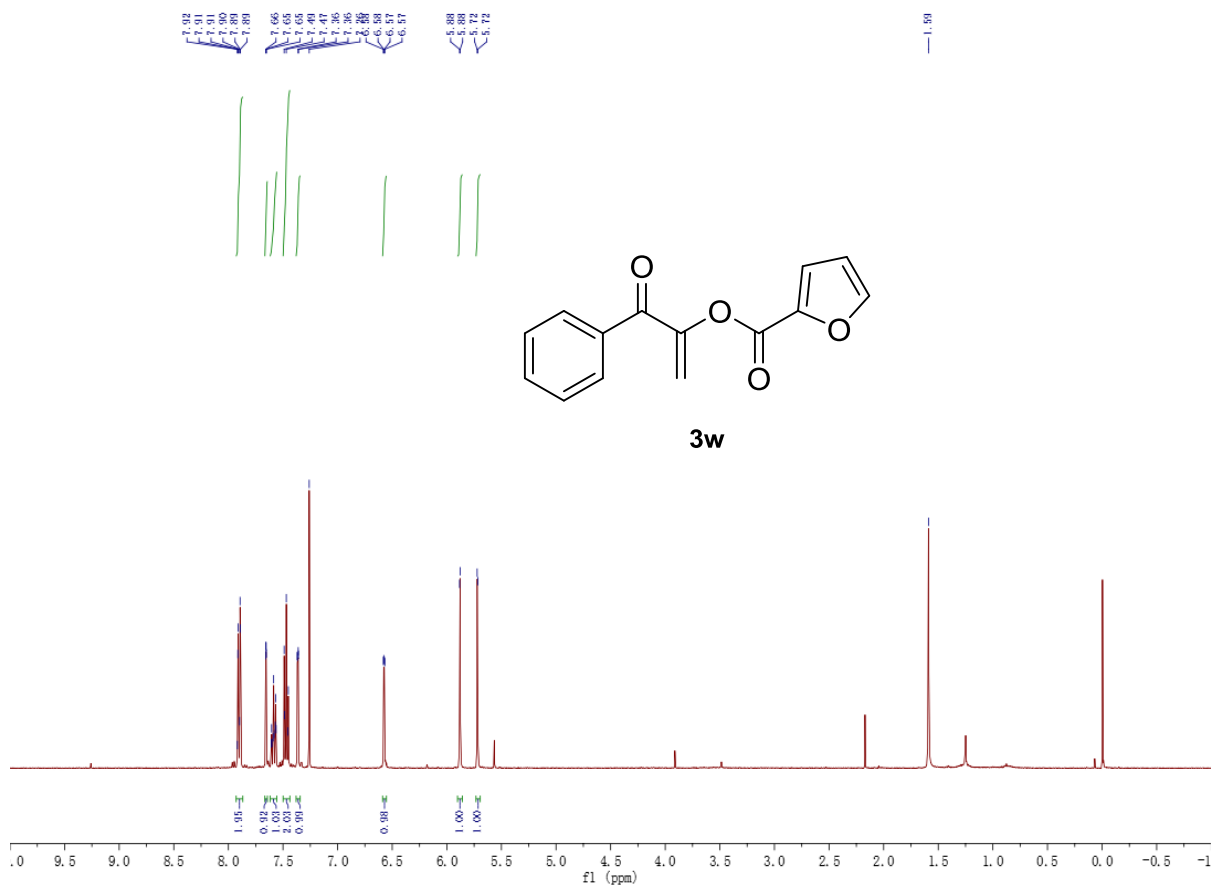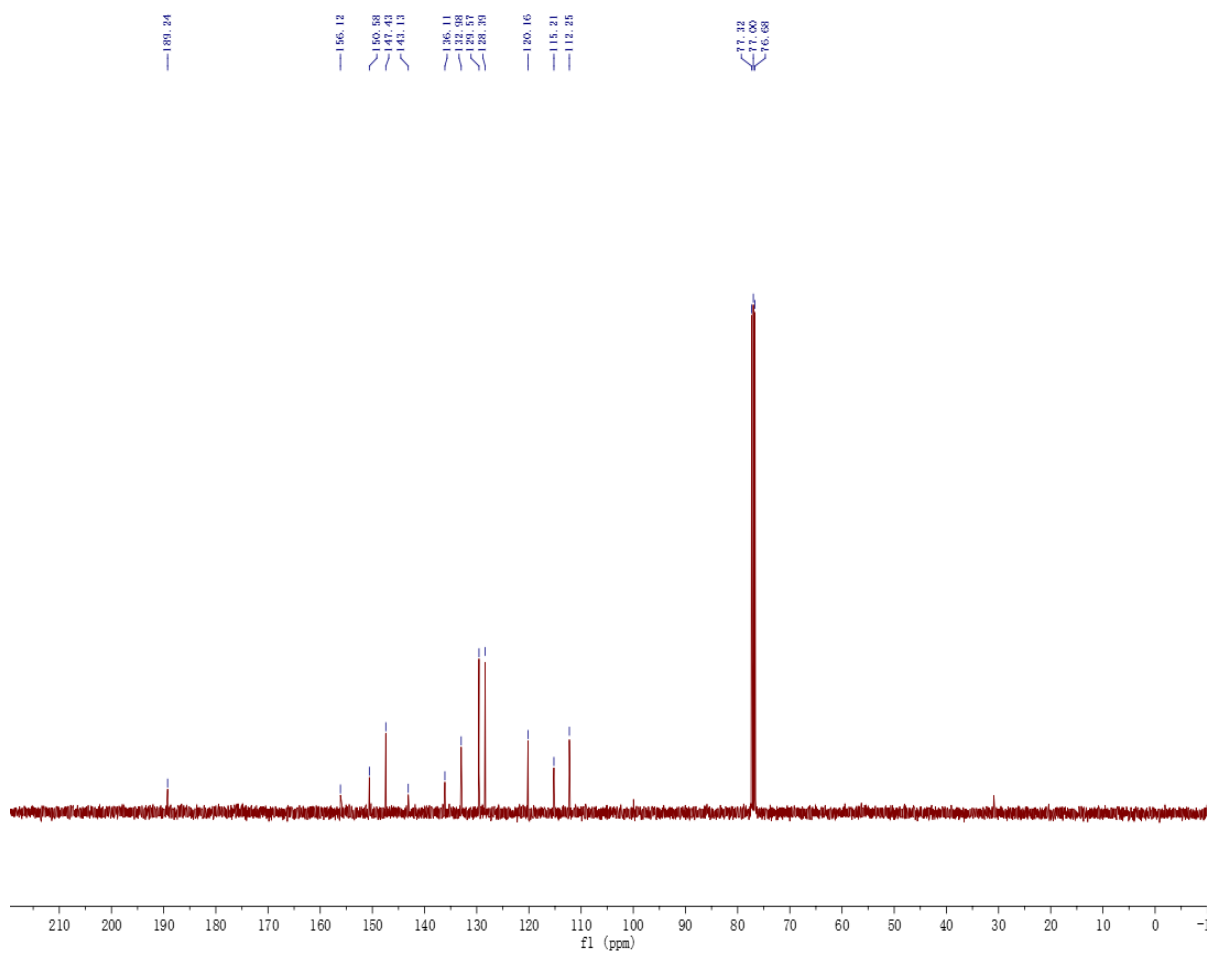

## X-ray Data

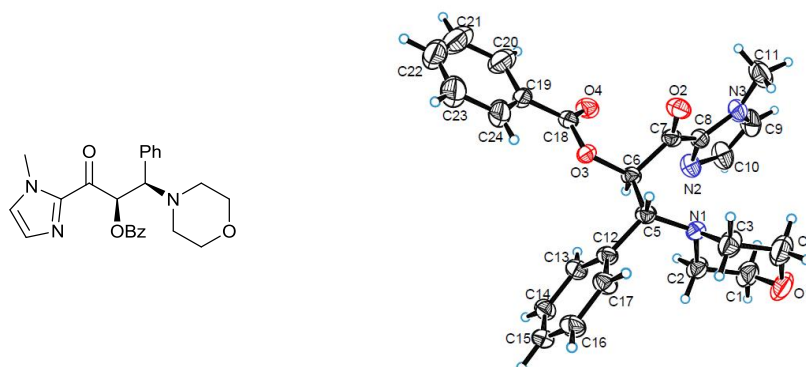

**Table 1 Crystal data and structure refinement for rsc-1.**

|                                               |                                                               |
|-----------------------------------------------|---------------------------------------------------------------|
| Identification code                           | rsc-1                                                         |
| Empirical formula                             | $C_{24}H_{25}N_3O_4$                                          |
| Formula weight                                | 419.47                                                        |
| Temperature/K                                 | 291(2)                                                        |
| Crystal system                                | monoclinic                                                    |
| Space group                                   | $I2/a$                                                        |
| $a/\text{\AA}$                                | 22.3944(3)                                                    |
| $b/\text{\AA}$                                | 10.7588(2)                                                    |
| $c/\text{\AA}$                                | 19.4913(3)                                                    |
| $\alpha/^\circ$                               | 90                                                            |
| $\beta/^\circ$                                | 105.440(2)                                                    |
| $\gamma/^\circ$                               | 90                                                            |
| Volume/ $\text{\AA}^3$                        | 4526.69(13)                                                   |
| Z                                             | 8                                                             |
| $\rho_{\text{calc}}/\text{g/cm}^3$            | 1.231                                                         |
| $\mu/\text{mm}^{-1}$                          | 0.691                                                         |
| F(000)                                        | 1776.0                                                        |
| Crystal size/ $\text{mm}^3$                   | $0.220 \times 0.200 \times 0.150$                             |
| Radiation                                     | $\text{CuK}\alpha$ ( $\lambda = 1.54184$ )                    |
| $2\Theta$ range for data collection/ $^\circ$ | 8.192 to 142.528                                              |
| Index ranges                                  | $-21 \leq h \leq 27, -12 \leq k \leq 12, -23 \leq l \leq 22$  |
| Reflections collected                         | 19485                                                         |
| Independent reflections                       | 4333 [ $R_{\text{int}} = 0.0167, R_{\text{sigma}} = 0.0099$ ] |
| Data/restraints/parameters                    | 4333/34/281                                                   |
| Goodness-of-fit on $F^2$                      | 1.055                                                         |
| Final R indexes [ $I \geq 2\sigma(I)$ ]       | $R_1 = 0.0707, wR_2 = 0.1977$                                 |
| Final R indexes [all data]                    | $R_1 = 0.0787, wR_2 = 0.2049$                                 |
| Largest diff. peak/hole / $e \text{\AA}^{-3}$ | 0.57/-0.32                                                    |

**Table 2 Fractional Atomic Coordinates ( $\times 10^4$ ) and Equivalent Isotropic Displacement Parameters ( $\text{\AA}^2 \times 10^3$ ) for rsc-1.  $U_{\text{eq}}$  is defined as 1/3 of the trace of the orthogonalised  $U_{\text{IJ}}$  tensor.**

| Atom | <i>x</i>   | <i>y</i>   | <i>z</i>   | $U(\text{eq})$ |
|------|------------|------------|------------|----------------|
| O3   | 4382.5(7)  | 7292.5(17) | 4825.8(8)  | 56.5(4)        |
| O2   | 5199.2(9)  | 8610.1(19) | 4230.7(10) | 70.1(5)        |
| N1   | 5890.9(9)  | 8170.0(19) | 5958(1)    | 54.4(5)        |
| O4   | 4444.5(10) | 5912(2)    | 3979.1(10) | 76.1(6)        |
| N3   | 6257.5(11) | 7262(3)    | 4029.8(13) | 73.7(7)        |
| N2   | 6066.5(11) | 5836(2)    | 4767.1(14) | 72.4(6)        |
| O1   | 7133.4(11) | 8519(3)    | 6748.9(15) | 111.4(9)       |
| C12  | 4902.8(11) | 7743(2)    | 6326.7(11) | 52.2(5)        |
| C8   | 5893.9(11) | 6922(3)    | 4457.9(13) | 57.7(6)        |
| C7   | 5376.5(11) | 7658(2)    | 4558.6(11) | 53.4(5)        |
| C6   | 5050.4(10) | 7186(2)    | 5107.7(11) | 52.1(5)        |
| C5   | 5207.8(11) | 8074(2)    | 5737.2(11) | 52.4(5)        |
| C13  | 4751.0(12) | 6543(2)    | 6462.5(13) | 60.4(6)        |
| C18  | 4140.4(12) | 6565(3)    | 4250.9(13) | 61.2(6)        |
| C14  | 4520.1(12) | 6279(3)    | 7041.1(14) | 64.9(7)        |
| C17  | 4803.5(13) | 8682(3)    | 6767.6(13) | 65.5(7)        |
| C15  | 4445.8(13) | 7210(3)    | 7488.5(13) | 68.4(7)        |
| C16  | 4585.1(15) | 8412(3)    | 7352.3(15) | 75.6(8)        |
| C2   | 6218.1(12) | 7215(3)    | 6436.6(16) | 70.6(7)        |
| C19  | 3460.3(14) | 6726(3)    | 3991.5(16) | 80.8(10)       |
| C3   | 6123.5(15) | 9393(3)    | 6218(2)    | 84.9(9)        |
| C1   | 6900.5(14) | 7328(4)    | 6515(2)    | 94.5(11)       |
| C9   | 6675.8(15) | 6320(4)    | 4088(2)    | 95.6(11)       |
| C10  | 6557.9(15) | 5474(4)    | 4539(2)    | 93.7(11)       |
| C11  | 6224.5(19) | 8391(4)    | 3600(2)    | 110.5(14)      |
| C24  | 3141.5(17) | 7457(5)    | 4333(2)    | 105.9(12)      |
| C22  | 2220(2)    | 6920(6)    | 3476(3)    | 136.2(16)      |
| C4   | 6804.2(18) | 9434(4)    | 6287(3)    | 119.6(15)      |
| C20  | 3149(2)    | 6086(4)    | 3380(2)    | 118.0(14)      |
| C23  | 2502(2)    | 7592(5)    | 4083(3)    | 130.6(14)      |
| C21  | 2506(3)    | 6186(6)    | 3131(3)    | 150.4(19)      |



**Table 3 Anisotropic Displacement Parameters ( $\text{\AA}^2 \times 10^3$ ) for rsc-1. The Anisotropic displacement factor exponent takes the form: -  $2\pi^2[h^2a^2U_{11}+2hka*b*U_{12}+\dots]$ .**

| Atom | $U_{11}$ | $U_{22}$ | $U_{33}$  | $U_{23}$  | $U_{13}$  | $U_{12}$  |
|------|----------|----------|-----------|-----------|-----------|-----------|
| O3   | 45.4(8)  | 77.5(11) | 44.9(8)   | -4.0(7)   | 9.0(6)    | -0.3(7)   |
| O2   | 75.3(12) | 80.3(13) | 59.2(10)  | 14.6(9)   | 25.8(9)   | 12.9(9)   |
| N1   | 48.8(10) | 64.2(12) | 47.7(10)  | -0.4(8)   | 8.7(8)    | -0.7(9)   |
| O4   | 91.8(14) | 83.9(13) | 54.8(10)  | -13.1(9)  | 23.1(10)  | -13.0(11) |
| N3   | 62.2(13) | 92.9(17) | 75.5(14)  | -2.8(13)  | 34.8(11)  | -4.5(12)  |
| N2   | 67.7(14) | 71.9(15) | 86.3(16)  | -2.3(12)  | 35.8(12)  | 10.2(11)  |
| O1   | 67.1(14) | 126(2)   | 115.0(19) | 13.9(16)  | -21.6(13) | -26.1(14) |
| C12  | 54.9(12) | 59.5(14) | 43.1(11)  | -1.8(9)   | 15.0(9)   | 6.2(10)   |
| C8   | 50.5(12) | 74.9(16) | 50.9(12)  | -7.1(11)  | 19(1)     | -1.3(11)  |
| C7   | 54.3(13) | 64.8(15) | 41.4(11)  | -1.4(10)  | 13.4(9)   | 3.3(10)   |
| C6   | 49.7(12) | 62.7(14) | 44.3(11)  | 0.1(10)   | 13.6(9)   | 7.3(10)   |
| C5   | 53.9(13) | 58.5(13) | 44.7(11)  | -1.7(10)  | 13.2(9)   | 4.8(10)   |
| C13  | 67.4(15) | 61.0(15) | 57.2(13)  | -1.7(11)  | 24.4(11)  | 5.2(11)   |
| C18  | 65.9(15) | 71.6(16) | 45.0(12)  | 7.3(11)   | 12.8(11)  | -13.6(12) |
| C14  | 63.1(15) | 73.0(17) | 60.9(14)  | 12.7(13)  | 20.8(12)  | 3.2(12)   |
| C17  | 81.6(17) | 64.7(15) | 57.0(13)  | -9.3(12)  | 30.2(12)  | -2.4(13)  |
| C15  | 64.2(15) | 99(2)    | 44.1(12)  | 0.2(13)   | 18.7(11)  | -5.5(14)  |
| C16  | 90(2)    | 89(2)    | 56.6(14)  | -18.4(14) | 33.3(14)  | -6.2(16)  |
| C2   | 55.9(15) | 78.2(18) | 70.6(16)  | 4.8(14)   | 4.3(12)   | 4.4(12)   |
| C19  | 59.1(16) | 105(2)   | 67.4(16)  | 36.1(16)  | -2.8(13)  | -25.3(16) |
| C3   | 75.0(19) | 72.7(19) | 96(2)     | -0.6(16)  | 4.1(16)   | -12.4(15) |
| C1   | 55.0(16) | 113(3)   | 105(3)    | 12(2)     | 2.9(16)   | 4.3(17)   |
| C9   | 67.8(18) | 115(3)   | 122(3)    | -12(2)    | 56.3(19)  | 8.9(18)   |
| C10  | 78(2)    | 89(2)    | 130(3)    | 2(2)      | 56(2)     | 18.7(17)  |
| C11  | 93(2)    | 142(4)   | 116(3)    | 32(3)     | 61(2)     | 3(2)      |
| C24  | 66.1(16) | 139(3)   | 111(2)    | 37(2)     | 20.7(18)  | -2.3(19)  |
| C22  | 80(2)    | 159(3)   | 147(3)    | 58(3)     | -8(2)     | -32(2)    |
| C4   | 87(3)    | 115(3)   | 134(3)    | 22(3)     | -10(2)    | -38(2)    |
| C20  | 107(3)   | 120(3)   | 100(2)    | 22(2)     | -19(2)    | -27(2)    |
| C23  | 75.5(17) | 169(3)   | 145(3)    | 45(2)     | 25(2)     | 1(2)      |
| C21  | 130(3)   | 150(4)   | 129(3)    | 22(3)     | -39(2)    | -38(3)    |

**Table 4 Bond Lengths for rsc-1.**

| Atom | Atom | Length/Å | Atom | Atom | Length/Å |
|------|------|----------|------|------|----------|
| O3   | C18  | 1.356(3) | C8   | C7   | 1.459(3) |
| O3   | C6   | 1.454(3) | C7   | C6   | 1.534(3) |
| O2   | C7   | 1.217(3) | C6   | C5   | 1.521(3) |
| N1   | C2   | 1.449(3) | C13  | C14  | 1.389(4) |
| N1   | C3   | 1.456(4) | C18  | C19  | 1.482(4) |
| N1   | C5   | 1.478(3) | C14  | C15  | 1.367(4) |
| O4   | C18  | 1.196(3) | C17  | C16  | 1.385(4) |
| N3   | C8   | 1.362(3) | C15  | C16  | 1.373(4) |
| N3   | C9   | 1.364(4) | C2   | C1   | 1.500(4) |
| N3   | C11  | 1.465(5) | C19  | C24  | 1.351(6) |
| N2   | C8   | 1.324(4) | C19  | C20  | 1.393(5) |
| N2   | C10  | 1.350(4) | C3   | C4   | 1.495(5) |
| O1   | C4   | 1.403(5) | C9   | C10  | 1.340(5) |
| O1   | C1   | 1.413(5) | C24  | C23  | 1.392(5) |
| C12  | C13  | 1.379(4) | C22  | C21  | 1.310(8) |
| C12  | C17  | 1.382(3) | C22  | C23  | 1.387(8) |
| C12  | C5   | 1.527(3) | C20  | C21  | 1.396(7) |

**Table 5 Bond Angles for rsc-1.**

| Atom | Atom | Atom | Angle/°    | Atom | Atom | Atom | Angle/°  |
|------|------|------|------------|------|------|------|----------|
| C18  | O3   | C6   | 114.29(19) | C6   | C5   | C12  | 114.0(2) |
| C2   | N1   | C3   | 110.1(2)   | C12  | C13  | C14  | 120.7(2) |
| C2   | N1   | C5   | 116.4(2)   | O4   | C18  | O3   | 123.8(2) |
| C3   | N1   | C5   | 114.3(2)   | O4   | C18  | C19  | 124.9(3) |
| C8   | N3   | C9   | 105.0(3)   | O3   | C18  | C19  | 111.3(3) |
| C8   | N3   | C11  | 128.7(3)   | C15  | C14  | C13  | 120.2(3) |
| C9   | N3   | C11  | 126.3(3)   | C12  | C17  | C16  | 120.6(3) |
| C8   | N2   | C10  | 105.6(3)   | C14  | C15  | C16  | 119.6(2) |
| C4   | O1   | C1   | 110.1(3)   | C15  | C16  | C17  | 120.3(3) |
| C13  | C12  | C17  | 118.5(2)   | N1   | C2   | C1   | 109.6(3) |
| C13  | C12  | C5   | 123.0(2)   | C24  | C19  | C20  | 120.1(4) |
| C17  | C12  | C5   | 118.4(2)   | C24  | C19  | C18  | 122.0(3) |
| N2   | C8   | N3   | 111.5(2)   | C20  | C19  | C18  | 117.9(4) |
| N2   | C8   | C7   | 124.3(2)   | N1   | C3   | C4   | 108.7(3) |
| N3   | C8   | C7   | 124.2(3)   | O1   | C1   | C2   | 112.6(3) |
| O2   | C7   | C8   | 123.1(2)   | C10  | C9   | N3   | 108.0(3) |

|    |    |     |            |     |     |     |          |
|----|----|-----|------------|-----|-----|-----|----------|
| O2 | C7 | C6  | 119.7(2)   | C9  | C10 | N2  | 109.9(3) |
| C8 | C7 | C6  | 117.2(2)   | C19 | C24 | C23 | 121.2(5) |
| O3 | C6 | C5  | 104.44(17) | C21 | C22 | C23 | 125.2(5) |
| O3 | C6 | C7  | 110.06(17) | O1  | C4  | C3  | 112.7(3) |
| C5 | C6 | C7  | 107.7(2)   | C19 | C20 | C21 | 119.5(5) |
| N1 | C5 | C6  | 106.19(18) | C22 | C23 | C24 | 115.9(5) |
| N1 | C5 | C12 | 115.64(18) | C22 | C21 | C20 | 118.1(5) |

**Table 6 Hydrogen Atom Coordinates ( $\text{\AA} \times 10^4$ ) and Isotropic Displacement Parameters ( $\text{\AA}^2 \times 10^3$ ) for rsc-1.**

| Atom | <i>x</i> | <i>y</i> | <i>z</i> | U(eq) |
|------|----------|----------|----------|-------|
| H6   | 5174     | 6332     | 5255     | 62    |
| H5   | 5049     | 8892     | 5556     | 63    |
| H13  | 4804     | 5902     | 6163     | 72    |
| H14  | 4416     | 5467     | 7124     | 78    |
| H17  | 4884     | 9503     | 6671     | 79    |
| H15  | 4302     | 7030     | 7883     | 82    |
| H16  | 4533     | 9049     | 7654     | 91    |
| H2A  | 6075     | 6401     | 6249     | 85    |
| H2B  | 6136     | 7304     | 6898     | 85    |
| H3A  | 6046     | 9548     | 6677     | 102   |
| H3B  | 5913     | 10029    | 5889     | 102   |
| H1A  | 7118     | 6710     | 6853     | 113   |
| H1B  | 6982     | 7154     | 6060     | 113   |
| H9   | 6988     | 6274     | 3856     | 115   |
| H10  | 6781     | 4744     | 4674     | 112   |
| H11A | 5838     | 8408     | 3239     | 166   |
| H11B | 6560     | 8395     | 3380     | 166   |
| H11C | 6254     | 9108     | 3900     | 166   |
| H24  | 3353     | 7877     | 4743     | 127   |
| H22  | 1792     | 6997     | 3299     | 163   |
| H4A  | 6874     | 9323     | 5821     | 144   |
| H4B  | 6962     | 10247    | 6462     | 144   |
| H20  | 3369     | 5595     | 3138     | 142   |
| H23  | 2278     | 8102     | 4309     | 157   |
| H21  | 2288     | 5745     | 2733     | 180   |
